# Supplementary material
Source: PubMed Central journal article supplement (PMC8796868)

# STR Nomenclature Meeting

*April 11-12, 2019 London*

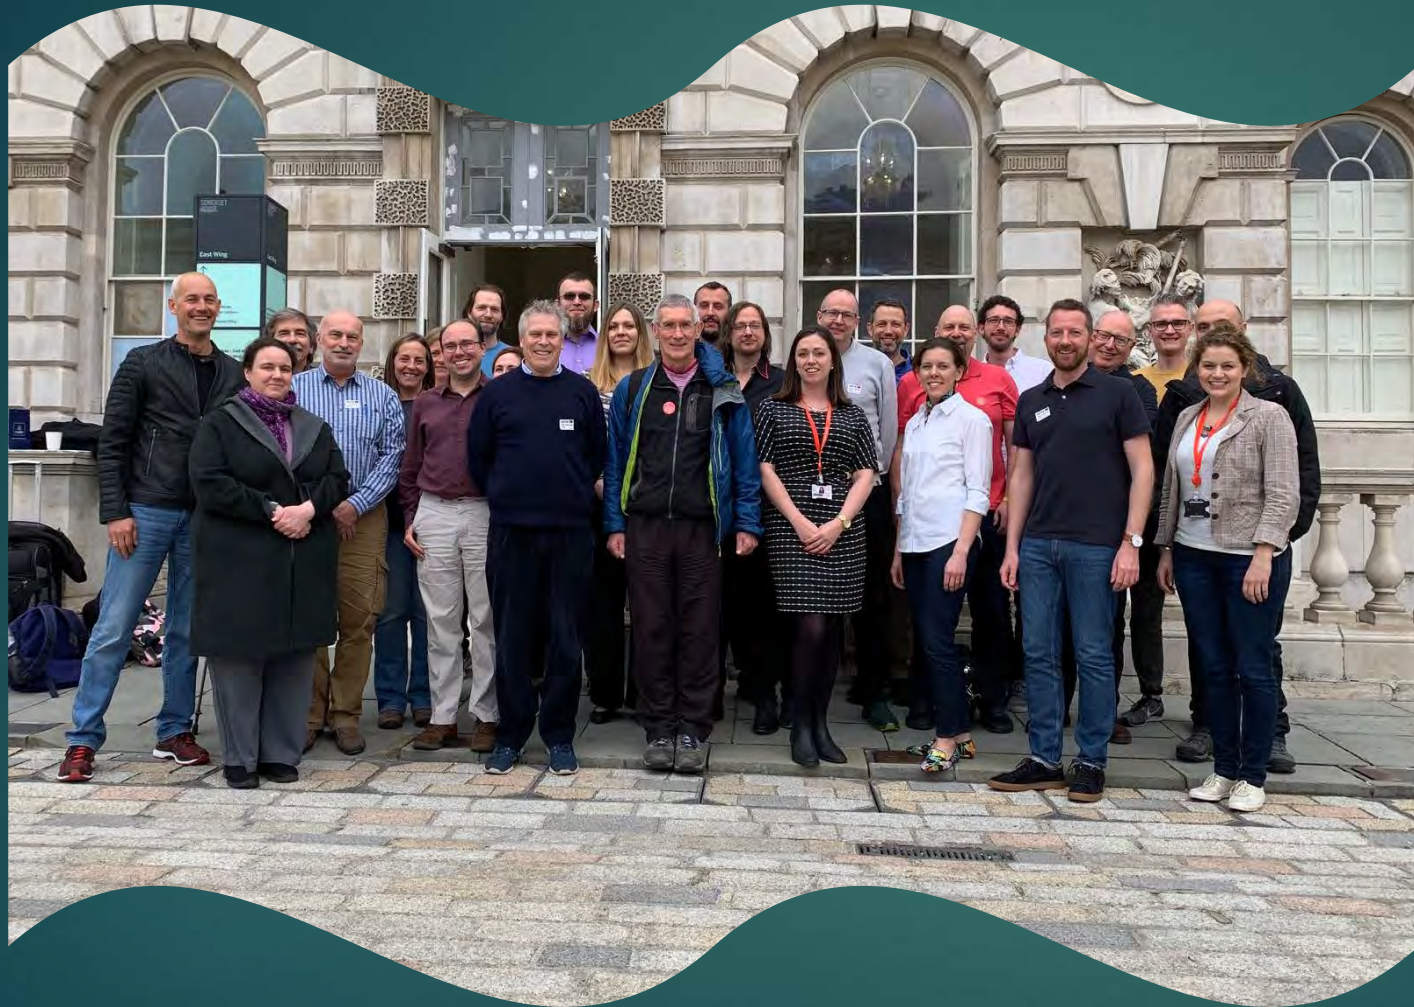

5' to 3':

Walther Parson, Lisa Borsuk, Peter Schneider, Brian Young, Rebecca Just, Jodi Irwin, David Ballard, Sascha Willuweit, Cydne Holt, Chris Phillips, Jonathan King, Tunde Huszar, Peter Gill, Christian Sell, Kris Van der Gaag, Laurence Devesse, Claus Borsting, Doug Hares, Katherine Gettings, Rob Lagace, Jerry Hoogenboom, Martin Bodner, Peter deKnijff, Sebastian Ganschow, Pedro Barrio, Teresa Gross

## Agenda: April 11, 2019

|                   |                                         |
|-------------------|-----------------------------------------|
| 8:30am - 8:45am   | Arrival                                 |
| 8:45am - 9:30am   | Welcome and Opening Remarks - STRAND WG |
| 9:30am - 10:00am  | Tunde Huszar                            |
| 10:00am - 10:15am | Coffee Break                            |
| 10:15am - 10:45am | Pedro Barrio                            |
| 10:45am - 11:15am | Claus Borsting                          |
| 11:15am - 11:45am | Brian Young                             |
| 11:45am - 12:00pm | Discussion                              |
| 12:00pm - 1:30pm  | Lunch on your own                       |
| 1:30pm - 2:00pm   | Peter deKnijff                          |
| 2:00pm - 2:30pm   | Kris Van der Gaag / Jerry Hoogenboom    |
| 2:30pm - 3:00pm   | Sascha Willuweit                        |
| 3:00pm - 3:15pm   | Coffee Break                            |
| 3:15pm - 3:45pm   | Rebecca Just                            |
| 3:45pm - 4:15pm   | Peter Gill                              |
| 4:15pm - 4:45pm   | Sebastian Ganschow                      |
| 4:45pm - 5:00pm   | Discussion and Day 1 Closing Remarks    |

## Agenda: April 12, 2019

|                   |                                                                                                                                                                                                      |
|-------------------|------------------------------------------------------------------------------------------------------------------------------------------------------------------------------------------------------|
| 8:30am - 8:45am   | Arrival                                                                                                                                                                                              |
| 8:45am - 9:00am   | Welcome and Opening Remarks                                                                                                                                                                          |
| 9:00am - 11:00am  | STRAND WG Facilitated Discussion <ul style="list-style-type: none"><li>● Reference genomes, existing databases</li><li>● Quality control</li><li>● Bioinformatics</li><li>● Implementation</li></ul> |
| 11:00am - 11:15am | Coffee Break                                                                                                                                                                                         |
| 11:15am - 12:00pm | Summary, Path Forward, and Closing Remarks                                                                                                                                                           |

**STRAND** *working group*  
align | name | define

STR sequence nomenclature

# NGS of STRs: Nomenclature Panel at ISFG Conference Krakow 2015

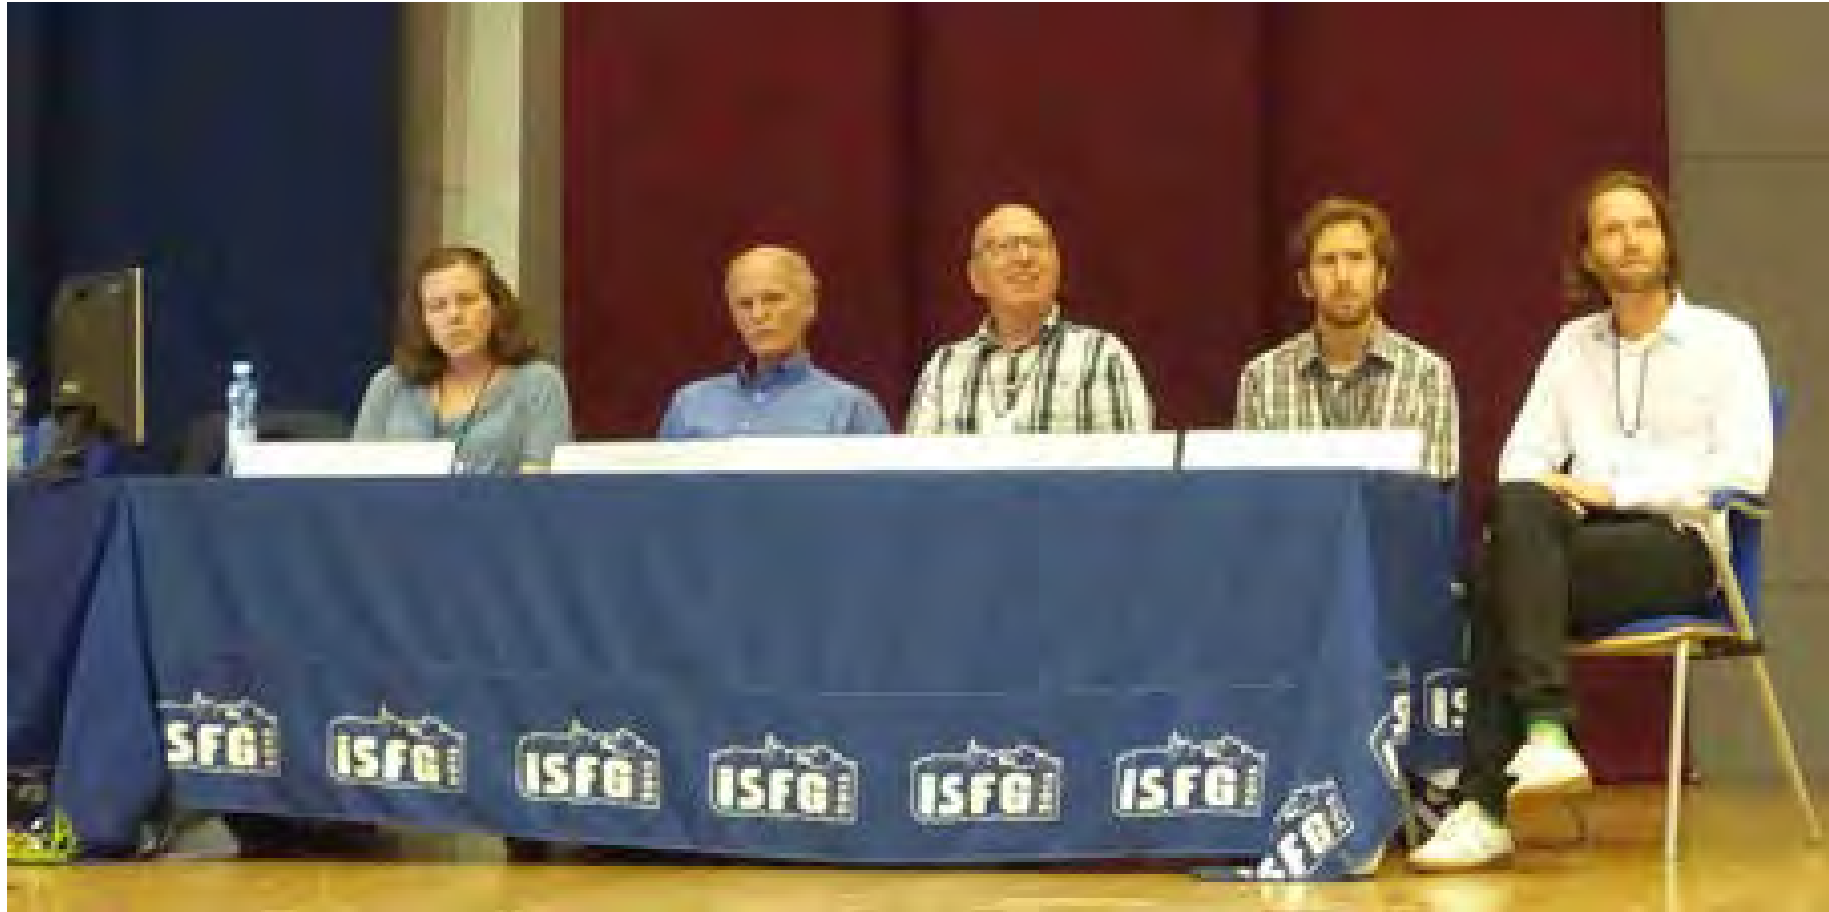



# NGS of STRs: Considerations of the ISFG (2016)

Forensic Science International: Genetics 22 (2016) 54–63

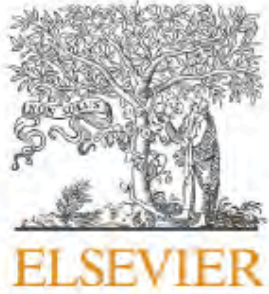

Contents lists available at ScienceDirect

## Forensic Science International: Genetics

journal homepage: [www.elsevier.com/locate/fsig](http://www.elsevier.com/locate/fsig)

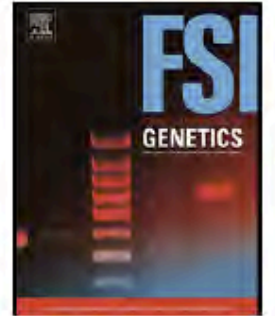

### Massively parallel sequencing of forensic STRs: Considerations of the DNA commission of the International Society for Forensic Genetics (ISFG) on minimal nomenclature requirements

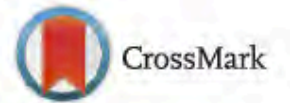

Walther Parson<sup>a,b,\*</sup>, David Ballard<sup>c</sup>, Bruce Budowle<sup>d,e</sup>, John M. Butler<sup>f</sup>, Katherine B. Gettings<sup>f</sup>, Peter Gill<sup>g,h</sup>, Leonor Gusmão<sup>i,j,k</sup>, Douglas R. Hares<sup>l</sup>, Jodi A. Irwin<sup>l</sup>, Jonathan L. King<sup>d</sup>, Peter de Knijff<sup>m</sup>, Niels Morling<sup>n</sup>, Mechthild Prinz<sup>o</sup>, Peter M. Schneider<sup>p</sup>, Christophe Van Neste<sup>q</sup>, Sascha Willuweit<sup>r</sup>, Christopher Phillips<sup>s</sup>

the **full sequence** (sequence string),  
the **alignment of sequences** relative to a reference sequence  
the **annotation** of alleles



### 3.1. Most Cited Articles, 2018 (Published IF Window 2016-2017)

| Citations | Citations (lifetime) | Article Title                                                                                                                                                                       | Authors                                                                                                                                                                                        | Publication Year | Document Type |
|-----------|----------------------|-------------------------------------------------------------------------------------------------------------------------------------------------------------------------------------|------------------------------------------------------------------------------------------------------------------------------------------------------------------------------------------------|------------------|---------------|
| 32        | 66                   | Massively parallel sequencing of forensic STRs: Considerations of the DNA commission of the International Society for Forensic Genetics (ISFG) on minimal nomenclature requirements | Parson W.,Ballard D.,Budowle B.,Butler J.M.,Gettings K.B.,Gill P.,Gusmao L.,Hares D.R.,Irwin J.A.,King J.L.,Knijff P.D.,Morling N.,Prinz M.,Schneider P.M.,Neste C.V.,Willuweit S.,Phillips C. | 2016             | Article       |
| 29        | 81                   | Evaluation of the Illumina® Beta Version ForenSeq™ DNA Signature Prep Kit for use in genetic profiling                                                                              | Churchill J.D.,Schmedes S.E.,King J.L.,Budowle B.                                                                                                                                              | 2016             | Article       |
| 27        | 55                   | Sequence variation of 22 autosomal STR loci detected by next generation sequencing                                                                                                  | Gettings K.B.,Kiesler K.M.,Faith S.A.,Montano E.,Baker C.H.,Young B.A.,Guerrieri R.A.,Vallone P.M.                                                                                             | 2016             | Article       |
| 26        | 39                   | Developmental validation of the MiSeq FGx Forensic Genomics System for Targeted Next Generation Sequencing in Forensic DNA Casework and Database Laboratories                       | Jager A.C.,Alvarez M.L.,Davis C.P.,Guzman E.,Han Y.,Way L.,Walichewicz P.,Silva D.,Pham N.,Caves G.,Bruand J.,Schlesinger F.,Pond S.J.K.,Varlaro J.,Stephens K.M.,Holt C.L.                    | 2017             | Article       |
| 23        | 35                   | Massively parallel sequencing of short tandem repeats - Population data and mixture analysis results for the PowerSeq™ system                                                       | Van Der Gaag K.J.,De Leeuw R.H.,Hoogenboom J.,Patel J.,Storts D.R.,Laros J.F.J.,De Knijff P.                                                                                                   | 2016             | Article       |



Forensic Science International: Genetics 24 (2016) 97–102

Contents lists available at ScienceDirect

## Forensic Science International: Genetics

journal homepage: [www.elsevier.com/locate/fsig](http://www.elsevier.com/locate/fsig)

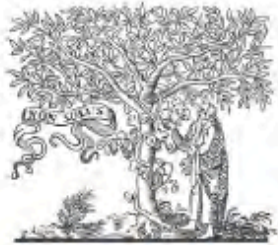

ELSEVIER

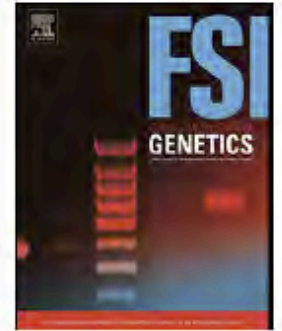

### Recommendations of the DNA Commission of the International Society for Forensic Genetics (ISFG) on quality control of autosomal Short Tandem Repeat allele frequency databasing (STRidER)

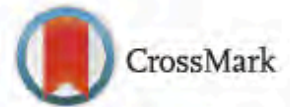

Martin Bodner<sup>a</sup>, Ingo Bastisch<sup>b</sup>, John M. Butler<sup>c</sup>, Rolf Fimmers<sup>d</sup>, Peter Gill<sup>e,f</sup>, Leonor Gusmão<sup>g,h,i</sup>, Niels Morling<sup>j</sup>, Christopher Phillips<sup>k</sup>, Mechthild Prinz<sup>l</sup>, Peter M. Schneider<sup>m</sup>, Walther Parson<sup>a,n,\*</sup>

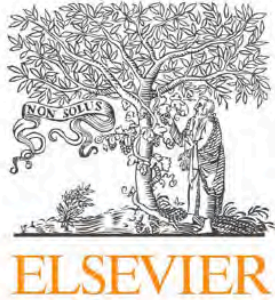

Contents lists available at [ScienceDirect](#)

## Forensic Science International: Genetics

journal homepage: [www.elsevier.com/locate/fsigen](http://www.elsevier.com/locate/fsigen)

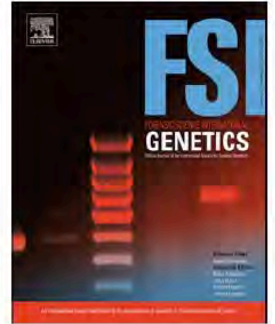

Research paper

### STRSeq: A catalog of sequence diversity at human identification Short Tandem Repeat loci

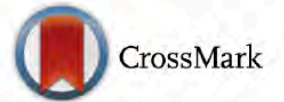

Katherine Butler Gettings<sup>a,\*</sup>, Lisa A. Borsuk<sup>a</sup>, David Ballard<sup>b</sup>, Martin Bodner<sup>c</sup>, Bruce Budowle<sup>d,e</sup>, Laurence Devesse<sup>b</sup>, Jonathan King<sup>d</sup>, Walther Parson<sup>c,f</sup>, Christopher Phillips<sup>g</sup>, Peter M. Vallone<sup>a</sup>

**NCBI BioProject—STRseq and STRidER**  
Collaboration in QC and exchange of data



# “The devil’s in the detail”: Release of an expanded, enhanced and dynamically revised forensic STR Sequence Guide

(2018)

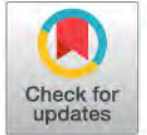

C. Phillips<sup>a,\*</sup>, K. Butler Gettings<sup>b</sup>, J.L. King<sup>c</sup>, D. Ballard<sup>d</sup>, M. Bodner<sup>e</sup>, L. Borsuk<sup>b</sup>, W. Parson<sup>e,f</sup>

<sup>a</sup> Forensic Genetics Unit, Institute of Forensic Sciences, University of Santiago de Compostela, Spain

<sup>b</sup> National Institute of Standards and Technology, Biomolecular Measurement Division, Gaithersburg, MD, USA

<sup>c</sup> Institute of Applied Genetics, Department of Molecular and Medical Genetics, University of North Texas Health Science Center, Fort Worth, TX, USA

<sup>d</sup> King’s Forensics, King’s College London, Franklin-Wilkins Building, London, UK

<sup>e</sup> Institute of Legal Medicine, Medical University of Innsbruck, Innsbruck, Austria

<sup>f</sup> Forensic Science Program, The Pennsylvania State University, University Park, PA, USA, USA

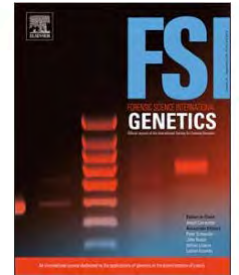

+ **revised** STR Sequence Guide as **dynamic** document at STRidER

HOME QUERY BATCH QUERY ABOUT FREQUENCIES FORMULAE QUALITY CONTROL STR SEQ NOMENCLATURE

## STR Sequence Nomenclature

The ‘Forensic STR Sequence Structure’ file is an updated set of forensic STR sequences that was originally published as *Supplementary File S1* in the article:

**The most recent version of this permanently curated and updated Forensic STR sequence structure file containing updated information is available for download [here](#).** The updates since the last version are reported in a change log contained in the file. To receive information on new releases of the Forensic STR sequence structure file and to stay updated about STRidER, [register here](#) for the STRidER newsletter.

## Goals

Continue collection of STR sequence information to understand variation

Update STRSeq @NCBI and STR sequence guide @STRidER

Harmonize efforts to develop a common STR nomenclature system

Propose a common STR nomenclature system to the community through the ISFG

This is a nomenclature panel

This is **NOT** a panel to focus on technical and analytical problems

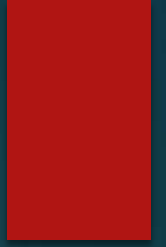

## Katherine Gettings - NIST Applied Genetics Group

- ▶ NIST population sample sequencing
- ▶ Reference materials for STR sequencing



# STRAND *working group*

align | name | define

## NIST population sample sequencing

Forensic Science International: Genetics 37 (2018) 106–114

Contents lists available at ScienceDirect

Forensic Science International: Genetics

journal homepage: www.elsevier.com/locate/FSIG

Research paper

Sequence-based U.S. population data for 27 autosomal STR loci

Katherine Butler Gettings<sup>a</sup>, Lisa A. Borsuk, Carolyn R. Steffen, Kevin M. Kistler<sup>a</sup>

<sup>a</sup> U.S. National Institute of Standards and Technology, Biomolecular Measurement Division, 100 Bureau Drive, Gaithersburg, MD 20899, USA

ARTICLE INFO

ABSTRACT

Keywords: STR, Allele frequency, Sequence

This manuscript reports Short Tandem Repeat (STR) sequence data for 27 autosomal STR loci: D1S1656, TPOX, D2S441, D16S1043, D7S820, D8S1179, D9S1122, D10S1248, D17S1301, D18S51, D19S433, D20S482, D21S11, Penta E, and Penta D. All samples have been evaluated using the same bioinformatic pipelines and all samples have been evaluated at all loci. Each reported sequence includes by the most recent guidance of the International Commission on Forensic Genetics (ICFG) for each population and accession numbers are reported for each sequence, and a link to the STR allele frequency project (STRAF) is provided. The increase in heterozygosity across populations (approximately 10% to 5% per population) and the increase in heterozygosity from 10 to 5 percent per population point increase in average heterozygosity. Direct traditional CE results, such as informing stutter model parameters for population sampling strategies in light of sequence-based STR loci. This NIST 1036 data set is expected to be a valuable resource for forensic casework by providing high-confidence sequence data already the basis for population statistics in many forensic laboratories.

**1. Introduction**

In forensic casework, Short Tandem Repeat (STR) allele frequency data is used to calculate statistical weight when a person of interest cannot be excluded as a possible contributor of genetic material recovered from an item of evidence. This statistical weight should be derived from the same level of information which was used for comparison; therefore, implementation of STR sequencing into forensic casework necessitates the development of appropriate allele frequency data sets.

Several recent publications have reported sequence-based allele frequency data for autosomal STR loci [1–6]. This manuscript reports high-confidence autosomal STR sequence-based allele frequencies for N = 1036 across 27 autosomal STR loci: D1S1656, TPOX, D2S441, D2S1338, D3S1358, D4S2408, FGA, D5S818, CSF1PO, D6S1043, D7S820, D8S1179, D9S1122, D10S1248, TH01, vWA, D12S391, D13S317, Penta E, D16S539, D17S1301, D18S51, D19S433, D20S482, D21S11, Penta E, and Penta D.

The preceding allele frequencies for each locus by population in this dataset; analysis with quality flanking sequence at every loci confirmation of all null same length but different repeat units.

The preceding allele frequencies for each locus by population in this dataset; analysis with quality flanking sequence at every loci confirmation of all null same length but different repeat units.

<sup>\*</sup> Corresponding author at: National Institute of Standards and Technology, Biomolecular Measurement Division, E-mail addresses: katherine.gettings@nist.gov (K.B. Gettings), lisa.borsuk@nist.gov (L.A. Borsuk), becky.kevin.kistler@nist.gov (K.M. Kistler), ceter.vallone@nist.gov (P.M. Vallone).

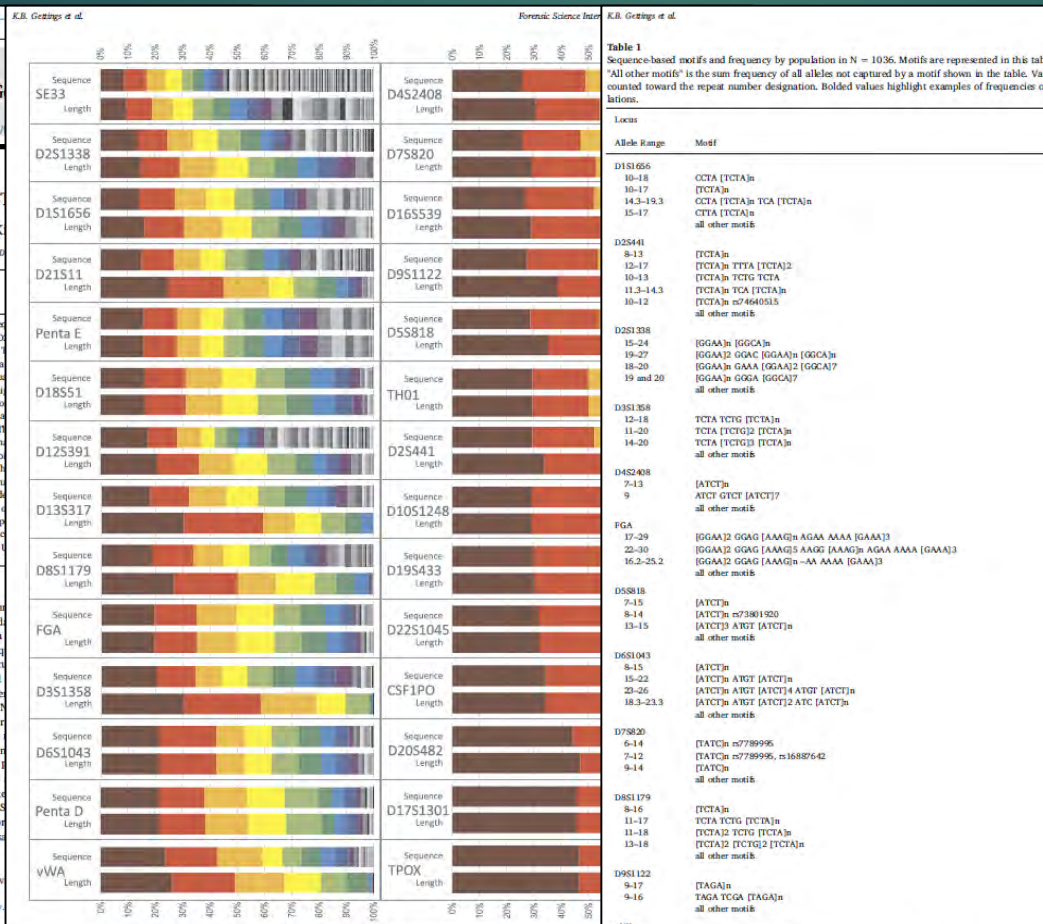

**Fig. 2.** Across-population allele frequency distribution per locus, by sequence and by length in N = 1036. Loci are sorted in descending order of the most common allele at each locus (first column top to bottom followed by second column top to bottom). The color coding facilitates comparisons within and across loci, with any remaining alleles shown in grayscale. Sequence data for this reported in [9].

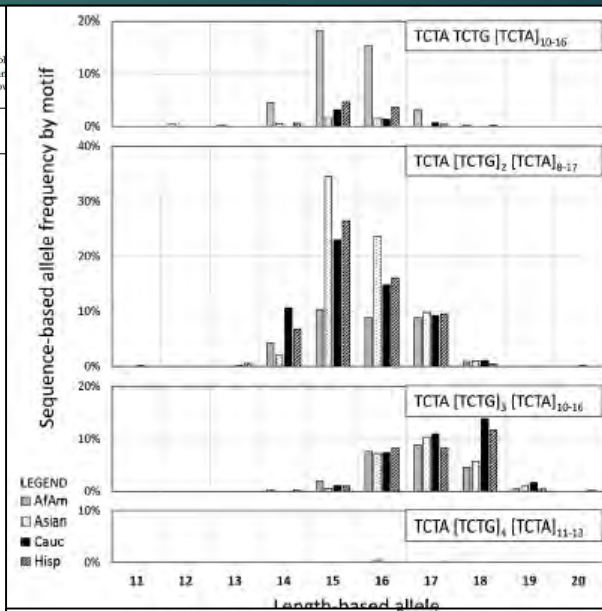

**Fig. 3.** D3S1358 frequency distribution among the primary motifs by length-based allele and population in N = 1036. The motif is defined as: the first subunit is fixed TCTA, the second subunit is definitive of the motif with TCTG varying from one to four, and the third subunit contains a widely varying number of TCTA repeats. For simplicity, seven additional rare motif alleles present in the data set have been excluded from this figure.

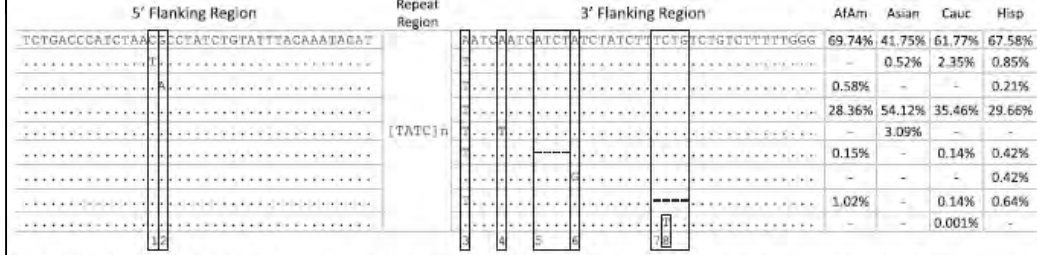

**Fig. 4.** D13S317 frequency distribution by population of the nine flanking region motifs identified in N = 1036. The first row of 5' and 3' flanking sequence is consistent with GRCh38, and is the most common sequence found in this data set. Dots in subsequent rows represent bases matching the first row. Flanking polymorphisms are identified by numbers one through eight in the bottom row: 1) rs73250432 C > T, 2) rs146621667 G > A, 3) rs9546005 A > T, 4) rs202043589 A > T, 5) rs1442523705 delATCT, 6) rs2137543825 A > G, 7) rs561167308 delTCTG, and 8) rs768323113 C > T. Variation in repeat region length, combined with these flanking region polymorphisms, results in 32 sequence-based alleles at this locus. Three additional D13S317 alleles in this data set result from repeat region sequence variants, not observed once, and have been excluded from this figure.



# STRAND *working group*

align | name | define

NIST Public Data Repository

1.1.0-beta

<https://doi.org/10.18434/T4/1500024>

Public Data Resource

## Sequence-based U.S. population data for 27 autosomal STR loci

Contact: [Katherine Gettings](#)

Identifier: [doi:10.18434/T4/1500024](https://doi.org/10.18434/T4/1500024)

Version: 1.0.1 Last modified: 2018-06-14

### Description

This information and data are supplemental files associated with: K.B. Gettings, L.A. Borsuk, C.R. Steffen, K.M. Genetics 37 (2018) 106-115. The primary data consists of sequence-based allele frequencies for N=1036 and D2S1338, D3S1358, D4S2408, FGA, D5S818, CSF1PO, D6S1043, D7S820, D8S1179, D9S1122, D10S1248, TH01. This information is expected to support the implementation of sequence-based STR analysis in forensic applications. The 42 sequencing runs performed to generate the allele frequency data (S1 - Run Metrics); coverage per locus (S2 - Coverage); allele frequency data (S3 - Frequencies); GRCh38 reference coordinates for genomic regions reported (S5 - Flank Polymorph); number of alleles, expected and observed heterozygosity, and p-values associated with disequilibrium (S7 - LD p-values); and pairwise Fst values by population for the 27 auSTR loci (Supp Table 8 - P quality control of the data.

Subject Keywords: STR, forensic, sequence, population, allele frequency

### Data Access

These data are public.

Files Click on the file/row in the table below to view more details.

#### Name

[NIST1036\\_auSTR\\_Seq\\_SuppFile1.pdf](#)

[NIST1036\\_auSTR\\_Seq\\_SuppFile1.pdf.sha256](#)

[NIST1036\\_auSTR\\_Seq\\_SuppTables.xlsx](#)

[NIST1036\\_auSTR\\_Seq\\_SuppTables.xlsx.sha256](#)

### References

This data is referenced in:

<https://doi.org/10.1016/j.fsigen.2018.07.013>

## 11 pages of methods, including:

| Population, Sample Type  | Locus   | CE           | UAS    | SR              | Source                                                                   |
|--------------------------|---------|--------------|--------|-----------------|--------------------------------------------------------------------------|
| African American, Blood  | Penta D | 2.2,13.4     | 2.2,14 | <b>2.2,13.4</b> | 1 bp deletion<br>rs536566765                                             |
| African American, Buccal | D5S818  | <b>7,12*</b> | 8,12   | <b>8,12*</b>    | Assumed 4 bp<br>deletion outside<br>ForenSeq amplicon                    |
| Hispanic, Blood          | D7S820  | 10.3,11      | 11,11  | <b>10.3,11</b>  | 1 bp deletion,<br>rs897512434                                            |
| Caucasian, Blood         | D9S1122 | (12),14      | 12,14  | <b>11.2,14</b>  | 2 bp deletion<br>rs754976988,<br>overlaps with CE<br>primer binding site |

Table D. Discordance between CE and sequence data observed in N=1036. Bolded genotypes used in allele frequency calculations. \*8,12 used in 1036 sequence-based frequencies, 7,12 used in 1036 CE-based frequencies [2].

# STRAND *working group*

align | name | define

NIST Public Data Repository

1.1.0-beta

<https://doi.org/10.18434/T4/1500024>

Public Data Resource  
Sequence-based U.S. population data for 27 autosomal STR loci

Contact: [Katherine Gettings](#)

Identifier: [doi:10.18434/T4/1500024](https://doi.org/10.18434/T4/1500024)

[Visit Home Page](#)

Table with columns: Locus, Allele, Frequency, Count, and Sequence. The table lists 27 autosomal STR loci and their corresponding alleles and frequencies. A large watermark text '~800 unique sequences' is overlaid on the table.

NIST1036\_auSTR\_Seq\_SuppTables.xlsx

application/vnd.openxmlformats-officedocument.spreadsheetml.sheet

NIST1036\_auSTR\_Seq\_SuppTables.xlsx sha256

text/plain

## References

This data is referenced in:

<https://doi.org/10.1016/j.fsigen.2018.07.013>



# STRAND *working group*

align | name | define

## Controls for STR Sequencing

- ▶ NIST SRM 2391d
- ▶ Expected release Summer 2019
- ▶ STR sequence data:
  - ▶ ForenSeq
  - ▶ Precision ID GlobalFiler NGS STR Panel v2
  - ▶ PowerSeq 46GY (prototype)

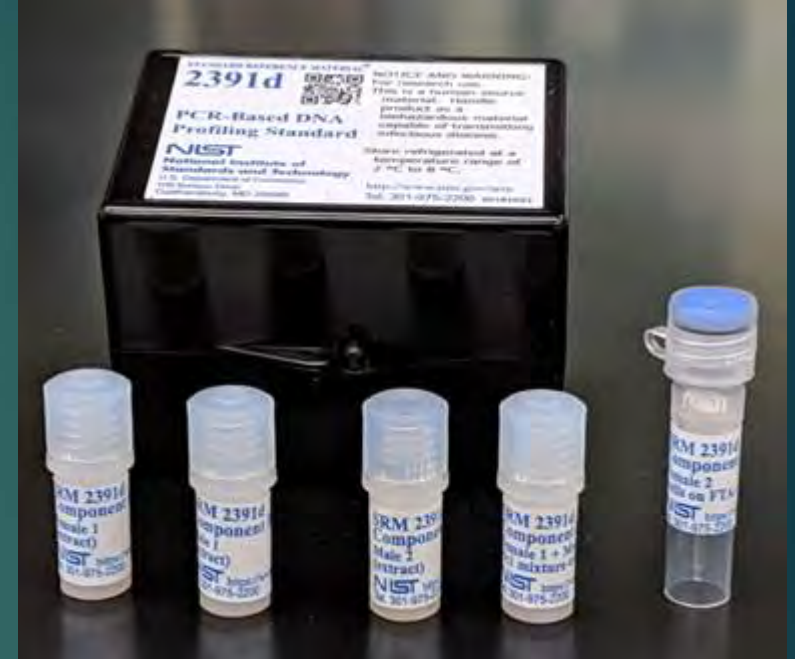



# STRAND *working group*

align | name | define

## Controls for STR Sequencing

- ▶ NIST GiaB
  - ▶ 7 Coriell cell lines
  - ▶ One individual and two trios
  - ▶ PCR-free prep, HiSeq 150 and 250, PacBio
- ▶ STR project
  - ▶ Any “novel” marker can be characterized
  - ▶ ISFG Poster targeting ~500 “novel” STRs

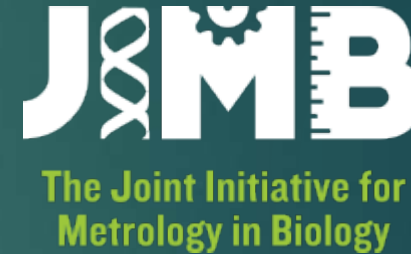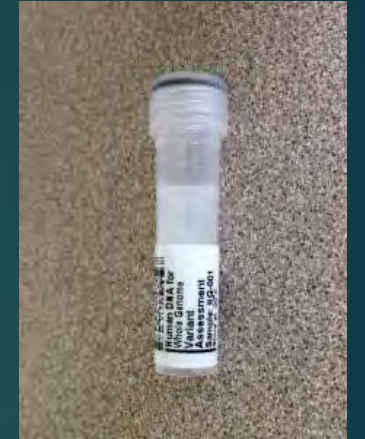

# STRAND *working group*

align | name | define

Lisa Borsuk - NIST Applied Genetics Group

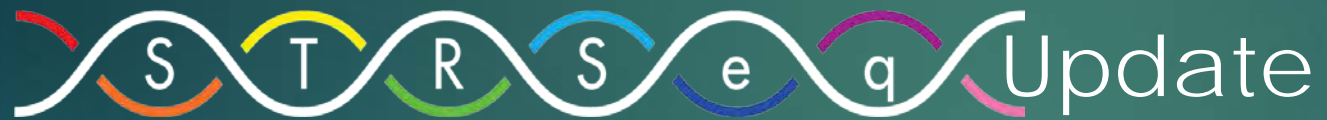

- ▶ BioProject Structure
- ▶ Record Structure
- ▶ Current Sample Sets
- ▶ BioProject Status

# STRAND *working group*

align | name | define

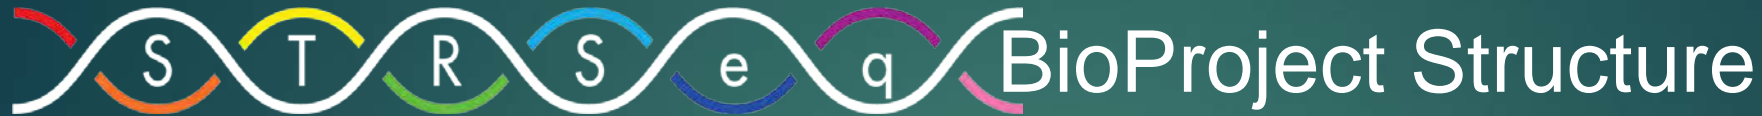

## The STR Sequencing Project (human)

Umbrella project

National Institute of Standards and Technology

Accession: PRJNA380127

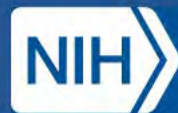

U.S. National Library of Medicine  
National Center for Biotechnology Information

<https://www.ncbi.nlm.nih.gov/bioproject/380127>

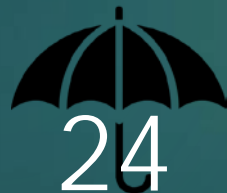

### Homo sapiens

**STRSeq** Commonly Used Autosomal STR Loci

Umbrella project

National Institute of Standards and Technology

Accession: PRJNA380345 ID: 380345

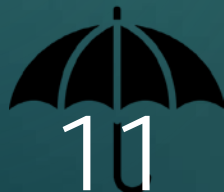

### Homo sapiens

**STRSeq** Alternate Autosomal STR Loci

Umbrella project

National Institute of Standards and Technology

Accession: PRJNA380346 ID: 380346

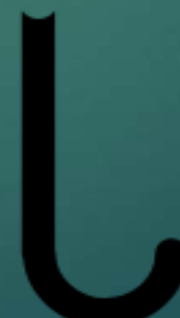

### Homo sapiens

**STRSeq** X-Chromosomal STR Loci

Umbrella project

National Institute of Standards and Technology

Accession: PRJNA380348 ID: 380348

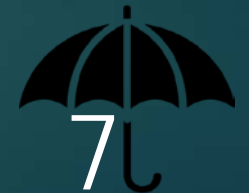

### Homo sapiens

**STRSeq** Y-Chromosomal STR Loci

Umbrella project

National Institute of Standards and Technology

Accession: PRJNA380347 ID: 380347

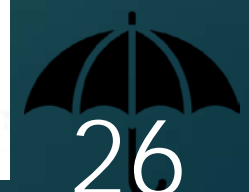



# STRAND *working group*

align | name | define

**Homo sapiens** Accession: PRJNA380345 ID: 380345

## STRSeq Commonly Used Autosomal STR Loci

This sub-project of the STR Sequencing Project encompasses the data pertaining to 24 autosomal STR loci which are commonly targeted in human identification assays.

|                        |                                                                                                                                                                    |
|------------------------|--------------------------------------------------------------------------------------------------------------------------------------------------------------------|
| Accession              | PRJNA380345                                                                                                                                                        |
| Type                   | Umbrella project                                                                                                                                                   |
| Publications (total 5) | 1. Borsuk LA <i>et al.</i> , "Sequence-based US population data for the SE33 locus.", <i>Electrophoresis</i> , 2018 Jun 1;39(21):2694-2701 <a href="#">More...</a> |
| Submission             | Registration date: 24-Mar-2017<br><b>National Institute of Standards and Technology</b>                                                                            |
| Related Resources      | <ul style="list-style-type: none"> <li>• <a href="#">STRSeq</a></li> <li>• <a href="#">STRidER</a></li> </ul>                                                      |
| Relevance              | Human Identification                                                                                                                                               |

**NAVIGATE UP**

This project is a component of the The STR Sequencing Project (human)

**NAVIGATE ACROSS**

3 additional projects are components of the The STR Sequencing Project (human).

### Project Data:

| Resource Name            | Number of Links |
|--------------------------|-----------------|
| SEQUENCE DATA            |                 |
| Nucleotide (Genomic DNA) | 1251            |
| PUBLICATIONS             |                 |
| PubMed                   | 5               |

### Homo sapiens encompasses the following 24 sub-projects:

| Project Type                                            | Number of Projects |                                                                            |
|---------------------------------------------------------|--------------------|----------------------------------------------------------------------------|
| <b>targeted loci</b>                                    | 24                 |                                                                            |
| BioProject accession                                    | Organism           | Title                                                                      |
| PRJNA380553                                             | Homo sapiens       | STRSeq D1S1656 Sequence-Based Alleles (National Institute of Standards...) |
| PRJNA380554                                             | Homo sapiens       | STRSeq TPOX Sequence-Based Alleles (National Institute of Standards...)    |
| PRJNA380555                                             | Homo sapiens       | STRSeq D2S441 Sequence-Based Alleles (National Institute of Standards...)  |
| PRJNA380556                                             | Homo sapiens       | STRSeq D2S1338 Sequence-Based Alleles (National Institute of Standards...) |
| PRJNA380558                                             | Homo sapiens       | STRSeq D3S1358 Sequence-Based Alleles (National Institute of Standards...) |
| <a href="#">List all 24 'targeted loci' projects...</a> |                    |                                                                            |

Links to BioProjects

## The STR Sequencing Project (human)

Accession: PRJNA380127 ID: 380127

The purpose of STRSeq is to facilitate the description of sequence-based alleles at the Short Tandem Repeat (STR) loci targeted in human identification assays. This collaborative effort of the international forensic DNA community, which has been endorsed by the executive board of the ISFG (International Society of Forensic Genetics), provides a framework for communication among laboratories. Each record contains: (a) observed sequence of an STR region, (b) annotation of the repeat region ("bracketing") and flanking region polymorphisms, (c) information regarding the sequencing assay and data quality, and (d) backward compatible length-based allelic designation. Data within the umbrella project is organized into locus sub-projects, and can be accessed by browsing, BLAST searching, or ftp download at NCBI. For comments or questions, please contact [strseq@nist.gov](mailto:strseq@nist.gov).

|                        |                                                                                                                                                                    |
|------------------------|--------------------------------------------------------------------------------------------------------------------------------------------------------------------|
| Accession              | PRJNA380127                                                                                                                                                        |
| Type                   | Umbrella project                                                                                                                                                   |
| Publications (total 5) | 1. Borsuk LA <i>et al.</i> , "Sequence-based US population data for the SE33 locus.", <i>Electrophoresis</i> , 2018 Jun 1;39(21):2694-2701 <a href="#">More...</a> |
| Submission             | Registration date: 22-Mar-2017<br><b>National Institute of Standards and Technology</b>                                                                            |
| Related Resources      | <ul style="list-style-type: none"> <li>• <a href="#">STRSeq</a></li> <li>• <a href="#">STRidER</a></li> </ul>                                                      |
| Relevance              | Human Identification                                                                                                                                               |

### Project Data:

| Resource Name            | Number of Links |
|--------------------------|-----------------|
| SEQUENCE DATA            |                 |
| Nucleotide (Genomic DNA) | 1320            |
| PUBLICATIONS             |                 |
| PubMed                   | 5               |

### The STR Sequencing Project (human) encompasses the following 4 sub-projects:

| Project Type            | Number of Projects |                                                                              |
|-------------------------|--------------------|------------------------------------------------------------------------------|
| <b>Umbrella project</b> | 4                  |                                                                              |
| BioProject accession    | Name               | Title                                                                        |
| PRJNA380345             | Homo sapiens       | STRSeq Commonly Used Autosomal STR Loci (National Institute of Standards...) |
| PRJNA380346             | Homo sapiens       | STRSeq Alternate Autosomal STR Loci (National Institute of Standards...)     |
| PRJNA380347             | Homo sapiens       | STRSeq Y-Chromosomal STR Loci (National Institute of Standards...)           |
| PRJNA380348             | Homo sapiens       | STRSeq X-Chromosomal STR Loci (National Institute of Standards...)           |



# STRAND *working group*

align | name | define

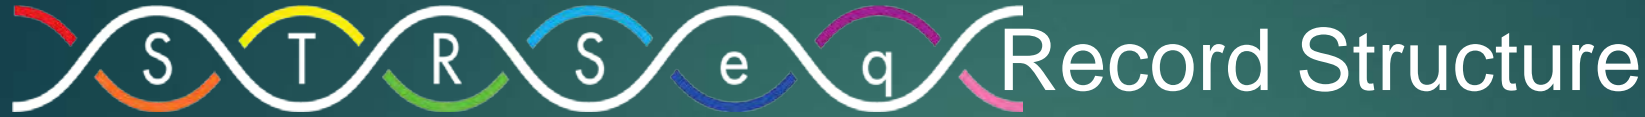

GenBank → Send to: -

## Homo sapiens microsatellite rs1019813099 sequence

GenBank: MH174843.1 Graphics →

**FEATURES**

|                               |                                                  |
|-------------------------------|--------------------------------------------------|
| source                        | Location/Qualifiers                              |
|                               | 1..138                                           |
|                               | /organism="Homo sapiens"                         |
|                               | /mol_type="genomic DNA"                          |
|                               | /db_xref="taxon:9606"                            |
| <a href="#">misc feature</a>  | 1..117                                           |
|                               | /note="Illumina ForenSeq DNA Signature Prep Kit" |
| <a href="#">misc feature</a>  | 6..138                                           |
|                               | /note="Promega PowerSeq 46GY System"             |
| <a href="#">variation</a>     | 38                                               |
|                               | /note="C/T SNP"                                  |
|                               | /db_xref="dbSNP:rs1019813099"                    |
| <a href="#">repeat region</a> | 62..117                                          |
|                               | /rpt_type=tandem                                 |
|                               | /satellite="microsatellite:D1S1656"              |

**ORIGIN**

```

1 ttcagagaaa tagaatcact agggaaccaa atatatacac atacaattaa acacacacac
61 acctatctat ctatctatct atctatctat ctatctatct atctatctat ctatctacat
121 cacacagttg acccttga
//
    
```

62..117  
/rpt\_type=tandem  
/satellite="microsatellite:D1S1656"

repeat\_region ▾ [Feature](#) 1 of 1 MH174843: 1 segment [Details](#) [Display: FASTA](#) [GenBank](#) [Help](#) ✕

of Standards and Technolo  
Gaithersburg, Maryland 20

collaborative effort of the international forensic DNA community. The purpose of this project is to facilitate the description of sequence-based STR alleles. Additional resources can be found at [strseq.nist.gov](http://strseq.nist.gov). For questions or feedback, please contact [strseq@nist.gov](mailto:strseq@nist.gov). Allele frequency data can be accessed in the [strider.online](http://strider.online) database.

GenBank → Send to: -

## Homo sapiens microsatellite D1S1656 14 CCTA [TCTA]13 rs1019813099 sequence

GenBank: MH174843.1 [FASTA](#) [Graphics](#)

**Go to:**

**LOCUS** MH174843 138 bp DNA linear PRI 04-SEP-2018

**DEFINITION** Homo sapiens microsatellite D1S1656 14 CCTA [TCTA]13 rs1019813099 sequence.

**ACCESSION** MH174843

**VERSION** MH174843.1

**DBLINK** BioProject: [PRJNA380553](#)

**KEYWORDS** STRseq; STR; D1S1656.

**SOURCE** Homo sapiens (human)

**ORGANISM** [Homo sapiens](#)  
Eukaryota; Metazoa; Chordata; Craniata; Vertebrata; Euteleostomi; Mammalia; Eutheria; Euarchontoglires; Primates; Haplorrhini; Catarrhini; Hominidae; Homo.

**REFERENCE** 1 (bases 1 to 138)

**AUTHORS** Gettings,K.B., Borsuk,L.A., Ballard,D., Bodner,M., Budowle,B., Devesse,L., King,J., Parson,W., Phillips,C. and Vallone,P.M.

**TITLE** STRseq: A catalog of sequence diversity at human identification Short Tandem Repeat loci

**JOURNAL** Forensic Sci Int Genet 31, 111-117 (2017)

**PUBMED** [2888135](#)

**REFERENCE** 2 (bases 1 to 138)

**AUTHORS** NIST,A.G.G.

**TITLE** Direct Submission

**JOURNAL** Submitted (06-APR-2018) Applied Genetics Group, National Institute of Standards and Technology, 100 Bureau Drive, MS-8314, Gaithersburg, Maryland 20899, United States of America

**COMMENT** Annotation ('bracketing') of the repeat region is consistent with the guidance of the ISFG (International Society of Forensic Genetics), PMID: 26844919. Lower case letters in the 'Bracketed repeat' region below denote uncounted bases. The given length-based allele value was determined using the designated length-based technology. Variation in the length-based allele between individuals or assays can result from indels in flanking regions. The length of reported sequence is dependent on the assay and the quality of the flanking sequence. This information is provided as part of the STR Sequencing Project (STRseq), a collaborative effort of the international forensic DNA community. The purpose of this project is to facilitate the description of sequence-based STR alleles. Additional resources can be found at [strseq.nist.gov](http://strseq.nist.gov). For questions or feedback, please contact [strseq@nist.gov](mailto:strseq@nist.gov). Allele frequency data can be accessed in the [strider.online](http://strider.online) database.

```

##HumanSTR-START##
STR locus name      :: D1S1656
Length-based allele :: 14
Bracketed repeat   :: CCTA [TCTA]13
Sequencing technology :: MiSeq FGx; MiSeq
Coverage           :: >30X
Length-based tech.  :: PowerPlex Fusion, 3130xl
Assembly           :: GRCh38 (GCF_000001405)
Chromosome         :: 1
RefSeq Accession   :: NC_000001.11
Chrom. Location    :: 230769555..230769704
Repeat Location    :: 230769616..230769683
Cytogenetic Location :: 1q42.2
##HumanSTR-END##
    
```

**FEATURES**

|                               |                                                  |
|-------------------------------|--------------------------------------------------|
| source                        | Location/Qualifiers                              |
|                               | 1..138                                           |
|                               | /organism="Homo sapiens"                         |
|                               | /mol_type="genomic DNA"                          |
|                               | /db_xref="taxon:9606"                            |
| <a href="#">misc feature</a>  | 1..117                                           |
|                               | /note="Illumina ForenSeq DNA Signature Prep Kit" |
| <a href="#">misc feature</a>  | 6..138                                           |
|                               | /note="Promega PowerSeq 46GY System"             |
| <a href="#">variation</a>     | 38                                               |
|                               | /note="C/T SNP"                                  |
|                               | /db_xref="dbSNP:rs1019813099"                    |
| <a href="#">repeat region</a> | 62..117                                          |
|                               | /rpt_type=tandem                                 |
|                               | /satellite="microsatellite:D1S1656"              |

**ORIGIN**

```

1 ttcagagaaa tagaatcact agggaaccaa atatatacac atacaattaa acacacacac
61 acctatctat ctatctatct atctatctat ctatctatct atctatctat ctatctacat
121 cacacagttg acccttga
//
    
```

# STRAND *working group*

align | name | define

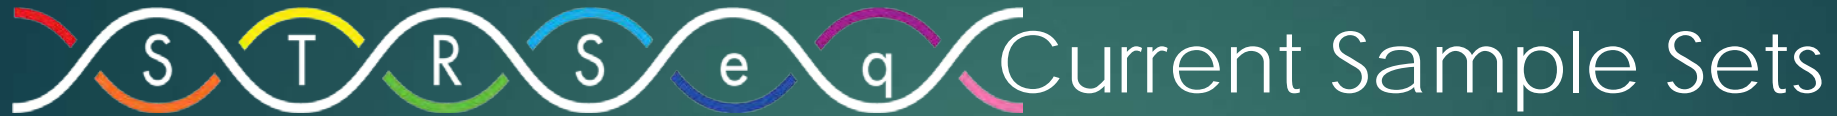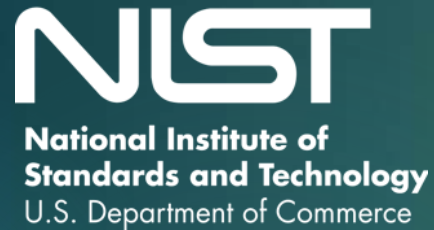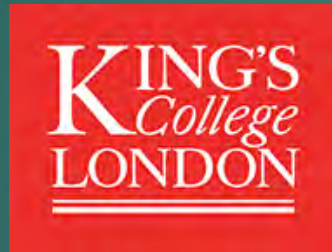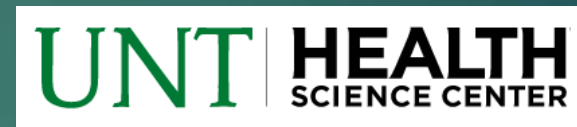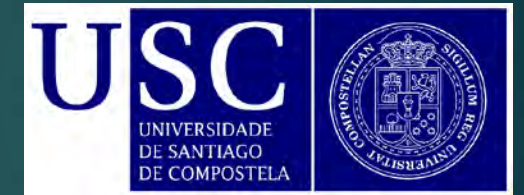

**1786 Samples**

**1043 Samples**

**839 Samples**

**944 Samples**

ForenSeq Verogen,  
PowerSeq 46GY (prototype)  
Promega, and GlobalFiler  
NGS Thermo Fisher (and Sanger  
()  
CE Information

ForenSeq Verogen,  
CE Information

ForenSeq Verogen,  
CE Information

ForenSeq Verogen,  
CE Information

Working towards including more sets of data  
Collaborating with STRidER

# STRAND *working group*

align | name | define



## BioProject Status

**Project Data:**

| Resource Name            | Number of Links |
|--------------------------|-----------------|
| SEQUENCE DATA            |                 |
| Nucleotide (Genomic DNA) | 1320            |
| PUBLICATIONS             |                 |
| PubMed                   | 5               |

- ▶ Currently sequences for autosomal loci have been submitted
  - ▶ Additional autosomal sequences continue to be loaded
- ▶ Y and X data is going to be submitted in the next few months
  - ▶ 2019 Summer - Fall

# STRAND *working group*

align | name | define

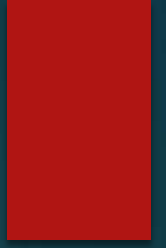

Jonathan King



# STRAND *working group*

align | name | define

## ▶ Current stable release

### ▶ v3

▶ fastq processing (C++ script)

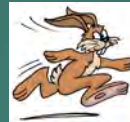

▶ Data visualization and processing (Microsoft Excel)

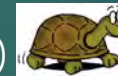

## ▶ Development version

### ▶ R package

▶ Combination of C++ script and functions

▶ Full UI

▶ Data visualization

▶ Allele-calling

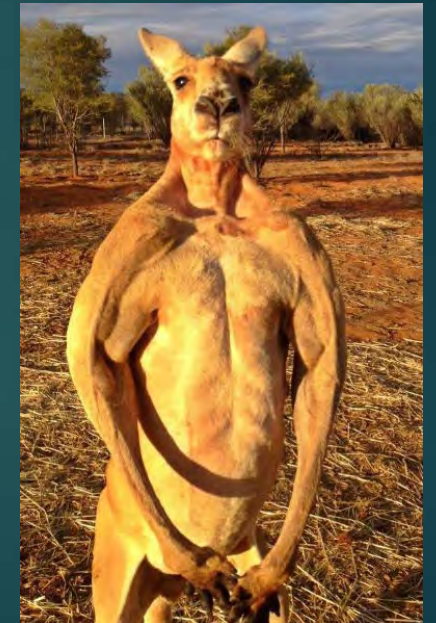

thekangaroosanctuary

# STRAND *working group*

align | name | define

- ▶ **Default settings** (ForenSeq-STRs only)
  - ▶ ~2s per sample
    - ▶ (~15s from fastq)
  - ▶ ~97.9% of alleles called automatically
    - ▶ (>99% excluding D22S1045...)
  - ▶ Stutter Assessment
    - ▶ ~6s per sample
- ▶ **Population-level processing**

# STRAND *working group*

align | name | define

## ► In Development UI

### Edit and save Locus Table

Shiny app for analysis of STRait Razor data.

|    | Status                              | LocusRank | Locus  | Allele | RAP  | AR   | SB   | HaplotypeSur |
|----|-------------------------------------|-----------|--------|--------|------|------|------|--------------|
| 1  | <input checked="" type="checkbox"/> | 1.00      | D7S820 | 8.00   | 0.51 | 0.64 | 0.00 | 588.01       |
| 2  | <input checked="" type="checkbox"/> | 2.00      | D7S820 | 12.00  | 0.33 | 0.64 | 0.00 | 378.01       |
| 3  | <input type="checkbox"/>            | 3.00      | D7S820 | 7.00   | 0.03 |      | 0.00 | 32.01        |
| 4  | <input type="checkbox"/>            | 4.00      | D7S820 | 11.00  | 0.02 |      | 0.00 | 22.01        |
| 5  | <input type="checkbox"/>            | 5.00      | D7S820 | 8.10   | 0.01 |      | 0.00 | 13.01        |
| 6  | <input type="checkbox"/>            | 6.00      | D7S820 | 7.30   | 0.01 |      | 0.00 | 10.01        |
| 7  | <input type="checkbox"/>            | 7.00      | D7S820 | 12.10  | 0.01 |      | 0.00 | 10.01        |
| 8  | <input type="checkbox"/>            | 8.00      | D7S820 | 11.30  | 0.01 |      | 0.00 | 7.01         |
| 9  | <input type="checkbox"/>            | 9.00      | D7S820 | 13.00  | 0.00 |      | 0.00 | 5.01         |
| 10 | <input type="checkbox"/>            | 10.00     | D7S820 | 12.00  | 0.00 |      | 0.00 | 5.01         |
| 11 | <input type="checkbox"/>            | 11.00     | D7S820 | 12.00  | 0.00 |      | 0.00 | 4.01         |
| 12 | <input type="checkbox"/>            | 12.00     | D7S820 | 12.10  | 0.00 |      | 0.00 | 3.01         |
| 13 | <input type="checkbox"/>            | 13.00     | D7S820 | 8.00   | 0.00 |      | 0.00 | 2.01         |
| 14 | <input type="checkbox"/>            | 14.00     | D7S820 | 8.00   | 0.00 |      | 0.00 | 2.01         |
| 15 | <input type="checkbox"/>            | 15.00     | D7S820 | 8.00   | 0.00 |      | 0.00 | 2.01         |
| 16 | <input type="checkbox"/>            | 16.00     | D7S820 | 10.00  | 0.00 |      | 0.00 | 2.01         |
| 17 | <input type="checkbox"/>            | 17.00     | D7S820 | 8.00   | 0.00 |      | 0.00 | 2.01         |

Save table

Save Output Table

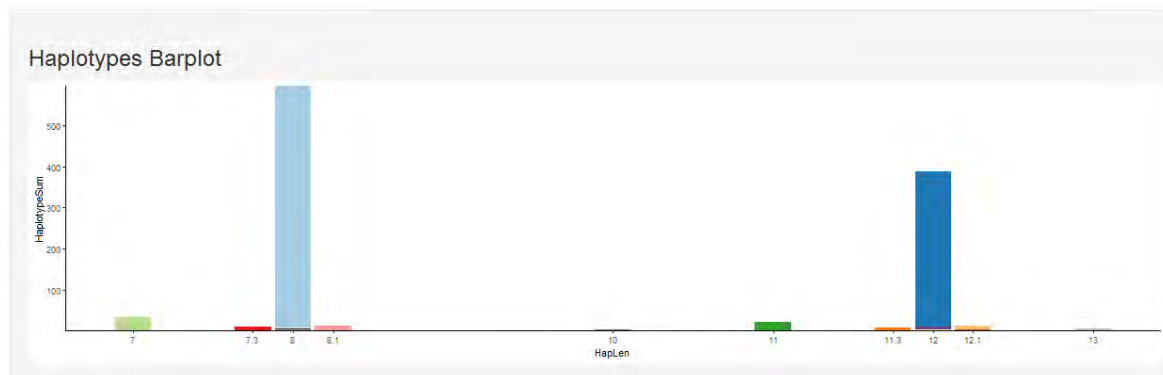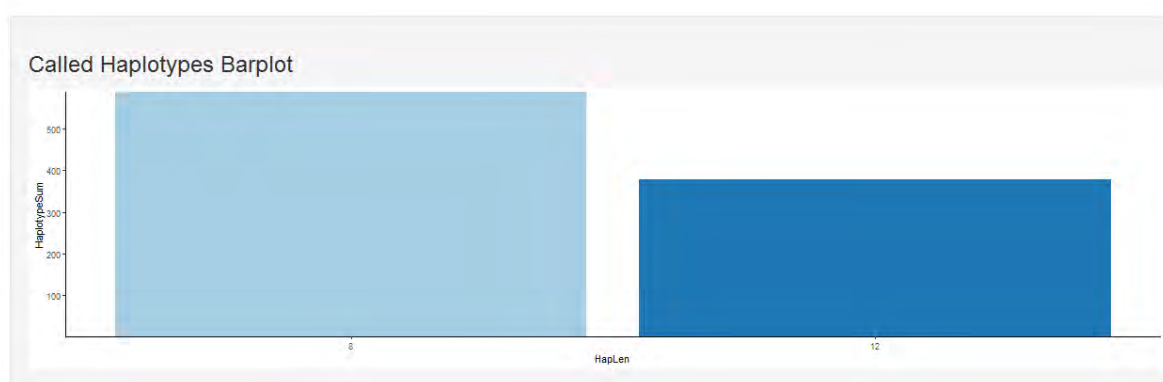

# STRAND *working group*

align | name | define

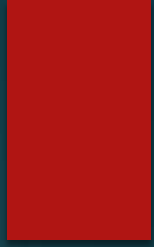

## STRait Razor Analysis

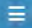

Relative Allele Percentage Threshold

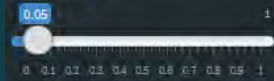

Strand Balance Threshold

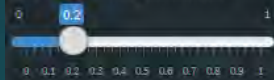

Haplotype Depth Threshold

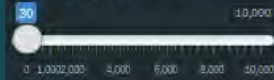

Save Output Table

| Status | LocusRank | Locus |
|--------|-----------|-------|
|        |           |       |

D2S441

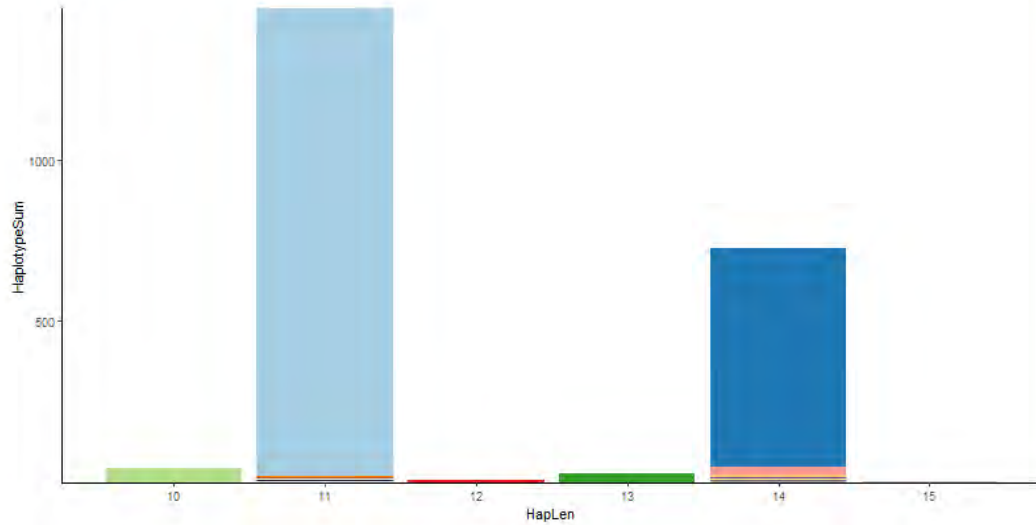

D2S441

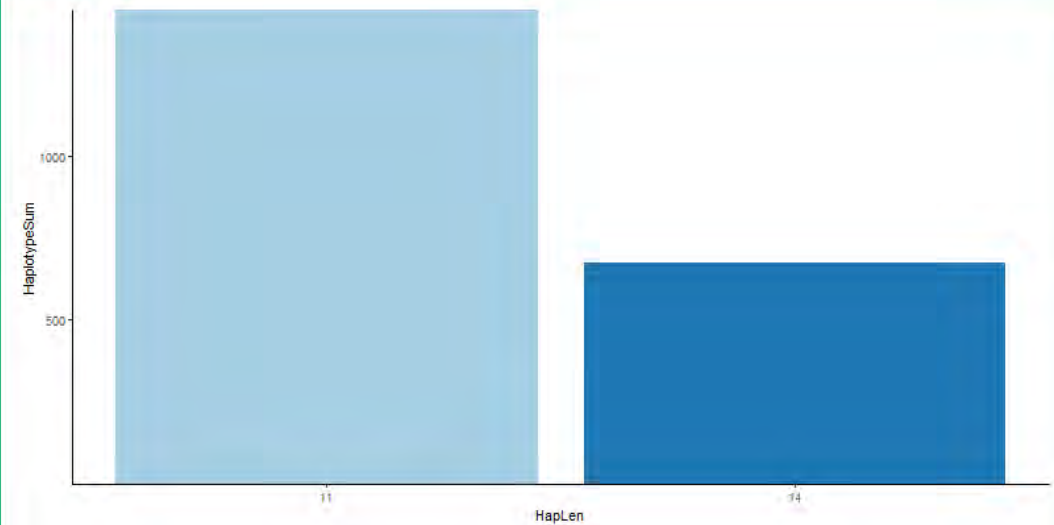



# STRAND *working group*

align | name | define

Caution

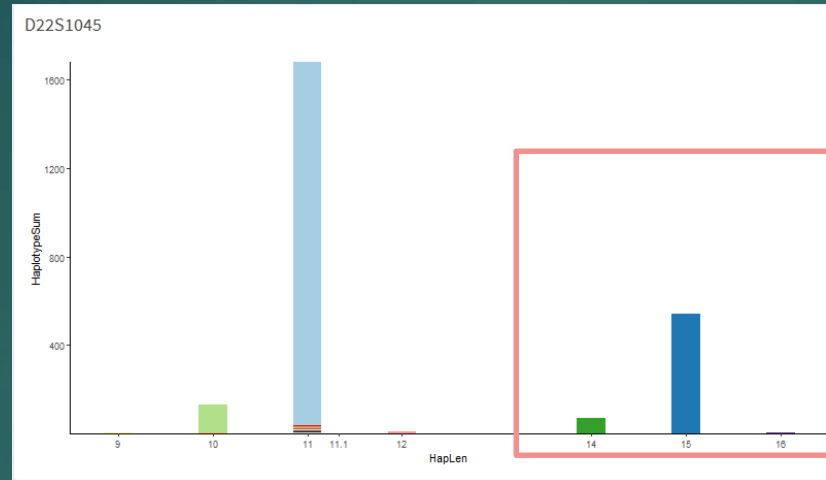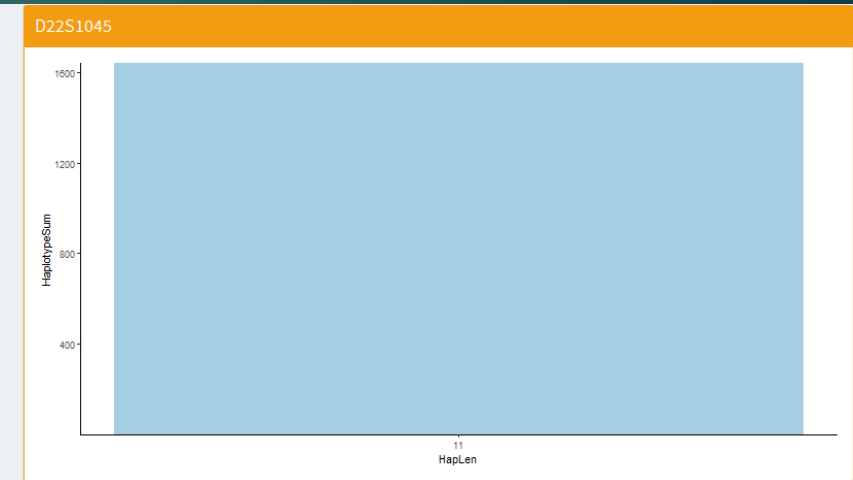

Warning

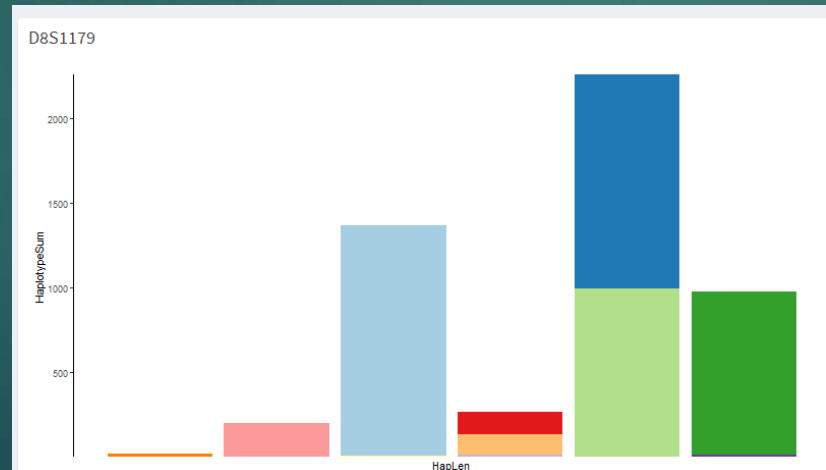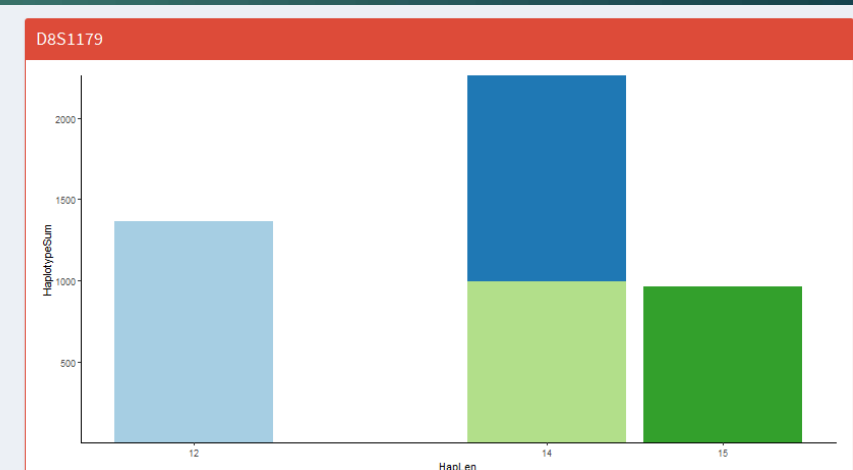



# STRAND *working group*

align | name | define

## ► Length-based Allele Calling

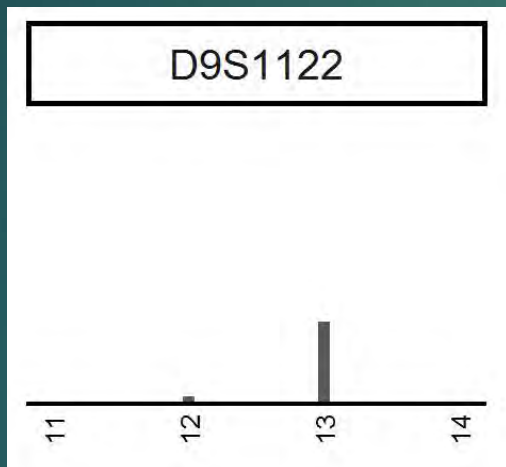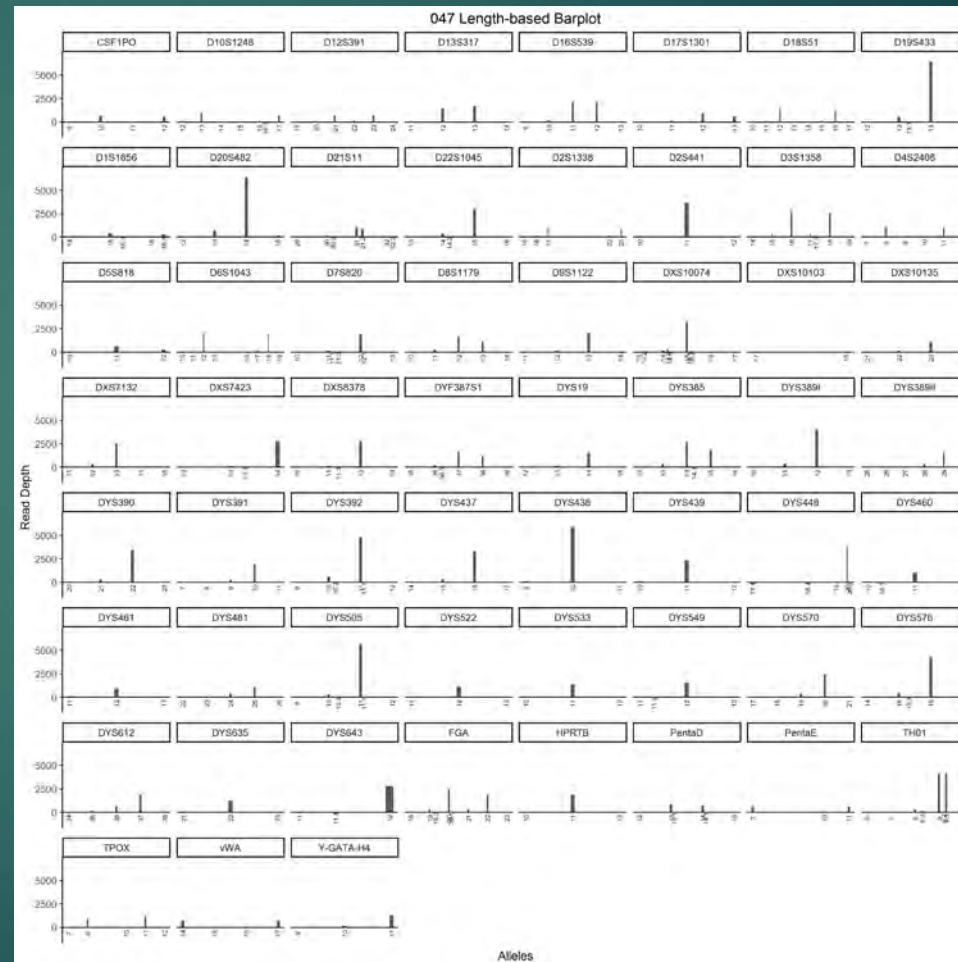



# STRAND *working group*

align | name | define

► Sequence-based

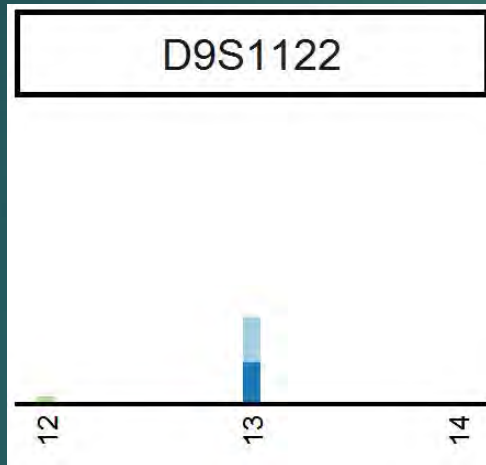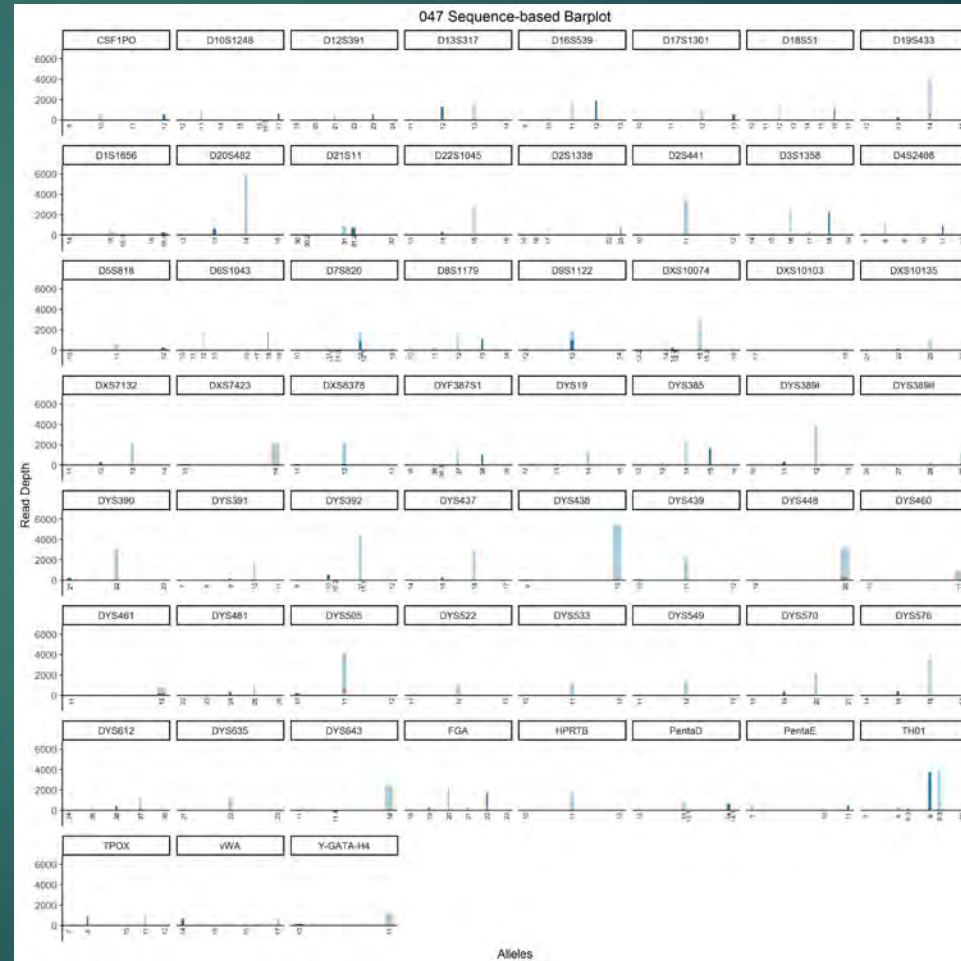

# STRAND *working group*

align | name | define

- ▶ Stutter Assessment
- ▶ Refine Levels
  - ▶ Locus
    - ▶ Most widely implemented
  - ▶ Length-based allele
    - ▶ Most widely studied
  - ▶ Haplotype
    - ▶ Most useful ultimately...(probably)





# STRAND *working group*

align | name | define

## ▶ D21S11

- ▶ PA: [TCTA]4 [TCTG]6 [TCTA]3 TA [TCTA]3 TCA [TCTA]2 TCCA TA [TCTA]9
  - ▶ [TCTA]4 [TCTG]6 [TCTA]3 TA [TCTA]3 TCA [TCTA]2 TCCA TA [TCTA]8
    - ▶ >6%
  - ▶ [TCTA]4 [TCTG]5 [TCTA]3 TA [TCTA]3 TCA [TCTA]2 TCCA TA [TCTA]9
    - ▶ >1%
  - ▶ [TCTA]3 [TCTG]6 [TCTA]3 TA [TCTA]3 TCA [TCTA]2 TCCA TA [TCTA]9
    - ▶ <1%
  - ▶ [TCTA]4 [TCTG]6 [TCTA]3 TA [TCTA]2 TCA [TCTA]2 TCCA TA [TCTA]9
    - ▶ <1%

# STRAND *working group*

align | name | define

## ► Understanding Error via Haplotype Networks

CSF1PO

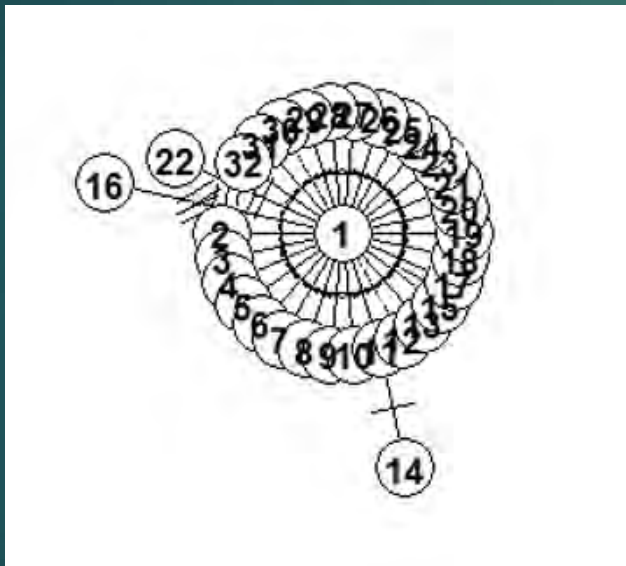

D19S433

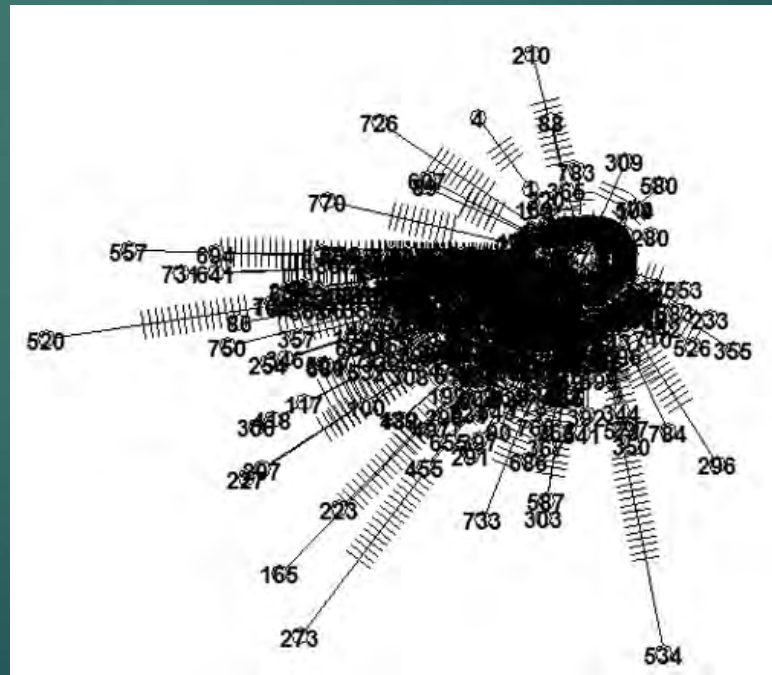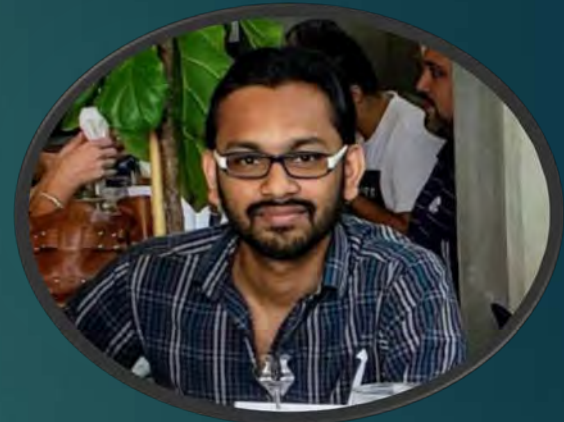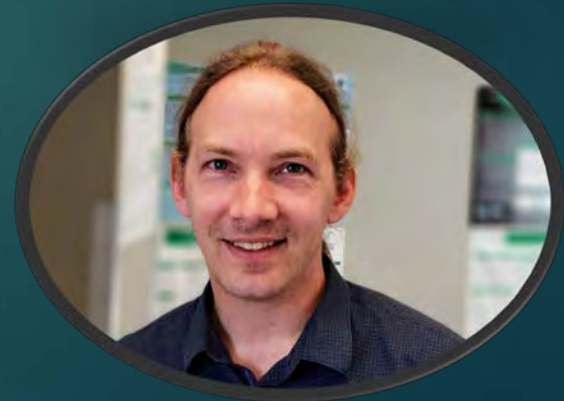

# STRAND *working group*

align | name | define

- ▶ Future Directions
  - ▶ Long-term vision of STRait Razor
    - ▶ Alignment-based
    - ▶ Dynamic flanking region processing/anchor assignment
    - ▶ Web interface



# STRAND *working group*

align | name | define

UNT Center for Human ID Research and Development Unit

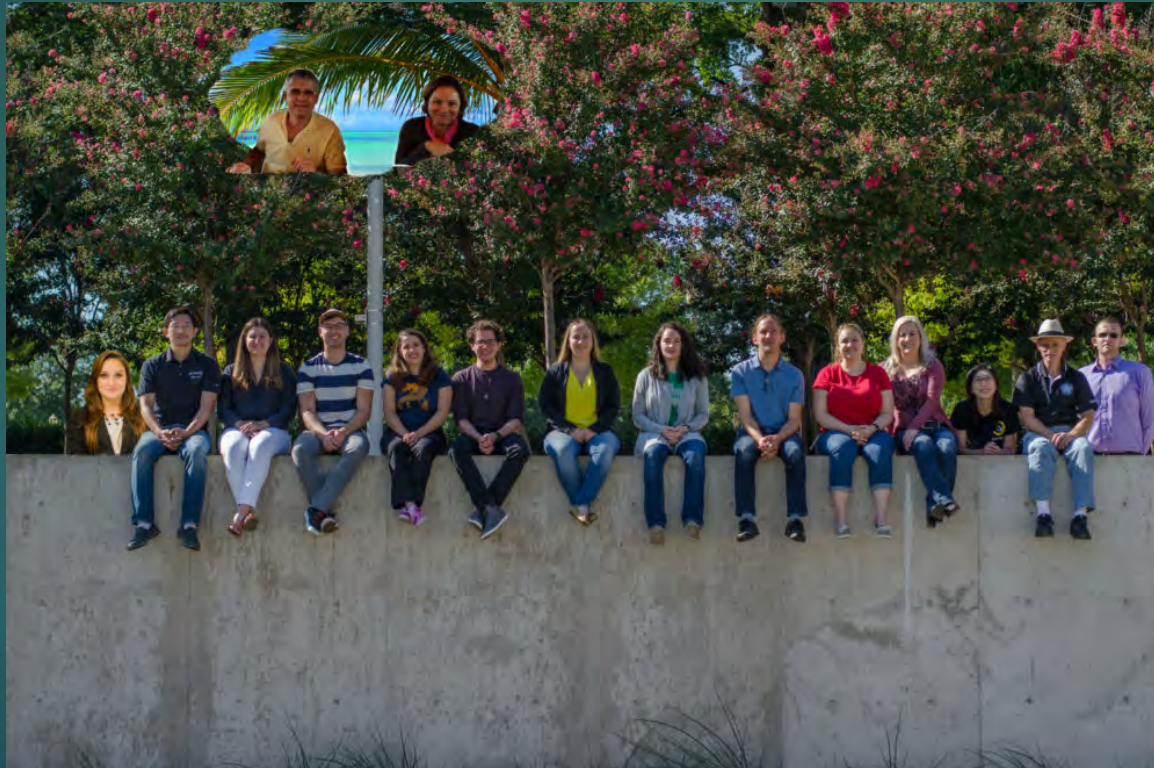

# STRAND *working group*

align | name | define

Chris Phillips



# Reference genomes, existing databases

GRCh38 has regular updates but no 'audits' reveal the sequence build or alignments for forensic STRs have changed

GRCh37 and GRCh 38 do have different sequence builds in one or two loci - most complex comparison of sequences is DXS10146

No distinction can be made between the fragments of duplication-inversion Y-STRs when we move away from the single strand RefSeq framework



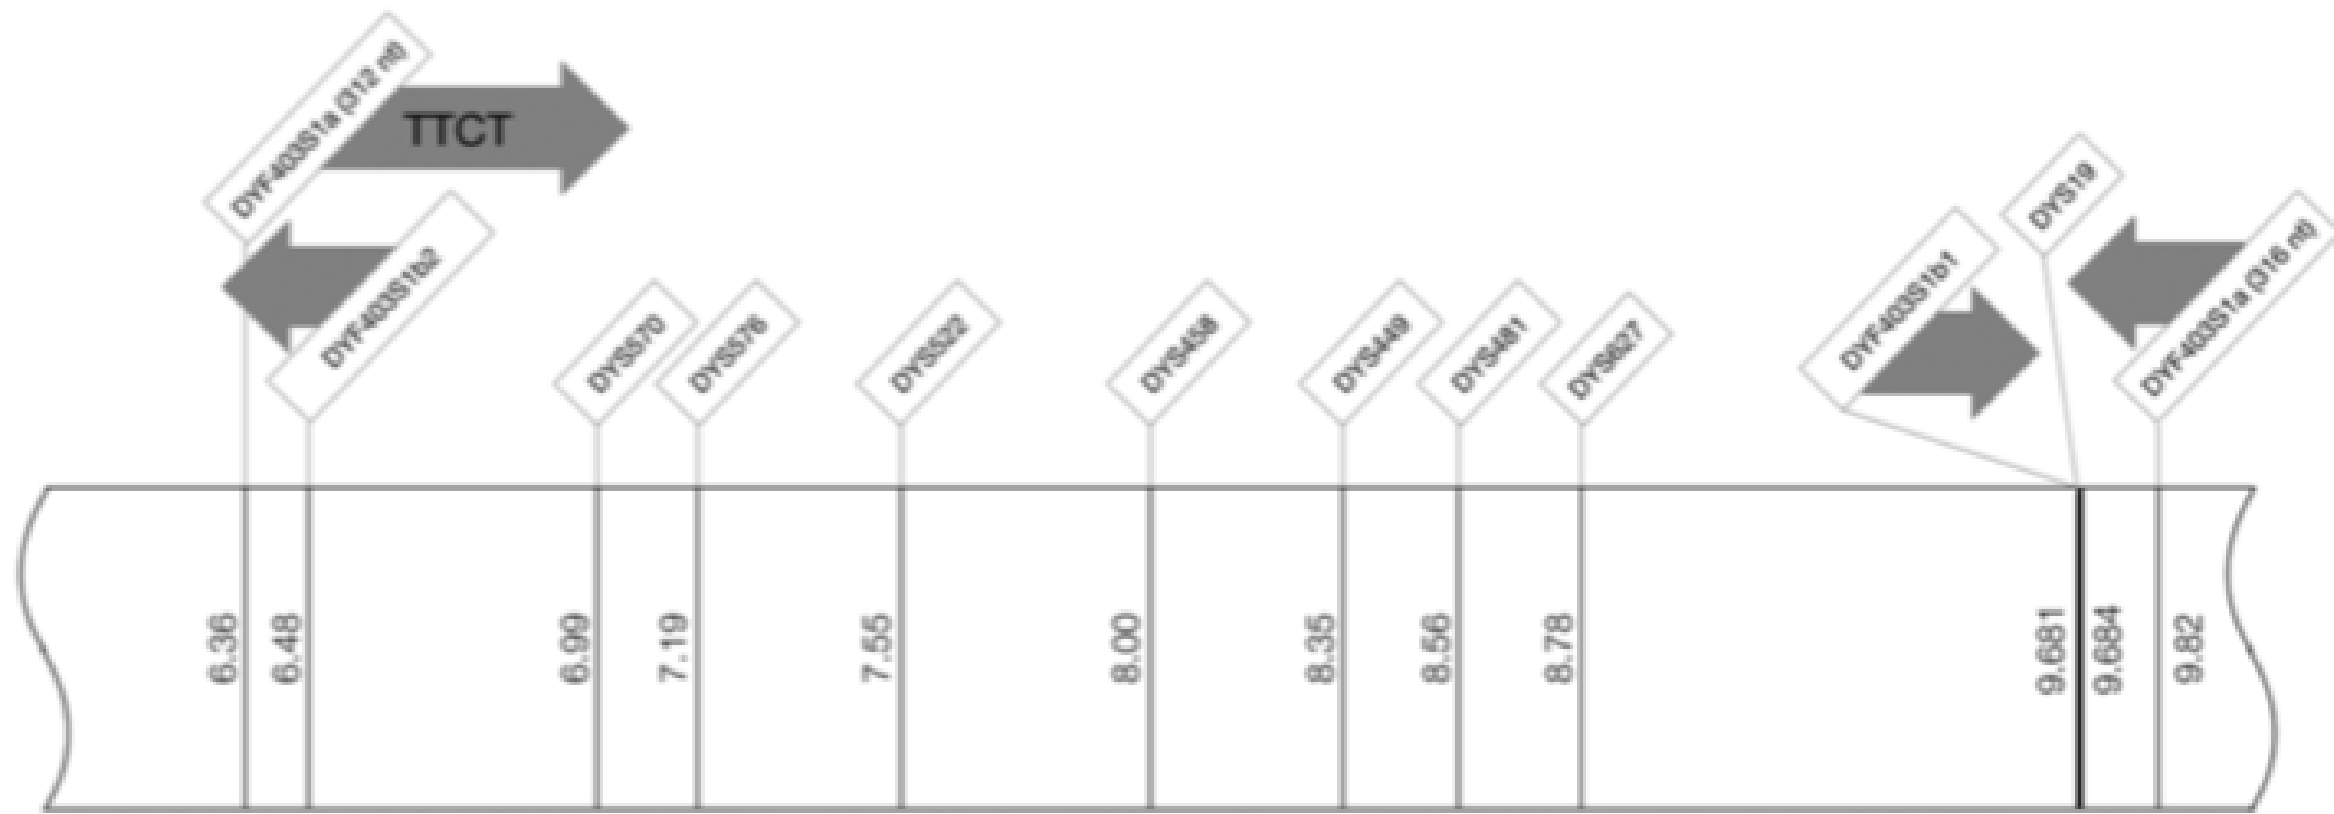

6 Mb

10 Mb

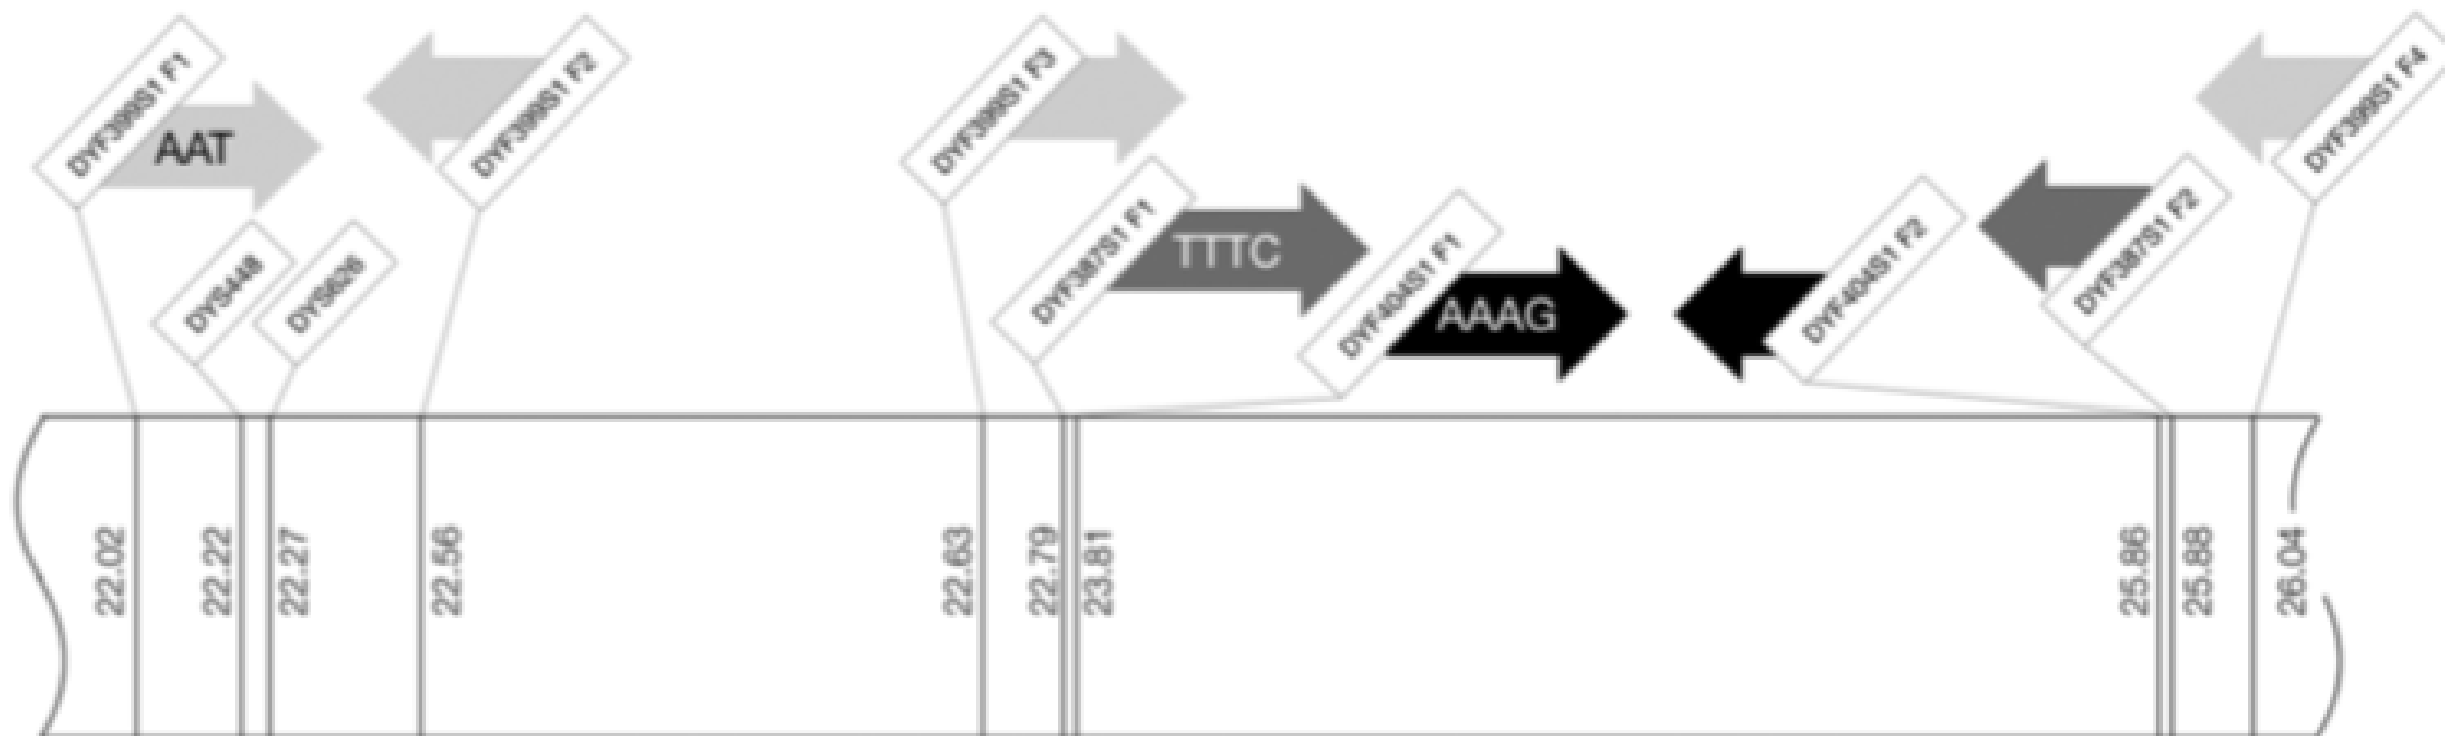

21.8 Mb

26.2 Mb

# Reference genomes, existing databases

GRCh38 has regular updates but no 'audits' reveal the sequence build or alignments for forensic STRs have changed

GRCh37 and GRCh 38 do have different sequence builds in one or two loci - most complex comparison of sequences is DXS10146

No distinction can be made between the fragments of duplication-inversion Y-STRs when we move away from the single strand RefSeq framework

Handling of insertions is quite low key when these are above a certain length

Short Indels can be insertions or deletions of the sequence element  
- this is rarely fixed in 1000 Genomes / dbSNP annotations

[A/-] is rarely given as [-/A]

[G/GA] rarely [GA/G]

longer sequence elements are given as insertions and this includes STR alleles when these are compiled in 1000 Genomes (not always)

|                 |    | GRCh 38 |         |         |         |         |         |         |         |         |         |         |         |         |                          |     |  |
|-----------------|----|---------|---------|---------|---------|---------|---------|---------|---------|---------|---------|---------|---------|---------|--------------------------|-----|--|
| minima reported |    | 1       | 2       | 3       | 4       | 5       | 6       | 7       | 8       | 9       | 10      | 11      | 12      | 13      | Repeat structure         | Rpt |  |
|                 |    | T C T A | T C T G | T C T A | T C T A | T C T A | T C T A | T C T A | T C T A | T C T A | T C T A | T C T A | T C T A | T C T A |                          |     |  |
| 8               | 1  | T C T A | T C T A | T C T A | T C T A | T C T A | T C T A | T C T A | T C T A | T C T A | T C T A | T C T A | T C T A | T C T A | [TCTA]8                  | 8   |  |
| 9               | 2  | T C T A | T C T A | T C T A | T C T A | T C T A | T C T A | T C T A | T C T A | T C T A | T C T A | T C T A | T C T A | T C T A | [TCTA]9                  | 9   |  |
| 10              | 3  | T C T A | T C T A | T C T A | T C T A | T C T A | T C T A | T C T A | T C T A | T C T A | T C T A | T C T A | T C T A | T C T A | [TCTA]10                 | 10  |  |
| 11              | 4  | T C T A | T C T A | T C T A | T C T A | T C T A | T C T A | T C T A | T C T A | T C T A | T C T A | T C T A | T C T A | T C T A | [TCTA]11                 | 11  |  |
| 11              | 5  | T C T A | T C T A | T C T G | T C T A | T C T A | T C T A | T C T A | T C T A | T C T A | T C T A | T C T A | T C T A | T C T A | [TCTA]2 TCTG [TCTA]8     | 11  |  |
| 11              | 6  | T C T A | T C T G | T C T A | T C T A | T C T A | T C T A | T C T A | T C T A | T C T A | T C T A | T C T A | T C T A | T C T A | TCTA TCTG [TCTA]9        | 11  |  |
| 12              | 7  | T C T A | T C T A | T C T A | T C T A | T C T A | T C T A | T C T A | T C T A | T C T A | T C T A | T C T A | T C T A | T C T A | [TCTA]12                 | 12  |  |
| 12              | 8  | T C T A | T C T A | T C T G | T C T A | T C T A | T C T A | T C T A | T C T A | T C T A | T C T A | T C T A | T C T A | T C T A | [TCTA]2 TCTG [TCTA]9     | 12  |  |
| 12              | 9  | T C T A | T C T G | T C T A | T C T A | T C T A | T C T A | T C T A | T C T A | T C T A | T C T A | T C T A | T C T A | T C T A | TCTA TCTG [TCTA]10       | 12  |  |
| 13              | 10 | T C T A | T C T A | T C T A | T C T A | T C T A | T C T A | T C T A | T C T A | T C T A | T C T A | T C T A | T C T A | T C T A | [TCTA]13                 | 13  |  |
| 13              | 11 | T C T A | T C T A | T C T G | T C T A | T C T A | T C T A | T C T A | T C T A | T C T A | T C T A | T C T A | T C T A | T C T A | [TCTA]2 TCTG [TCTA]10    | 13  |  |
| 13              | 12 | T C T A | T C T A | T C T G | T C T G | T C T A | T C T A | T C T A | T C T A | T C T A | T C T A | T C T A | T C T A | T C T A | [TCTA]2 [TCTG]2 [TCTA]9  | 13  |  |
| 13              | 13 | T C T A | T C T G | T C T A | T C T A | T C T A | T C T A | T C T A | T C T A | T C T A | T C T A | T C T A | T C T A | T C T A | TCTA TCTG [TCTA]11       | 13  |  |
| 14              | 14 | T C T A | T C T A | T C T A | T C T A | T C T A | T C T A | T C T A | T C T A | T C T A | T C T A | T C T A | T C T A | T C T A | [TCTA]14                 | 14  |  |
| 14              | 15 | T C T A | T C T A | T C T G | T C T A | T C T A | T C T A | T C T A | T C T A | T C T A | T C T A | T C T A | T C T A | T C T A | [TCTA]2 TCTG [TCTA]11    | 14  |  |
| 14              | 16 | T C T A | T C T G | T C T A | T C T A | T C T A | T C T A | T C T A | T C T A | T C T A | T C T A | T C T A | T C T A | T C T A | TCTA TCTG [TCTA]12       | 14  |  |
| 15              | 17 | T C T A | T C T A | T C T A | T C T A | T C T A | T C T A | T C T A | T C T A | T C T A | T C T A | T C T A | T C T A | T C T A | [TCTA]15                 | 15  |  |
| 15              | 18 | T C T A | T C T A | T C T G | T C T A | T C T A | T C T A | T C T A | T C T A | T C T A | T C T A | T C T A | T C T A | T C T A | [TCTA]2 TCTG [TCTA]12    | 15  |  |
| 15              | 19 | T C T A | T C T A | T C T G | T C T G | T C T A | T C T A | T C T A | T C T A | T C T A | T C T A | T C T A | T C T A | T C T A | [TCTA]2 [TCTG]2 [TCTA]11 | 15  |  |
| 15              | 20 | T C T A | T C T G | T C T A | T C T A | T C T A | T C T A | T C T A | T C T A | T C T A | T C T A | T C T A | T C T A | T C T A | TCTA TCTG [TCTA]13       | 15  |  |
| 16              | 21 | T C T A | T C T A | T C T G | T C T A | T C T A | T C T A | T C T A | T C T A | T C T A | T C T A | T C T A | T C T A | T C T A | [TCTA]2 TCTG [TCTA]13    | 16  |  |
| 16              | 22 | T C T A | T C T A | T C T G | T C T G | T C T A | T C T A | T C T A | T C T A | T C T A | T C T A | T C T A | T C T A | T C T A | [TCTA]2 [TCTG]2 [TCTA]12 | 16  |  |
| 16              | 23 | T C T A | T C T G | T C T A | T C T A | T C T A | T C T A | T C T A | T C T A | T C T A | T C T A | T C T A | T C T A | T C T A | TCTA TCTG [TCTA]14       | 16  |  |
| 16              | 24 | T C T A | T C T G | T C T G | T C T G | T C T A | T C T A | T C T A | T C T A | T C T A | T C T A | T C T A | T C T A | T C T A | TCTA [TCTG]3 [TCTA]12    | 16  |  |
| 17              | 25 | T C T A | T C T A | T C T G | T C T A | T C T A | T C T A | T C T A | T C T A | T C T A | T C T A | T C T A | T C T A | T C T A | [TCTA]2 TCTG [TCTA]14    | 17  |  |
| 17              | 26 | T C T A | T C T A | T C T G | T C T G | T C T A | T C T A | T C T A | T C T A | T C T A | T C T A | T C T A | T C T A | T C T A | [TCTA]2 [TCTG]2 [TCTA]13 | 17  |  |
| 18              | 27 | T C T A | T C T A | T C T G | T C T A | T C T A | T C T A | T C T A | T C T A | T C T A | T C T A | T C T A | T C T A | T C T A | [TCTA]2 TCTG [TCTA]15    | 18  |  |
| 18              | 28 | T C T A | T C T A | T C T G | T C T G | T C T A | T C T A | T C T A | T C T A | T C T A | T C T A | T C T A | T C T A | T C T A | [TCTA]2 [TCTG]2 [TCTA]14 | 18  |  |
| al framework    |    |         |         |         |         |         |         |         |         |         |         |         |         |         |                          |     |  |
| 8               | 1  | .       | .       | .       | .       | A       | .       | .       | .       | .       | .       | .       | .       | .       | .                        | .   |  |
| 9               | 2  | .       | .       | .       | .       | A       | .       | .       | .       | .       | .       | .       | .       | .       | .                        | .   |  |
| 10              | 3  | .       | .       | .       | .       | A       | .       | .       | .       | .       | .       | .       | .       | .       | .                        | .   |  |
| 11              | 4  | .       | .       | .       | .       | A       | .       | .       | .       | .       | .       | .       | .       | .       | .                        | .   |  |
| 11              | 5  | .       | .       | .       | .       | A       | .       | G       | .       | .       | .       | .       | .       | .       | .                        | .   |  |
| 11              | 6  | .       | .       | .       | .       | .       | .       | .       | .       | .       | .       | .       | .       | .       | .                        | .   |  |
| 12              | 7  | .       | .       | .       | .       | A       | .       | .       | .       | .       | .       | .       | .       | .       | .                        | .   |  |
| 12              | 8  | .       | .       | .       | .       | A       | .       | G       | .       | .       | .       | .       | .       | .       | .                        | .   |  |
| 12              | 9  | .       | .       | .       | .       | .       | .       | .       | .       | .       | .       | .       | .       | .       | .                        | .   |  |
| 13              | 10 | .       | .       | .       | .       | A       | .       | .       | .       | .       | .       | .       | .       | .       | .                        | .   |  |
| 13              | 11 | .       | .       | .       | .       | A       | .       | G       | .       | .       | .       | .       | .       | .       | .                        | .   |  |
| 13              | 12 | .       | .       | .       | .       | A       | .       | G       | .       | G       | .       | .       | .       | .       | .                        | .   |  |
| 13              | 13 | .       | .       | .       | .       | .       | .       | .       | .       | .       | .       | .       | .       | .       | .                        | .   |  |
| 14              | 14 | .       | .       | .       | .       | A       | .       | .       | .       | .       | .       | .       | .       | .       | .                        | .   |  |
| 14              | 15 | .       | .       | .       | .       | A       | .       | G       | .       | .       | .       | .       | .       | .       | .                        | .   |  |
| 14              | 16 | .       | .       | .       | .       | .       | .       | .       | .       | .       | .       | .       | .       | .       | .                        | .   |  |
| 15              | 17 | .       | .       | .       | .       | A       | .       | .       | .       | .       | .       | .       | .       | .       | .                        | .   |  |
| 15              | 18 | .       | .       | .       | .       | A       | .       | G       | .       | .       | .       | .       | .       | .       | .                        | .   |  |
| 15              | 19 | .       | .       | .       | .       | A       | .       | G       | .       | G       | .       | .       | .       | .       | .                        | .   |  |
| 15              | 20 | .       | .       | .       | .       | .       | .       | .       | .       | .       | .       | .       | .       | .       | .                        | .   |  |
| 16              | 21 | .       | .       | .       | .       | A       | .       | G       | .       | .       | .       | .       | .       | .       | .                        | .   |  |
| 16              | 22 | .       | .       | .       | .       | A       | .       | G       | .       | G       | .       | .       | .       | .       | .                        | .   |  |
| 16              | 23 | .       | .       | .       | .       | .       | .       | .       | .       | .       | .       | .       | .       | .       | .                        | .   |  |
| 16              | 24 | .       | .       | .       | .       | G       | .       | G       | .       | .       | .       | .       | .       | .       | .                        | .   |  |
| 17              | 25 | .       | .       | .       | .       | A       | .       | G       | .       | .       | .       | .       | .       | .       | .                        | .   |  |
| 17              | 26 | .       | .       | .       | .       | A       | .       | G       | .       | G       | .       | .       | .       | .       | .                        | .   |  |
| 18              | 27 | .       | .       | .       | .       | A       | .       | G       | .       | .       | .       | .       | .       | .       | .                        | .   |  |
| 18              | 28 | .       | .       | .       | .       | A       | .       | G       | .       | G       | .       | .       | .       | .       | .                        | .   |  |

CEPH  
D8S1179







# Reference genomes, existing databases

The two sets of co-ordinates and sequence linked to them won't change substantially

|                             |                                                                                                                                | D9S2157                                                                                                                                                                                                                                                                                                                                                                                            |   |   |   |   |   |   |   |   |    |
|-----------------------------|--------------------------------------------------------------------------------------------------------------------------------|----------------------------------------------------------------------------------------------------------------------------------------------------------------------------------------------------------------------------------------------------------------------------------------------------------------------------------------------------------------------------------------------------|---|---|---|---|---|---|---|---|----|
|                             |                                                                                                                                | 1                                                                                                                                                                                                                                                                                                                                                                                                  | 2 | 3 | 4 | 5 | 6 | 7 | 8 | 9 | 10 |
| Reference sequence          | C T G T C T C A A T                                                                                                            | A T A A T A A T A A T A A T A A T A A T A A T A A T A A T A A T A                                                                                                                                                                                                                                                                                                                                  |   |   |   |   |   |   |   |   |    |
| Flanking SNP IUPAC codes    |                                                                                                                                | A T A A T A A T A A T A A T A A T A A T A A T A A T A A T A A T A                                                                                                                                                                                                                                                                                                                                  |   |   |   |   |   |   |   |   |    |
| GRCh38 coordinates          | 133160272<br>133160273<br>133160274<br>133160275<br>133160276<br>133160277<br>133160278<br>133160279<br>133160280<br>133160281 | 133160282<br>133160283<br>133160284<br>133160285<br>133160286<br>133160287<br>133160288<br>133160289<br>133160290<br>133160291<br>133160292<br>133160293<br>133160294<br>133160295<br>133160296<br>133160297<br>133160298<br>133160299<br>133160300<br>133160301<br>133160302<br>133160303<br>133160304<br>133160305<br>133160306<br>133160307<br>133160308<br>133160309<br>133160310<br>133160311 |   |   |   |   |   |   |   |   |    |
| GRCh37 coordinates          | 136035659<br>136035660<br>136035661<br>136035662<br>136035663<br>136035664<br>136035665<br>136035666<br>136035667<br>136035668 | 136035669<br>136035670<br>136035671<br>136035672<br>136035673<br>136035674<br>136035675<br>136035676<br>136035677<br>136035678<br>136035679<br>136035680<br>136035681<br>136035682<br>136035683<br>136035684<br>136035685<br>136035686<br>136035687<br>136035688<br>136035689<br>136035690<br>136035691<br>136035692<br>136035693<br>136035694<br>136035695<br>136035696<br>136035697<br>136035698 |   |   |   |   |   |   |   |   |    |
| Distance from repeat region | 10<br>9<br>8<br>7<br>6<br>5<br>4<br>3<br>2<br>1                                                                                | 1<br>2<br>3<br>4<br>5<br>6<br>7<br>8<br>9<br>10                                                                                                                                                                                                                                                                                                                                                    |   |   |   |   |   |   |   |   |    |

We can accommodate whatever framework for defining the repeat region we agree to



# Reference genomes, existing databases

Databases of genomic details pertinent to a variant

Sequence databases generally compile good quality data for SNPs/Indels

STR structure data is poor - description and detail varies between loci

There may be a need to systematise some forensic STR locus names (e.g. FGA) - less regularised than SNPs/Indels, so locating novel loci very difficult

Databases of the population variation observed in a variant

In last two years >10K genome projects have found many rare variants

No STR sequence variation database exists - we will have to build our own

Forensic STR databases of CE-alleles have functioned well up to now

*STR.Base popSTR ALFRED*

# Databases of genomic details pertinent to a variant

## Databases of the population variation observed in a variant

### Maps of clustered variants:

STRs and their accompanying flanking SNPs

Multiple STRs in close proximity

Indels that might influence CE size estimates

Arrangement of multiple fragment STRs

Ensembl

NCBI Genbank

STR-specific

BioProjects

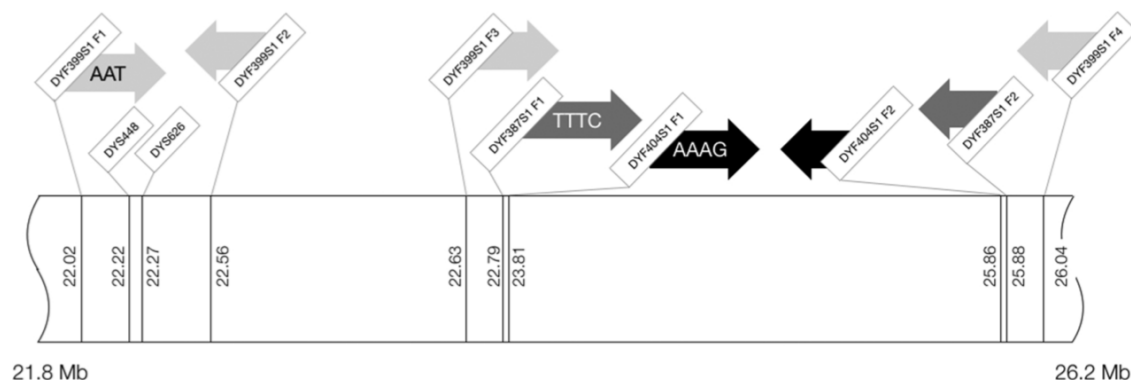

### Gauging linkage between close STRs:

HapMap

cM estimates of syntenic loci

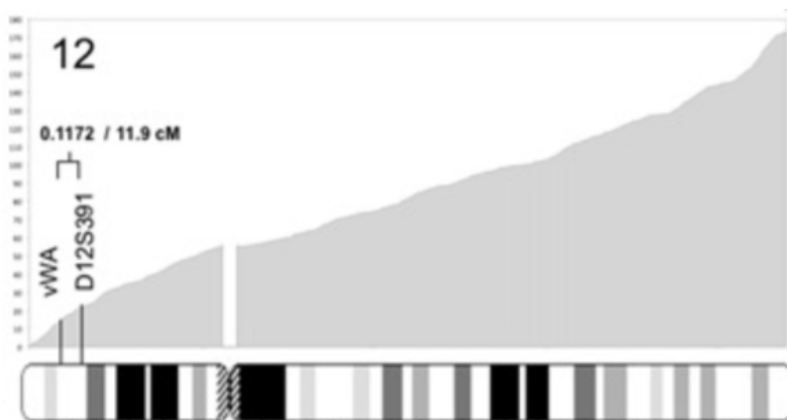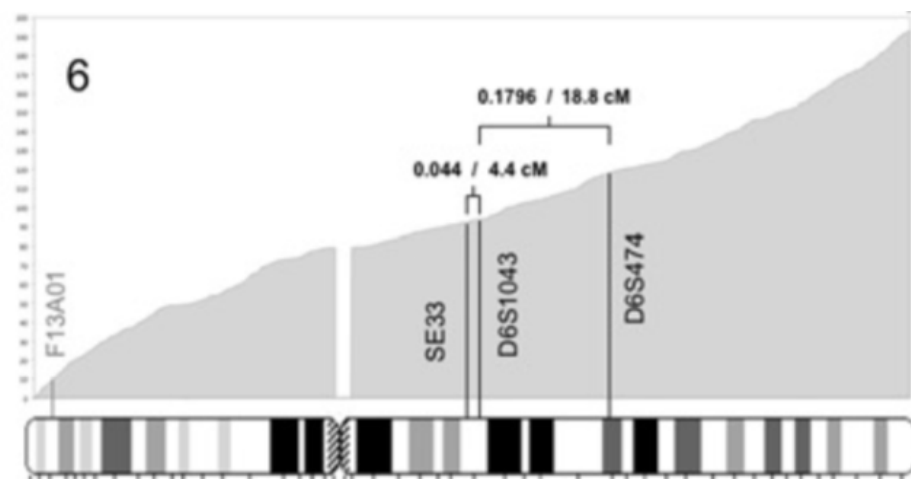

### Identifying less well established STRs as unique

NCBI Probe

D5S2500 (in a CE kit) vs D5S2800 (in an MPS kit)

| Chrom. | Core STRs | dbSNP rs-number identifier for STR | Chrom. | Supplementary STRs | Kit            | dbSNP rs-number identifier for STR |
|--------|-----------|------------------------------------|--------|--------------------|----------------|------------------------------------|
| C1     | D1S1656   | rs113633160                        | C1     | F13B               | Promega CS7    | rs10643350                         |
| C2     | TPOX      | rs113475620                        | C2     | D2S1360            | Qiagen HD-plex | rs113680434                        |
| C2     | D2S1338   | rs112111672                        |        |                    |                |                                    |
| C2     | D2S441    | rs10203882                         |        |                    |                |                                    |
| C3     | D3S1358   | rs111694514                        | C3     | D3S1744            | Qiagen HD-plex | rs113865588                        |
| C4     | FGA       | rs67296980                         | C4     | D4S2366            | Qiagen HD-plex | rs113820309                        |
| C5     | D5S818    | rs112497490                        | C5     | D5S2500            | Qiagen HD-plex | rs111362704                        |
| C5     | CSF1PO    | rs113729910                        |        |                    |                |                                    |
| C6     | SE33      | rs71021371                         | C6     | D6S474             | Qiagen HD-plex | rs113991233                        |
| C7     | D7S820    | rs112714641                        | C7     | D7S1517            | Qiagen HD-plex | rs112397288                        |
| C8     | D8S1179   | rs67563232                         | C8     | D8S1132            | Qiagen HD-plex | rs71307053                         |
|        |           |                                    | C9     | Penta C            | Promega CS7    | rs72398274                         |
| C10    | D10S1248  | rs113518246                        | C10    | D10S2325           | Qiagen HD-plex | no SNPs found                      |
| C11    | TH01      | rs71029110                         |        |                    |                |                                    |
| C12    | D12S391   | rs113002069                        |        |                    |                |                                    |
| C12    | vWA       | rs10579907                         |        |                    |                |                                    |
| C13    | D13S317   | rs111980288                        |        |                    |                |                                    |
| C15    | Penta E   | rs8036258                          | C15    | FES-FPS            | Promega CS7    | rs6229                             |
| C16    | D16S539   | rs112689398                        |        |                    |                |                                    |
| C18    | D18S51    | rs10560567                         |        |                    |                |                                    |
| C19    | D19S433   | rs113951851                        |        |                    |                |                                    |
| C21    | D21S11    | rs113145752                        | C21    | D21S2055           | Qiagen HD-plex | rs113225349                        |
| C21    | Penta D   | rs7279663                          |        |                    |                |                                    |
| C22    | D22S1045  | rs112790319                        |        |                    |                |                                    |

# Databases of genomic details pertinent to a variant

## Databases of the population variation observed in a variant

### Maps of clustered variants:

STRs and their accompanying flanking SNPs

Multiple STRs in close proximity

Indels that might influence CE size estimates

Arrangement of multiple fragment STRs

*Ensembl*

*NCBI Genbank*

*STR-specific  
BioProjects*



### Gauging linkage between close STRs:

*HapMap*

cM estimates of syntenic loci

### Identifying less well established STRs as unique

*NCBI Probe*

D5S2500 (in a CE kit) vs D5S2800 (in an MPS kit)

### Agreement to use the RefSeq reference strand:

5' to 3' single sequence with fixed coordinates for both current builds

Consensus amongst MPS users for loci and level of detail

Consensus amongst STRAND members for each STR's START-END nucleotides and repeat region structures

*STR  
Sequence  
Guide*

*Guide  
Wiki  
Database*

*'Red-point' SNPs  
Mobility-shift SNPs  
Rare 4-nt Indels*

✓ Flanking variants even at low frequency are easy to compile

STRSeq compiling full sequences including flanks

dbSNP is accelerating the uptake of Indels and assignment of rs-numbers

1000 genomes is now supplemented by gnomAD / TOPMed - tens of thousands of samples



Databases of genomic details pertinent to a variant

Databases of the population variation observed in a variant

dbSNP is undergoing a transition in presentation and scope to accommodate many more rare SNPs identified by >10,000 sample projects

NIH U.S. National Library of Medicine  
National Center for Biotechnology Information

**dbSNP** Short Genetic Variations

Search for rs  Search  
Example: rs268

Reference SNP (rs) Report Download Facebook Twitter YouTube

[Switch to classic site](#)

**rs12913832** **Current Build 152**  
Released October 2, 2018

|                         |                                                                                                                            |                              |                                     |
|-------------------------|----------------------------------------------------------------------------------------------------------------------------|------------------------------|-------------------------------------|
| <b>Organism</b>         | <i>Homo sapiens</i>                                                                                                        | <b>Clinical Significance</b> | Reported in <a href="#">ClinVar</a> |
| <b>Position</b>         | chr15:28120472 (GRCh38.p12) <a href="#">?</a>                                                                              | <b>Gene : Consequence</b>    | HERC2 : Intron Variant              |
| <b>Alleles</b>          | A>G                                                                                                                        | <b>Publications</b>          | 92 citations                        |
| <b>Variation Type</b>   | SNV Single Nucleotide Variation                                                                                            | <b>Genomic View</b>          | <a href="#">See rs on genome</a>    |
| <b>Allele Frequency</b> | G=0.45329 (56919/125568, TOPMED)<br>A=0.4419 (13667/30926, GnomAD)<br>G=0.177 (888/5008, 1000G) <a href="#">(+ 3 more)</a> |                              |                                     |

**gnomAD**  
genome aggregation database

No results found

gnomAD Genome Aggregation Database

NHLBI Trans-Omics for Precision Medicine

Centers Projects/Studies Working Groups Data Publications EAP ELSI Workshops

About TOPMed

- Contents
- Overview
  - Study Characteristics
    - Study Designs
    - Participant Diversity
  - Whole Genome Sequencing
  - Resources for the Scientific Community

TOPMed Trans-Omics for Precision Medicine



### rs1051822965 SNP

Most severe consequence

[Intron variant](#) | [See all predicted consequences](#)

Alleles

C/G | Ancestral: C | Highest population MAF: < 0.01

Change tolerance

CADD: G:3.952 | GERP: -3.35

Location

Chromosome 11:2171074 (forward strand) | VCF: 11 2171074 rs1051822965 C G

Evidence status

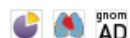

HGVS names

This variant has 10 HGVS names - [Show](#)

Synonyms

ClinGen Allele Registry [CA216229061](#) (G)

Original source

Variants (including SNPs and indels) imported from dbSNP (release 151) | [View in dbSNP](#)

About this variant

This variant overlaps [6 transcripts](#).

|             |                        |                    |
|-------------|------------------------|--------------------|
| gnomADg:ALL | C: 0.999899112 (29733) | G: 0.000100888 (3) |
| gnomADg:af  | C: 0.999635569 (8229)  | G: 0.000364431 (3) |
| gnomADg:amr | C: 1.000 (832)         | G: 0.000           |
| gnomADg:asj | C: 1.000 (264)         | G: 0.000           |
| gnomADg:eas | C: 1.000 (1412)        | G: 0.000           |
| gnomADg:fin | C: 1.000 (3432)        | G: 0.000           |
| gnomADg:nfe | C: 1.000 (14546)       | G: 0.000           |
| gnomADg:oth | C: 1.000 (1018)        | G: 0.000           |

|                                                |                             |
|------------------------------------------------|-----------------------------|
| [AATG]n ATG [AATG]n                            | TH01                        |
| above does not describe the reference sequence | Reference sequence          |
|                                                | Flanking SNP IUPAC codes    |
| Chr: 11                                        | GRCh38 coordinates          |
|                                                | GRCh37 coordinates          |
|                                                | Distance from repeat region |

| 1       | 2       | 3       | 4       | 5       | 6       | 7       |
|---------|---------|---------|---------|---------|---------|---------|
| A A T G | A A T G | A A T G | A A T G | A A T G | A A T G | A A T G |
| A A T G | A A T G | A A T G | A A T G | A A T G | A A T G | A A T G |
| 2171088 | 2171089 | 2171090 | 2171091 | 2171092 | 2171093 | 2171094 |
| 2192318 | 2192319 | 2192320 | 2192321 | 2192322 | 2192323 | 2192324 |
| 1       | 2       | 3       | 4       | 5       | 6       | 7       |
| 1       | 2       | 3       | 4       | 5       | 6       | 7       |

# TOPMed and 'red-point' (very rare) SNPs

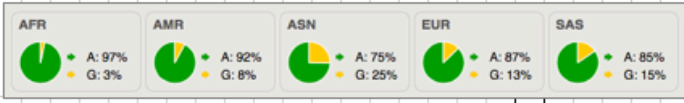

|                                      |                             |
|--------------------------------------|-----------------------------|
| [TAGA]n [CAGA]n TAGA                 | VWA                         |
| (reverse sequence listed in STRbase) | Reference sequence          |
|                                      | Flanking SNP IUPAC codes    |
| Chr: 12                              | GRCh38 coordinates          |
|                                      | GRCh37 coordinates          |
|                                      | Distance from repeat region |

| 1       | 2       | 3       | 4       | 5       | 6       | 7       | 8       | 9       |
|---------|---------|---------|---------|---------|---------|---------|---------|---------|
| T A G A | T A G A | T A G A | T A G A | T A G A | T A G A | T A G A | T A G A | T A G A |
| T A G A | T A G A | T A G A | T A G A | T A G A | T A G A | T A G A | T A G A | T A G A |
| 5983936 | 5983937 | 5983938 | 5983939 | 5983940 | 5983941 | 5983942 | 5983943 | 5983944 |
| 6093102 | 6093103 | 6093104 | 6093105 | 6093106 | 6093107 | 6093108 | 6093109 | 6093110 |
| 1       | 2       | 3       | 4       | 5       | 6       | 7       | 8       | 9       |
| 1       | 2       | 3       | 4       | 5       | 6       | 7       | 8       | 9       |

### rs771794429 SNP

gnomAD Genome Aggregation Database

Most severe consequence

[Intron variant](#) | [See all predicted consequences](#)

Alleles

G/A | Ancestral: G | MAF: 0.01 (A) | Highest population MAF: < 0.01

Change tolerance

CADD: A:1.395 | GERP: -2.86

Location

Chromosome 12:5983962 (forward strand) | VCF: 12 5983962 rs771794429 G A

Evidence status

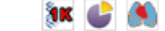

HGVS names

This variant has 4 HGVS names - [Show](#)

Synonyms

ClinGen Allele Registry [CA232291691](#) (A)

Original source

Variants (including SNPs and indels) imported from dbSNP (release 151) | [View in dbSNP](#)

About this variant

|            |                 |              |
|------------|-----------------|--------------|
| gnomADg:af | G: 0.999 (8041) | A: 0.001 (5) |
|------------|-----------------|--------------|

### rs199970098 SNP

TOPMed Trans-Omics for Precision Medicine Program

Most severe consequence

[Intron variant](#) | [See all predicted consequences](#)

Alleles

G/A | Ancestral: A | Highest population MAF: 0.01

Change tolerance

CADD: A:0.041 | GERP: -3.74

Location

Chromosome 12:5983974 (forward strand) | VCF: 12 5983974 rs199970098 G A

Evidence status

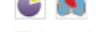

HGVS names

This variant has 4 HGVS names - [Show](#)

Synonyms

ClinGen Allele Registry [CA232291705](#) (A)

Original source

Variants (including SNPs and indels) imported from dbSNP (release 151) | [View in dbSNP](#)

About this variant

|        |          |          |
|--------|----------|----------|
| TOPMed | G: 0.985 | A: 0.015 |
|--------|----------|----------|



# STR Flanking Region Variation

David Ballard – King's College London

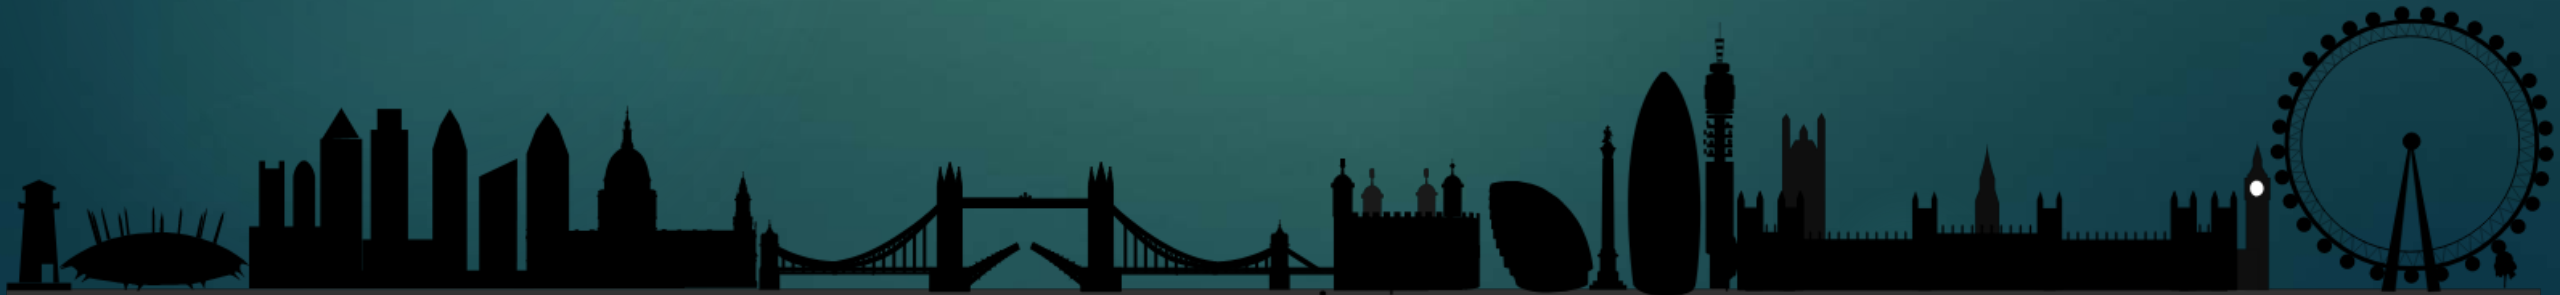

# D16S539 – Known Flanking SNP Variation

|          |          |          |          |          |          |          |          |          |          |          |          |          |          |          |          | AFR           |          |          |          |          | AMR      |          |          |          |          | ASN      |          |          |          |          | EUR      |          |          |          |          | SAS      |          |          |          |          |          |          |          |          |          |          |   |  |  |  |
|----------|----------|----------|----------|----------|----------|----------|----------|----------|----------|----------|----------|----------|----------|----------|----------|---------------|----------|----------|----------|----------|----------|----------|----------|----------|----------|----------|----------|----------|----------|----------|----------|----------|----------|----------|----------|----------|----------|----------|----------|----------|----------|----------|----------|----------|----------|----------|---|--|--|--|
|          |          |          |          |          |          |          |          |          |          |          |          |          |          |          |          |               |          |          |          |          |          |          |          |          |          |          |          |          |          |          |          |          |          |          |          |          |          |          |          |          |          |          |          |          |          |          |   |  |  |  |
|          |          |          |          |          |          |          |          |          |          |          |          |          |          |          |          | 9             |          |          |          |          | 10       |          |          |          |          | 11       |          |          |          |          |          |          |          |          |          |          |          |          |          |          |          |          |          |          |          |          |   |  |  |  |
|          |          |          |          |          |          |          |          |          |          |          |          |          |          |          |          | A T A G A T A |          |          |          |          | G A T A  |          |          |          |          | G A T A  |          |          |          |          |          |          |          |          |          |          |          |          |          |          |          |          |          |          |          |          |   |  |  |  |
|          |          |          |          |          |          |          |          |          |          |          |          |          |          |          |          | A T A G A T A |          |          |          |          | G A T A  |          |          |          |          | G A T A  |          |          |          |          |          |          |          |          |          |          |          |          |          |          |          |          |          |          |          |          |   |  |  |  |
| 86386337 | 86386338 | 86386339 | 86386340 | 86386341 | 86386342 | 86386343 | 86386344 | 86386345 | 86386346 | 86386347 | 86386348 | 86386349 | 86386350 | 86386351 | 86386352 | 86386353      | 86386354 | 86386355 | 86386356 | 86386357 | 86386358 | 86386359 | 86386360 | 86386361 | 86386362 | 86386363 | 86386364 | 86386365 | 86386366 | 86386367 | 86386368 | 86386369 | 86386370 | 86386371 | 86386372 | 86386373 | 86386374 | 86386375 | 86386376 | 86386377 | 86386378 | 86386379 | 86386380 | 86386381 | 86386382 | 86386383 |   |  |  |  |
|          |          |          |          |          |          |          |          |          |          |          |          |          |          |          |          | T             | C        | A        | T        | T        | G        | A        | A        | A        | G        | A        | C        | A        | A        | A        | A        | C        | A        | G        | A        | G        | A        | T        | G        | G        | A        | T        | G        | A        | T        | A        | G |  |  |  |
|          |          |          |          |          |          |          |          |          |          |          |          |          |          |          |          | <b>M</b>      |          |          |          |          |          |          |          |          |          |          |          |          |          |          |          |          |          |          |          |          |          |          |          |          |          |          |          |          |          |          |   |  |  |  |
|          |          |          |          |          |          |          |          |          |          |          |          |          |          |          |          | rs11642858    |          |          |          |          |          |          |          |          |          |          |          |          |          |          |          |          |          |          |          |          |          |          |          |          |          |          |          |          |          |          |   |  |  |  |

# D16S539 – Expected frequency of alleles using flanking sequence

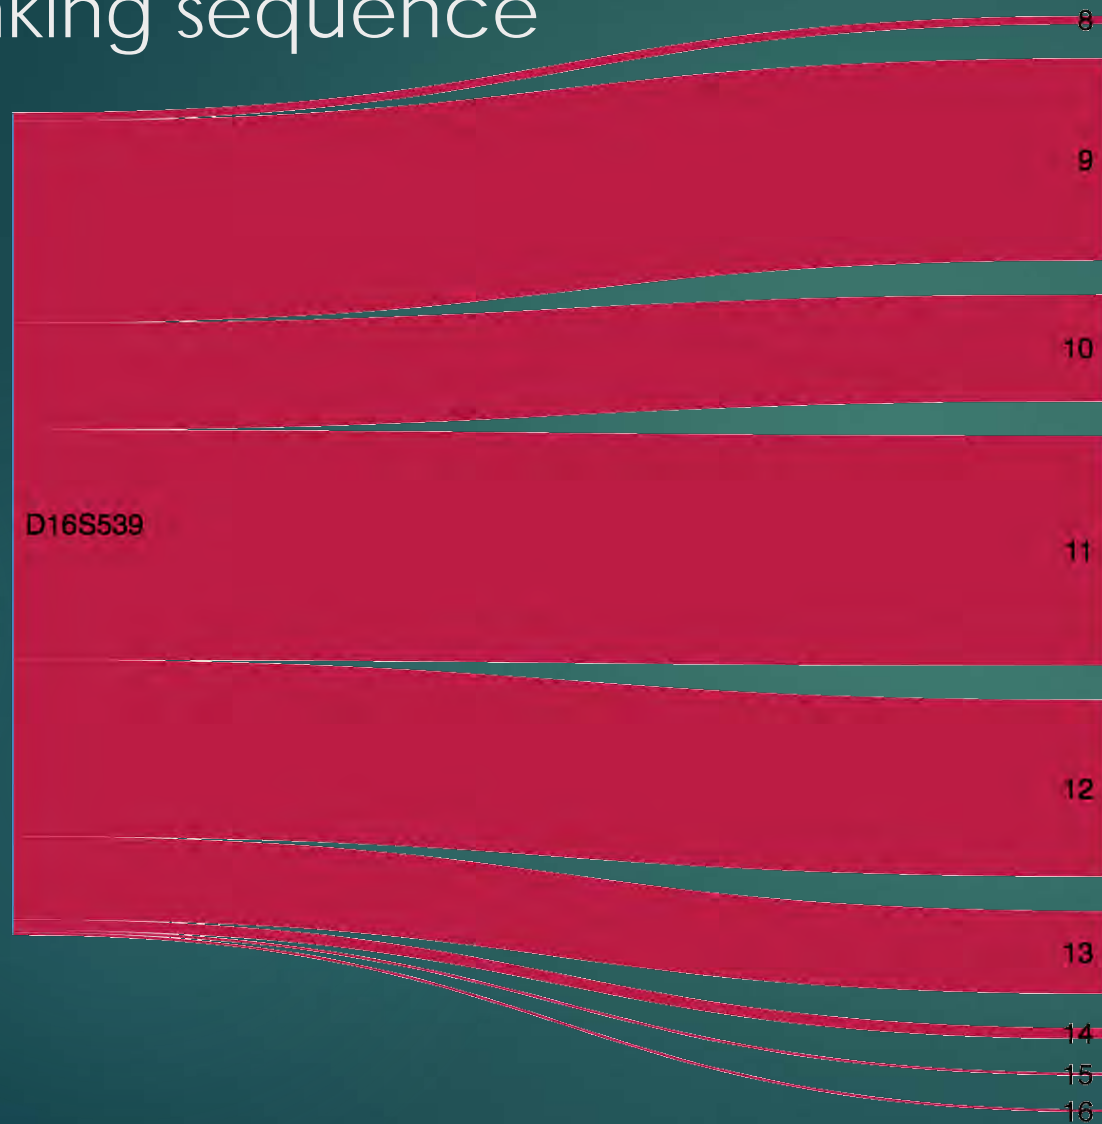

# D16S539 – Expected frequency of alleles using flanking sequence

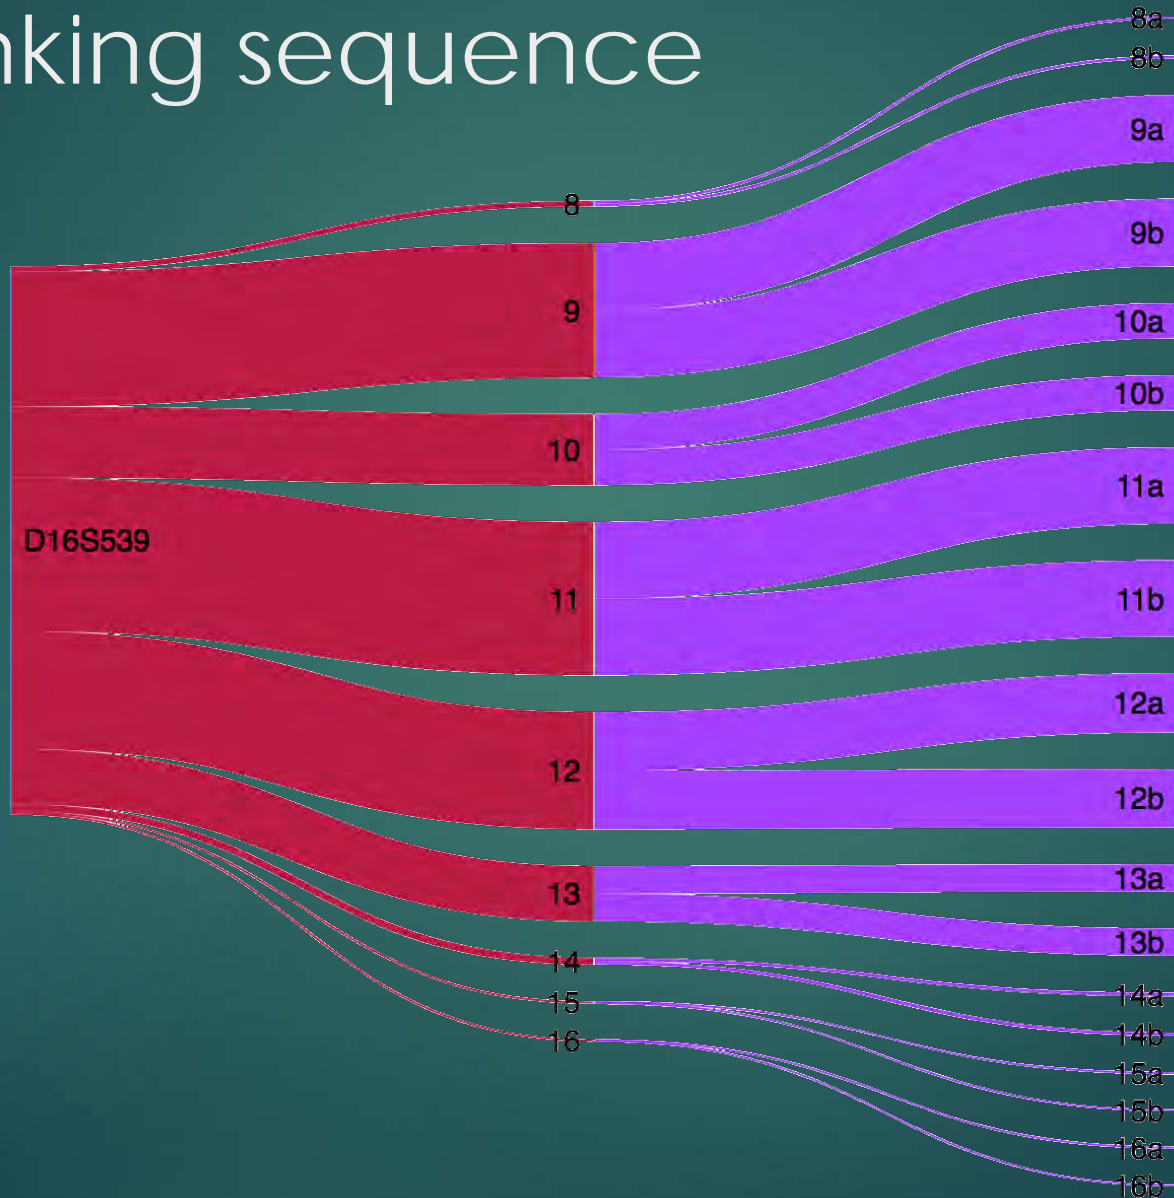



# D16S539 – Actual frequency of alleles using flanking sequence

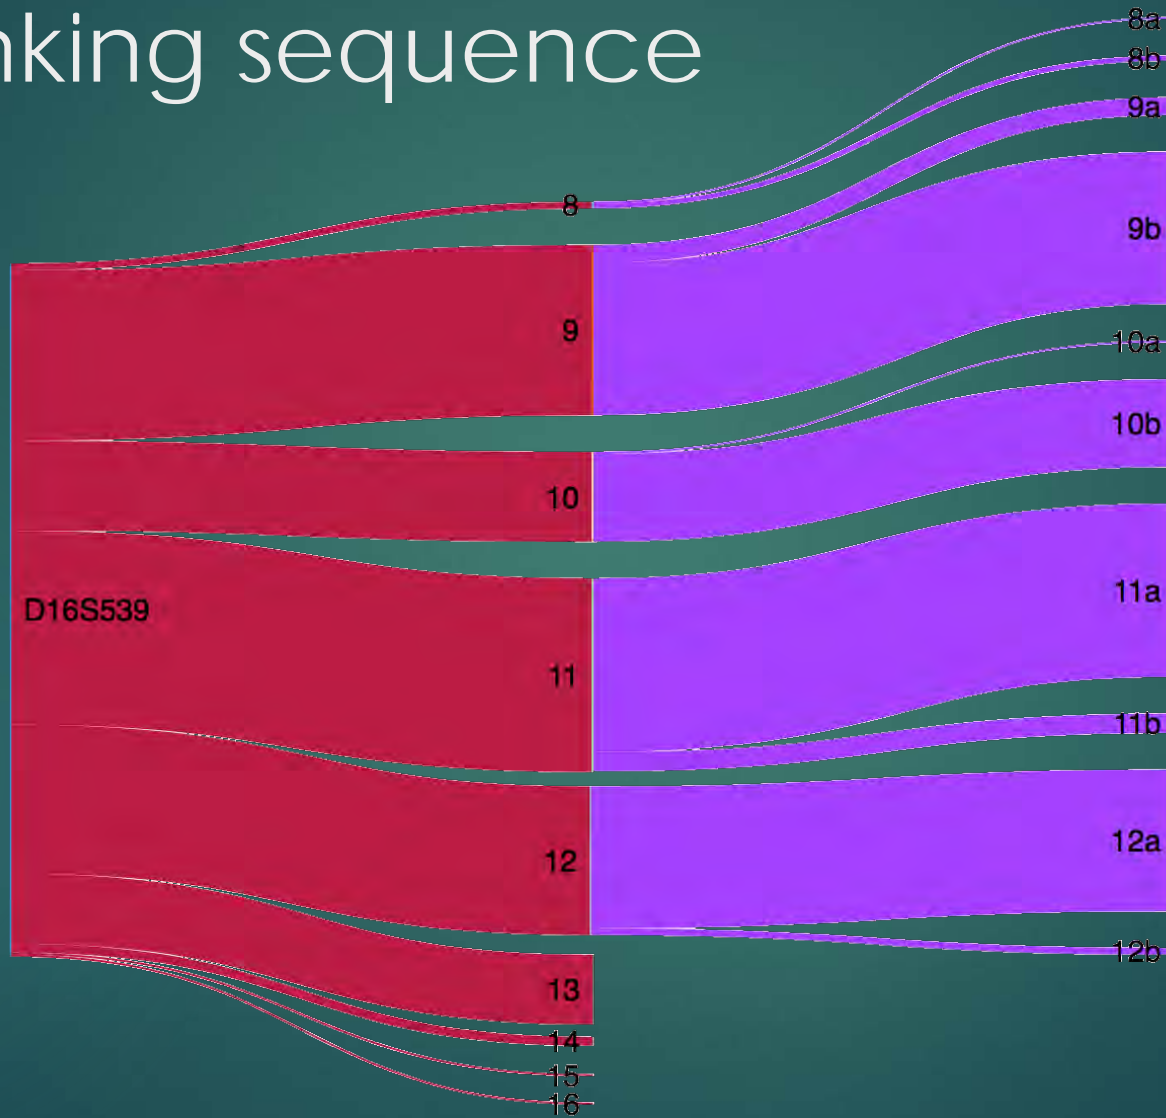

# D16S539 – Why isn't the flanking region helping?

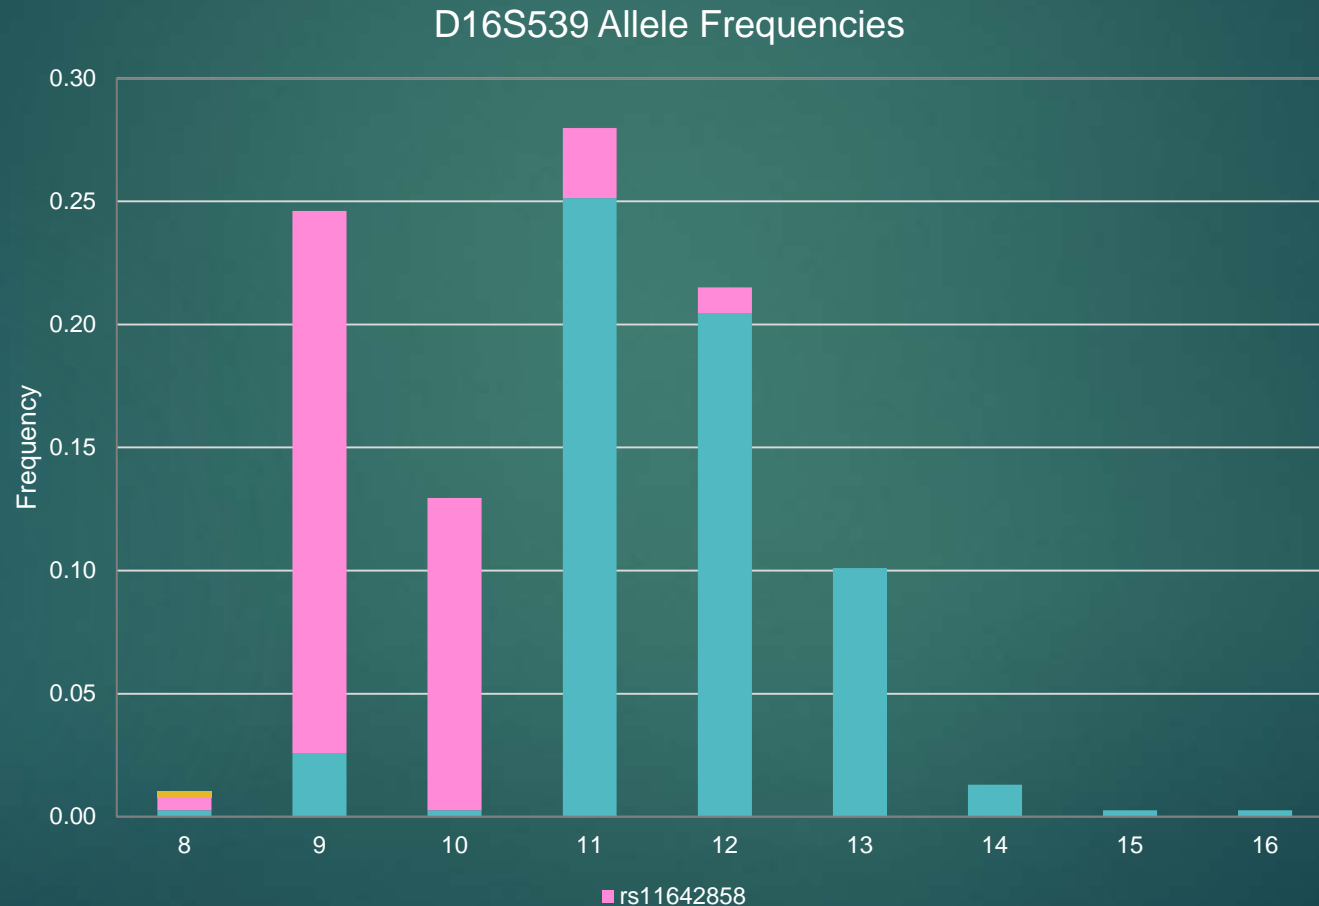

# STR nomenclature



# To consider?

- For discrimination purposes, extended flanking region variation is of limited use due to linkage with specific STR repeat sequence alleles
- A nomenclature system just describing the repeat region (or a defined region around the repeat) would be simple and capture almost all of the useful variation
- A collection of all common STR sequence allele variation is already available



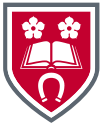

UNIVERSITY OF  
LEICESTER

# STR Sequence Nomenclature – The view from Leicester

Tunde Huszar

*University of Leicester*

*Alec Jeffreys Forensic Genomics Unit*

*Department of Genetics and Genome Biology*

*Leicester, UK*

*th201@leicester.ac.uk*

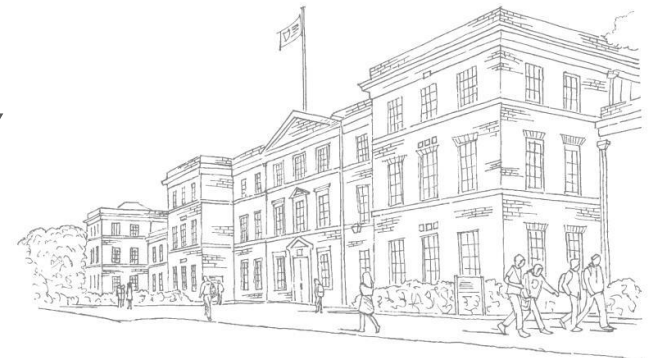

# STR Sequence Nomenclature

- ✓ Lessons from a phylogenetic framework for Y-STRs
- ✓ Existing databases – using STRSeq
- ✓ Local database – LeiceSTRSeq

# Phylogenetic framework

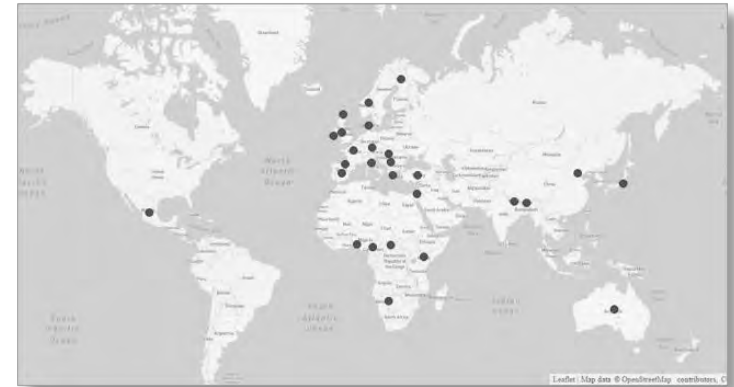

✓ variable array limits:

- DYS385a,b
- DYS481
- DYS390

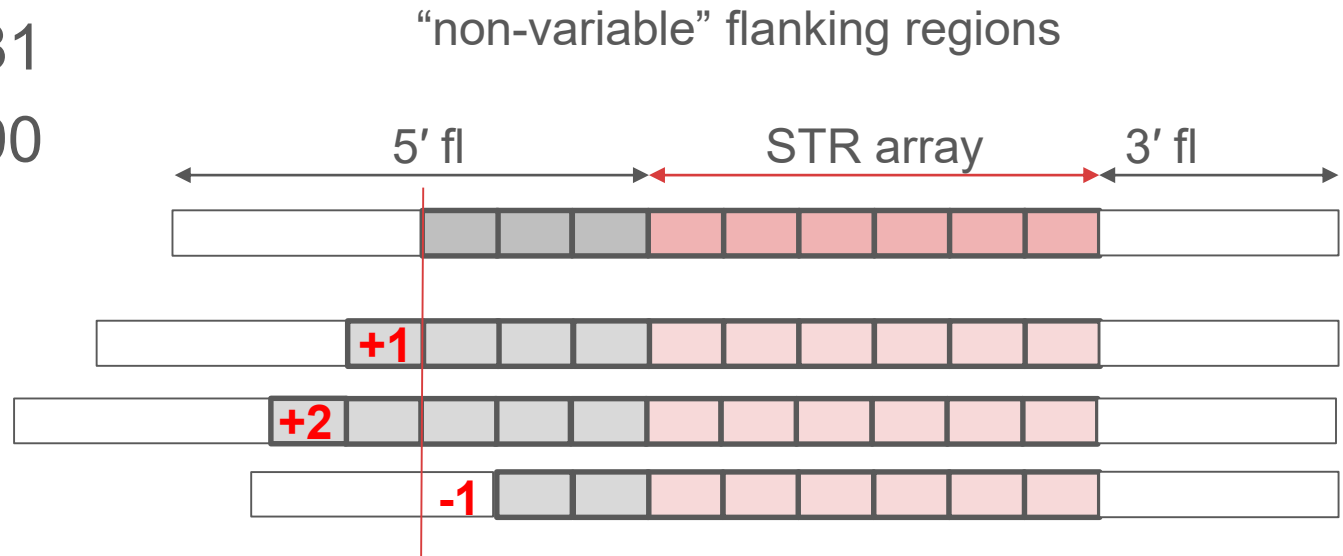

Huszar et al. FSI: Genetics (2018), 35, 97-106

A phylogenetic framework facilitates Y-STR variant discovery and classification via massively parallel sequencing

# Phylogenetic framework - DYS385a,b

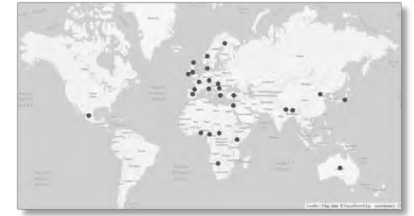

conventionally : (STRBase, [strbase.nist.gov](http://strbase.nist.gov))

DYS385a,b:  $[GAAA]_n$

2016 ISFG recommendation: (Parson et al. 2016 FSI Gen)

DYS385a :  $[TTTC]_n$

DYS385b:  $[GAAA]_n$

no distinction between a/b in kits – suggestion:

DYS385a,b:  $[GAAA]_n$

---

Huszar et al. FSI: Genetics (2018), 35, 97-106

A phylogenetic framework facilitates Y-STR variant discovery and classification via massively parallel sequencing



# Phylogenetic framework - DYS385a,b

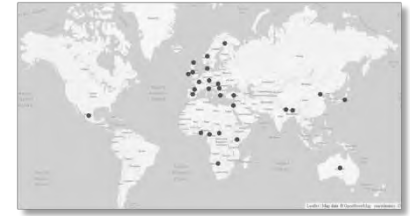

✓ Variable flanking regions:

recognise repeat structure, rather than calling several SNPs

| Allele    | Observed # | General structure of alleles including variable flanking sequences | CE allele name designation |
|-----------|------------|--------------------------------------------------------------------|----------------------------|
| canonical | 193        | <b>AAGG[6]</b> GAAA[n]                                             | n                          |
| variant   | 4          | <b>AAGG[5]</b> GAAA[n]                                             | n - 1                      |
| variant   | 2          | <b>AAGG[7]</b> GAAA[n]                                             | n + 1                      |
| variant   | 2          | <b>AAGG[8]</b> GAAA[n]                                             | n + 2                      |
| variant   | *          | <b>AAGG[9]</b> GAAA[n]                                             | n + 3                      |

\* observed in Novroski et al. 2016, FSI Gen

Huszar et al. FSI: Genetics (2018), 35, 97-106

A phylogenetic framework facilitates Y-STR variant discovery and classification via massively parallel sequencing

# Phylogenetic framework

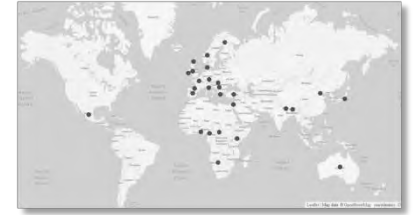

- ✓ high sequence variability – flexible software

**FDSTools** (Hoogenboom et al. 2017, FSI Gen)

non-standard populations, new variants, non-human STRs

- ✓ Multiple software/analysis – against bioinformatic nulls

UAS / STRaitRazor / FDSTools /

/ commercial software / in-house scripts

---

Huszar et al. FSI: Genetics (2018), 35, 97-106

A phylogenetic framework facilitates Y-STR variant discovery and classification via massively parallel sequencing

# Existing databases

✓ STRSeq: (Gettings et al. 2017, FSI Gen)

GenBank records at NCBI - (unique Acc#)

BioProjects (**Auto**, Auto+, Y-, X-STRs)

“Project Data:

No public data is linked to this project. Any recently released data that cites this project will be linked to it within a few days.”

✓ STRidER: (Bodner et al. 2016, FSI Gen)

STR sequence guide v4 (Phillips et al. 2018, FSI Gen)

user interface, pathway for submission, QC

# Existing databases

✓ STRSeq: (**Auto**, Auto+, Y-, X-STRs)

search by BLASTn  
detailed, comparable,  
sequence identifiers

✓ STRidER:

compendium for variation

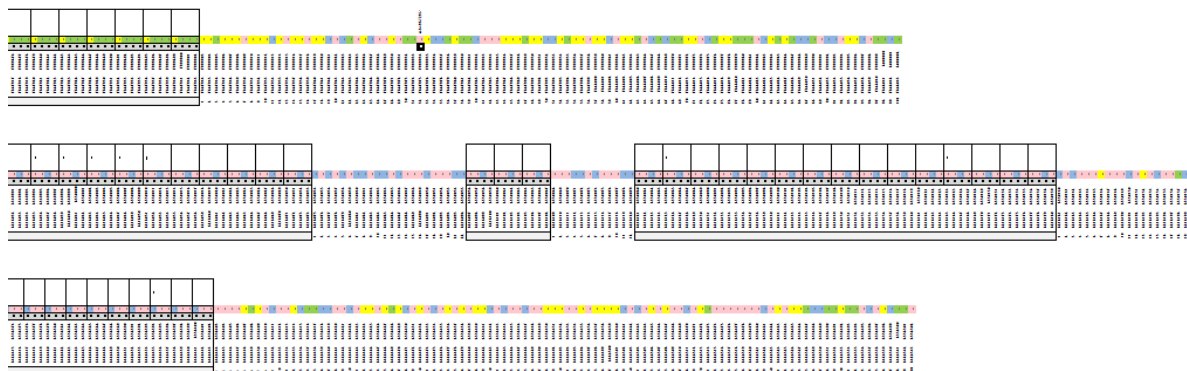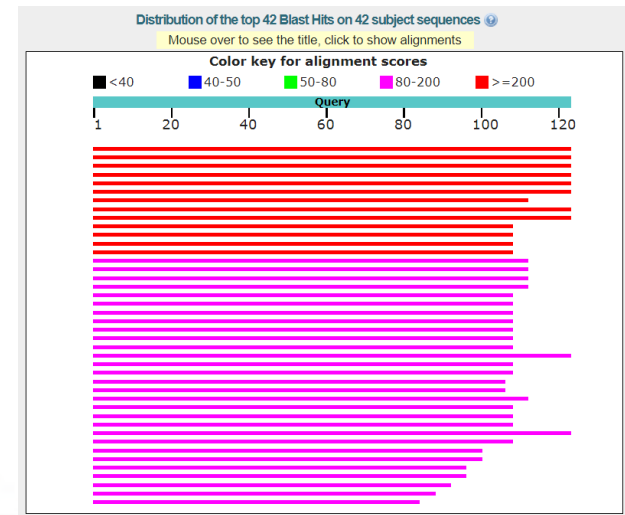

Sequences producing significant alignments:

Select: All None Selected: 0

Alignments Download Compare Clustal DistanceMatrix All results

| Description                                                                                         | Max Score | Total Score | Query Cover | E value | Per. Ident | Accession  |
|-----------------------------------------------------------------------------------------------------|-----------|-------------|-------------|---------|------------|------------|
| <input type="checkbox"/> Homo sapiens microsatellite D1S1856.13 (TCTA)13 sequence                   | 228       | 228         | 100%        | 4e-56   | 100.00%    | MH174842.1 |
| <input type="checkbox"/> Homo sapiens microsatellite D1S1856.13 TCTA GCTA (TCTA)11 sequence         | 222       | 222         | 100%        | 2e-54   | 99.19%     | MH174841.1 |
| <input type="checkbox"/> Homo sapiens microsatellite D1S1856.13 CCTA (TCTA)12 sequence              | 222       | 222         | 100%        | 2e-54   | 99.19%     | MH174840.1 |
| <input type="checkbox"/> Homo sapiens microsatellite D1S1856.14 (TCTA)14 sequence                   | 209       | 209         | 100%        | 1e-50   | 96.85%     | MH174845.1 |
| <input type="checkbox"/> Homo sapiens microsatellite D1S1856.14 CCTA (TCTA)13 sequence              | 209       | 209         | 100%        | 1e-50   | 96.85%     | MH174844.1 |
| <input type="checkbox"/> Homo sapiens microsatellite D1S1856.14 CCTA (TCTA)13 rs1019813099 sequence | 204       | 204         | 100%        | 6e-49   | 96.06%     | MH174843.1 |



# Existing databases - Issues

✓ STRSeq: not yet applicable for Auto+, Y-, X-STRs

instead: literature search  
 redundant task  
 no unique sequence ID  
 LeiceSTRSeq – local DB

| Y-STR     | sequence                                  | mutant count | variant type (SNP, indel, STR) | artibeans.in.gov | Zhao et al. 2015 reports all alleles | Wron et al. 2016 reports all alleles | Wendt et al. 2016 reports all alleles | Jure et al. 2017 reports all alleles | Novroski et al. 2017 reports all alleles | Waghaizer et al. 2015 reports novels | Churhill et al. 2016 reports novels only | Wendt et al. 2017 reports novels only | Forster et al. 1998 specific | Reid et al. 2002 specific | D'Amano et al. 2010 specific | Lee et al. 2016 specific | novel? |  |
|-----------|-------------------------------------------|--------------|--------------------------------|------------------|--------------------------------------|--------------------------------------|---------------------------------------|--------------------------------------|------------------------------------------|--------------------------------------|------------------------------------------|---------------------------------------|------------------------------|---------------------------|------------------------------|--------------------------|--------|--|
|           | <b>CE12-17_TCTA[9-14]CCTA[0-1]TCTA[3]</b> |              |                                |                  |                                      |                                      |                                       |                                      |                                          |                                      |                                          |                                       |                              |                           |                              |                          |        |  |
| DYS19     | CE12_TCTA[13]                             | 1            | ISNP                           | -                | -                                    | -                                    | -                                     | -                                    | -                                        |                                      |                                          |                                       | NA                           | NA                        | NA                           | NA                       | novel  |  |
|           | CE12_TCTA[9]CCTA[1]TCTA[3]                | 2            |                                | +                | -                                    | -                                    | -                                     | -                                    | -                                        |                                      |                                          |                                       | NA                           | NA                        | NA                           | NA                       | -      |  |
|           | CE13_TCTA[10]CCTA[1]TCTA[3]               | 11           |                                | +                | +                                    | -                                    | -                                     | -                                    | -                                        |                                      |                                          |                                       | NA                           | NA                        | NA                           | NA                       | -      |  |
|           | CE14_TCTA[11]CCTA[1]TCTA[3]               | 32           |                                | +                | +                                    | +                                    | -                                     | -                                    | -                                        |                                      |                                          |                                       | NA                           | NA                        | NA                           | NA                       | -      |  |
|           | CE15_TCTA[12]CCTA[1]TCTA[3]               | 36           |                                | +                | +                                    | +                                    | +                                     | -                                    | -                                        |                                      |                                          |                                       | NA                           | NA                        | NA                           | NA                       | -      |  |
|           | CE16_TCTA[13]CCTA[1]TCTA[3]               | 15           |                                | +                | +                                    | +                                    | +                                     | +                                    | -                                        |                                      |                                          |                                       | NA                           | NA                        | NA                           | NA                       | -      |  |
|           | CE17_TCTA[14]CCTA[1]TCTA[3]               | 4            |                                | +                | +                                    | +                                    | +                                     | +                                    | +                                        |                                      |                                          |                                       | NA                           | NA                        | NA                           | NA                       | -      |  |
|           | <b>CE9-22_AAGG[5-8]GAAA[9-22]</b>         |              |                                |                  |                                      |                                      |                                       |                                      |                                          |                                      |                                          |                                       |                              |                           |                              |                          |        |  |
| DYS385a,b | CE9_AAGG[5]GAAA[10]                       | 1            |                                | -                | NA                                   | -                                    | -                                     | -                                    | -                                        |                                      |                                          |                                       | NA                           | NA                        | NA                           | NA                       | novel  |  |
|           | CE9_AAGG[6]GAAA[9]                        | 3            |                                | +                | NA                                   | -                                    | -                                     | -                                    | -                                        |                                      |                                          |                                       | NA                           | NA                        | NA                           | NA                       | -      |  |
|           | CE10_AAGG[6]GAAA[10]                      | 7            |                                | +                | NA                                   | -                                    | -                                     | -                                    | -                                        |                                      |                                          |                                       | NA                           | NA                        | NA                           | NA                       | -      |  |
|           | CE11_AAGG[6]GAAA[11]                      | 18           |                                | +                | NA                                   | +                                    | -                                     | -                                    | -                                        |                                      |                                          |                                       | NA                           | NA                        | NA                           | NA                       | -      |  |
|           | CE12_AAGG[6]GAAA[12]                      | 17           |                                | +                | NA                                   | +                                    | +                                     | -                                    | -                                        |                                      |                                          |                                       | NA                           | NA                        | NA                           | NA                       | -      |  |
|           | CE13_AAGG[5]GAAA[14]                      | 1            |                                | -                | NA                                   | -                                    | -                                     | -                                    | -                                        |                                      |                                          |                                       | NA                           | NA                        | NA                           | NA                       | novel  |  |
|           | CE13_AAGG[6]GAAA[13]                      | 28           |                                | +                | NA                                   | +                                    | +                                     | -                                    | -                                        |                                      |                                          |                                       | NA                           | NA                        | NA                           | NA                       | -      |  |
|           | CE14_AAGG[6]GAAA[14]                      | 38           |                                | +                | NA                                   | +                                    | +                                     | +                                    | -                                        |                                      |                                          |                                       | NA                           | NA                        | NA                           | NA                       | -      |  |
|           | CE15_AAGG[5]GAAA[16]                      | 1            |                                | -                | NA                                   | -                                    | -                                     | -                                    | -                                        |                                      |                                          |                                       | NA                           | NA                        | NA                           | NA                       | novel  |  |
|           | CE15_AAGG[6]GAAA[15]                      | 20           |                                | +                | NA                                   | +                                    | +                                     | +                                    | -                                        |                                      |                                          |                                       | NA                           | NA                        | NA                           | NA                       | -      |  |
|           | CE15_AAGG[8]GAAA[13]                      | 1            |                                | -                | NA                                   | -                                    | -                                     | -                                    | -                                        |                                      |                                          |                                       | NA                           | NA                        | NA                           | NA                       | novel  |  |
|           | CE16_AAGG[6]GAAA[16]                      | 17           |                                | +                | NA                                   | +                                    | +                                     | +                                    | -                                        |                                      |                                          | +                                     | NA                           | NA                        | NA                           | NA                       | -      |  |
|           | CE16_AAGG[6]GAAA[2]TAAA[1]GAAA[13]        | 2            | ISNP                           | -                | NA                                   | -                                    | +                                     | +                                    | -                                        |                                      |                                          | +                                     | NA                           | NA                        | NA                           | NA                       | novel  |  |

✓ STRidER:

great QC for CE-based submission,  
 but no MPS submission pathway yet

# Existing databases – Potential issues

✓ STRSeq: GenBank Acc# - unique sequence ID

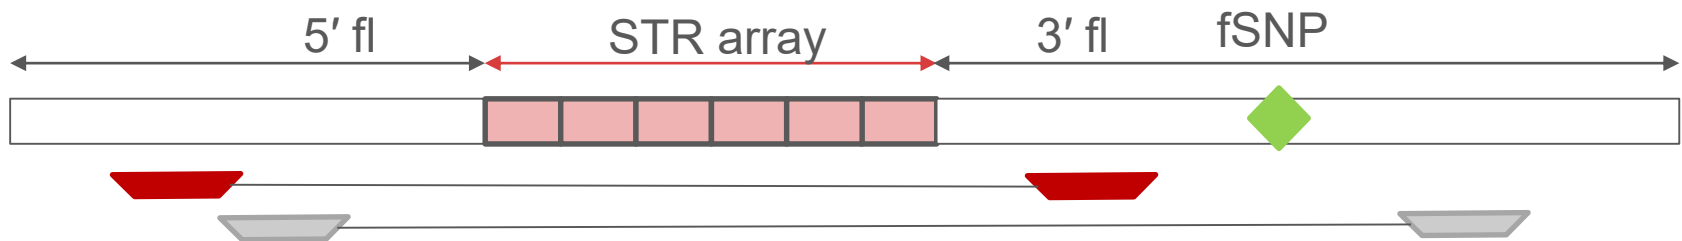

**Kit1** STR only – unique ID#1

Kit2 STR + **flanking SNP** – unique ID#2

D16S539 – same sample on GRCh38, chr16

PowerSeq:CE8\_GATA[8] – in STRSeq as MH167241.1

ForenSeq:CE8\_GATA[8]\_rs11642858 – in STRSeq as MK570017.1

# Existing databases – Potential issues

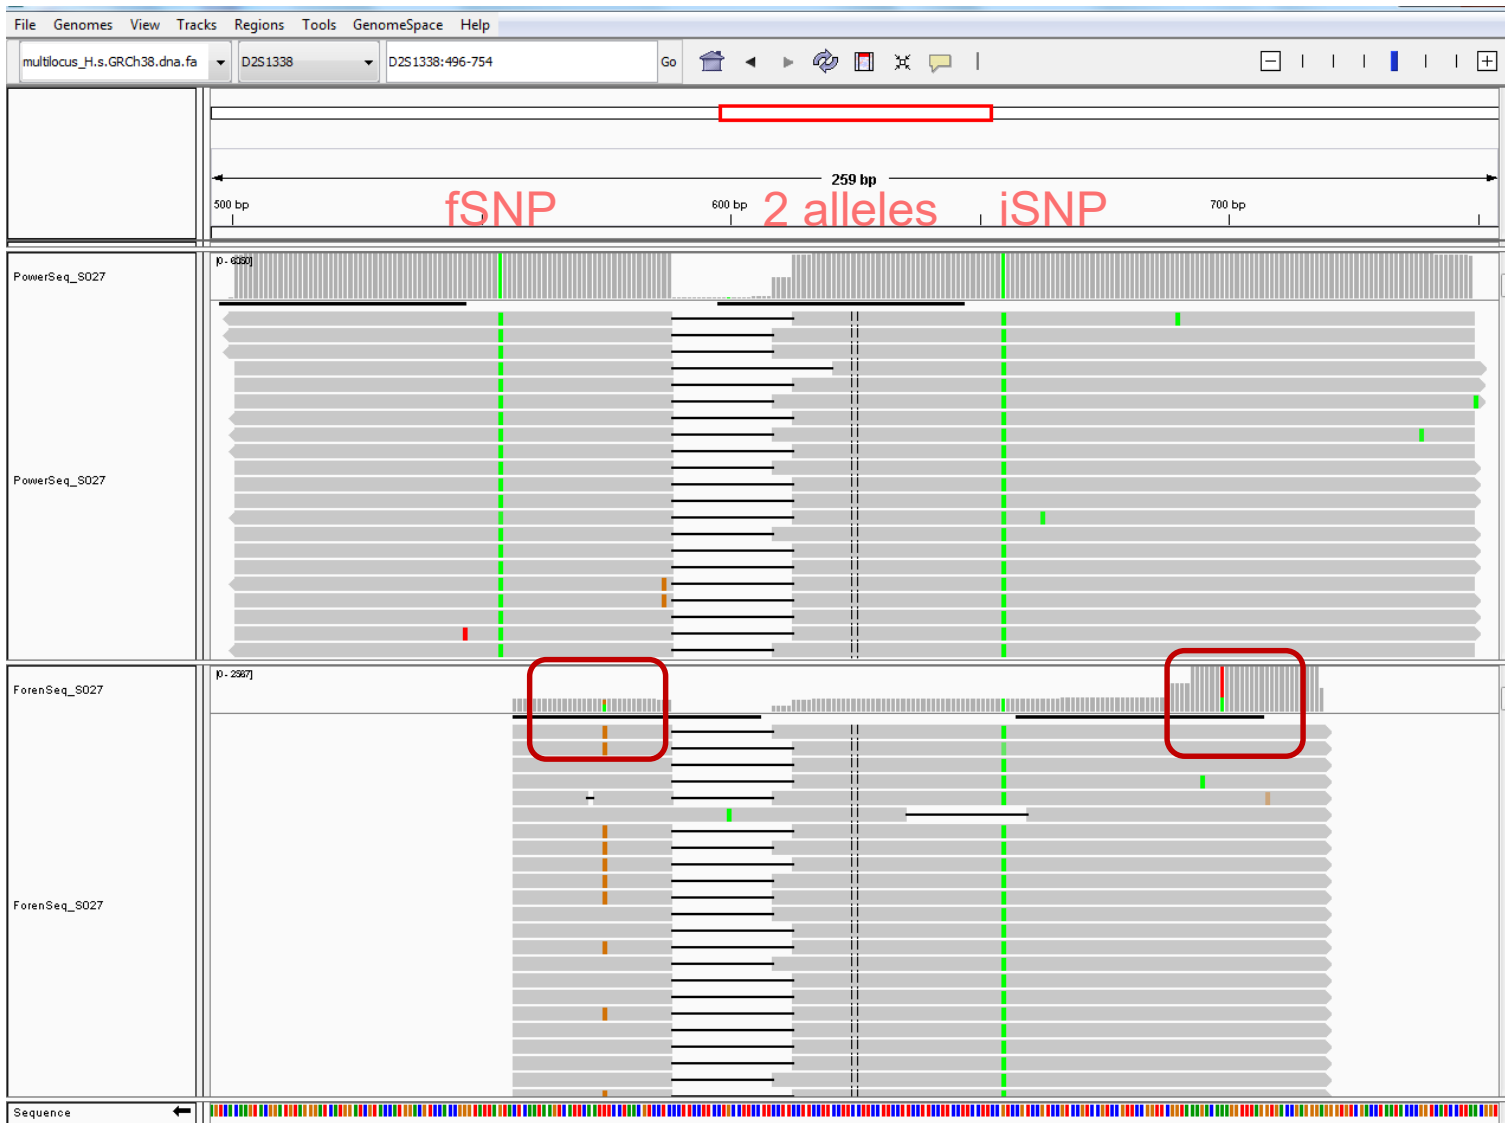

Primer interference – trimming!  
(Huszar et al. 2019, FSI Gen.)

# Existing databases – Potential issues

- ✓ STRSeq: GenBank Acc# - unique sequence ID
  - one DNA type – several unique sequence IDs
  - sequence ID groups – based on STR array seq identity
  - flanking region difference – exclusion / no match
    - real OR kit / software / reported region difference
  - unique ID currently at flanking region variants level
    - not ideal for automated matches



# Unique ID for comparable reporting

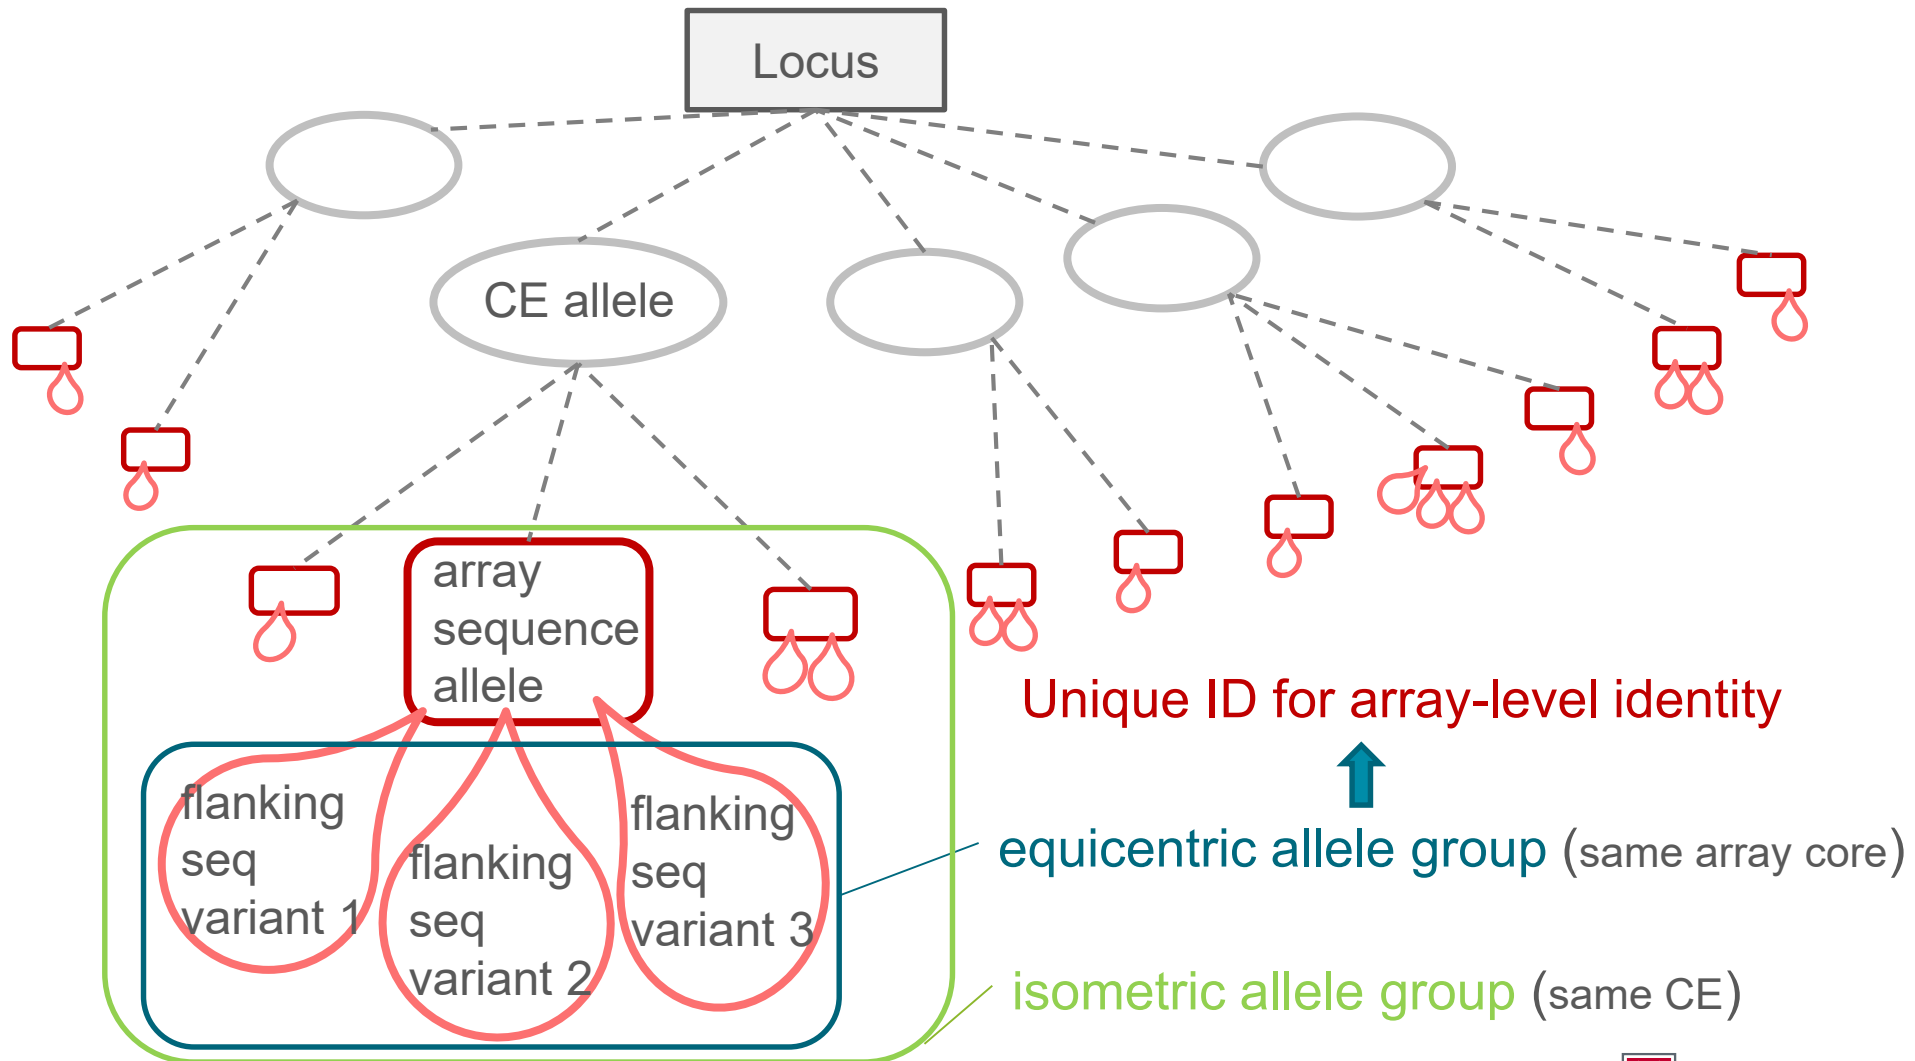

# Local database - LeiceSTRSeq

- ✓ To help MPS-based projects with redundant tasks:
  - literature search for allele variants
  - allele IDs from STRSeq – by array-level identity groups
  - extra: kit, software, amplified/reported coordinates
    - STRSeq ID/publications for reference, annotated string
- ✓ Difficulties:
  - lack of personnel: constant screening, input, cleaning data and development
  - Excel-based user's copy, Access-based background DB

# Summary

- ✓ more flexible/sensible array definition – repeat vs SNPs
- ✓ unique ID for STR array-level identity – comparable match
- ✓ flanking variants - with clear reporting coordinates  
(reference genome, kit type, software)
- ✓ Current state: doable, but not user-friendly
  - central QC
  - curation of submitted new alleles
  - build and maintain database
  - cross-platform searchable interface

# Acknowledgements

Mark Jobling

Jon Wetton

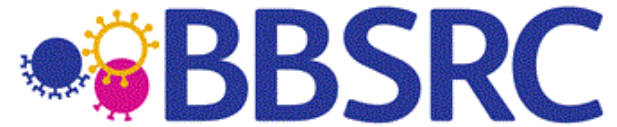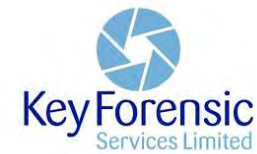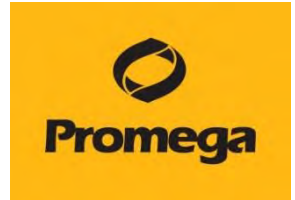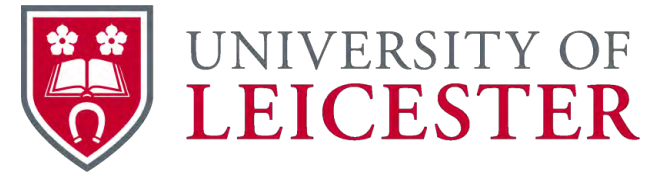

High Performance Computing cluster  
NUCLEUS Genomics Lab

## Other Leicester MPS projects:

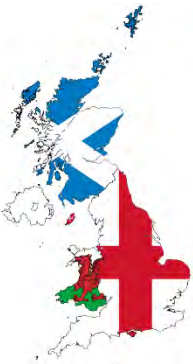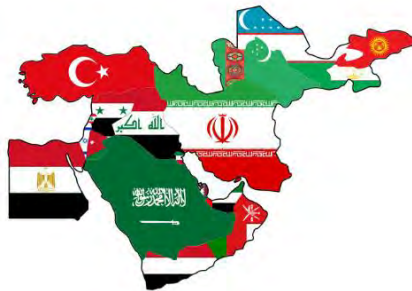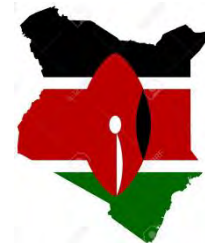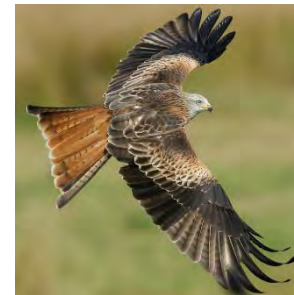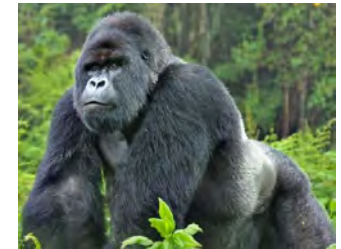

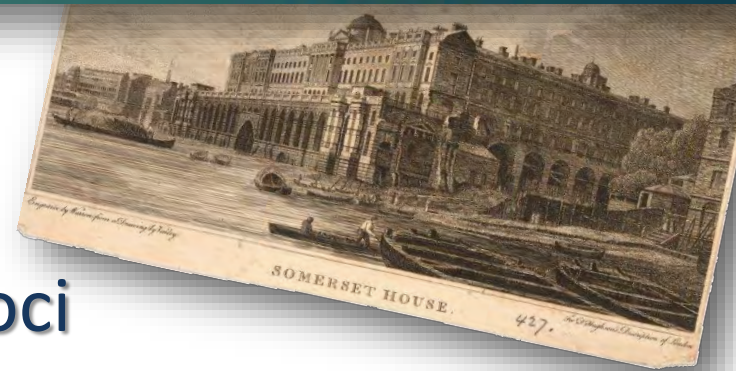

# CE-MPS Discordances

in a study of 31 autosomal STR loci  
from 498 Spanish individuals

Pedro A. Barrio<sup>1</sup>, Pablo Martin<sup>1</sup>, Antonio Alonso<sup>1</sup>, The DNASEQEX Consortium

<sup>1</sup> Servicio de Biología del Instituto Nacional de Toxicología y Ciencias Forenses (INTCF),  
Departamento de Madrid  
[pedro.barrio@justicia.es](mailto:pedro.barrio@justicia.es)

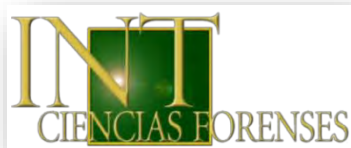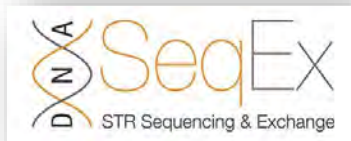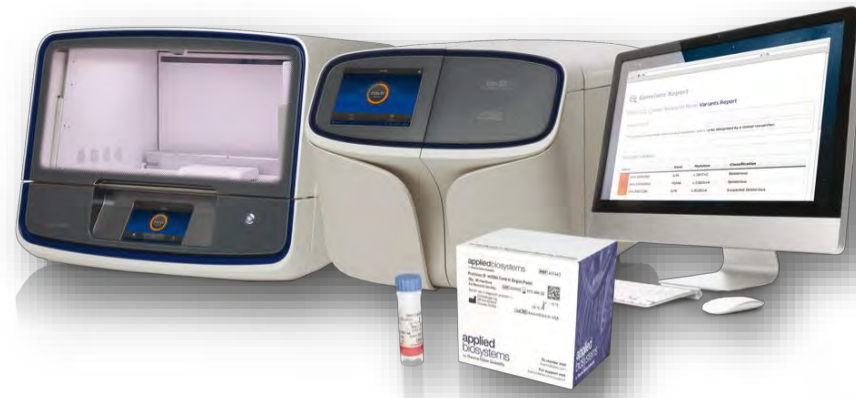



Comparison of two MPS platforms:  
Ion S5 (*Thermo Fisher Scientific*) MiSeq FGx™ (*Illumina*)

STRs Standardization typing by MPS

International Exchange of MPS data

Population Studies

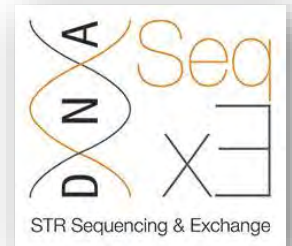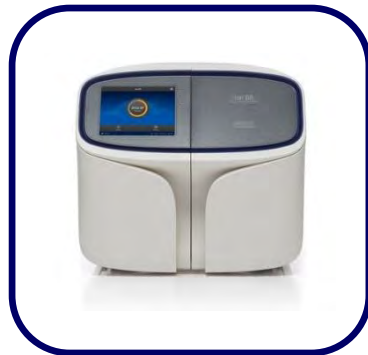

Madrid

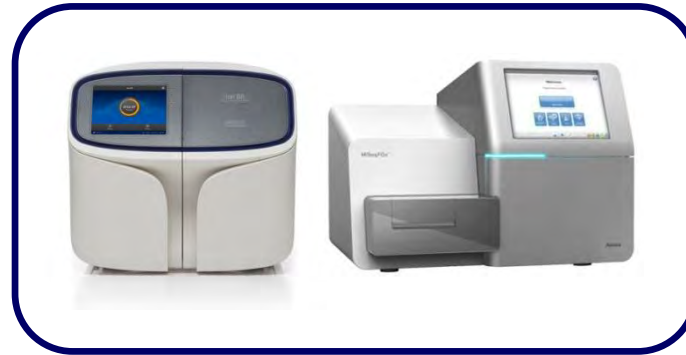

Innsbruck

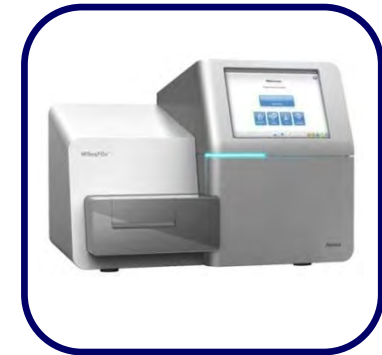

Berlin

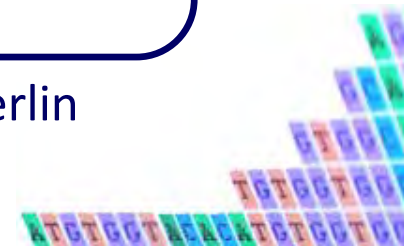

498 samples

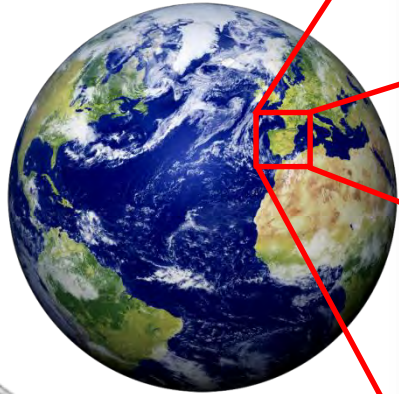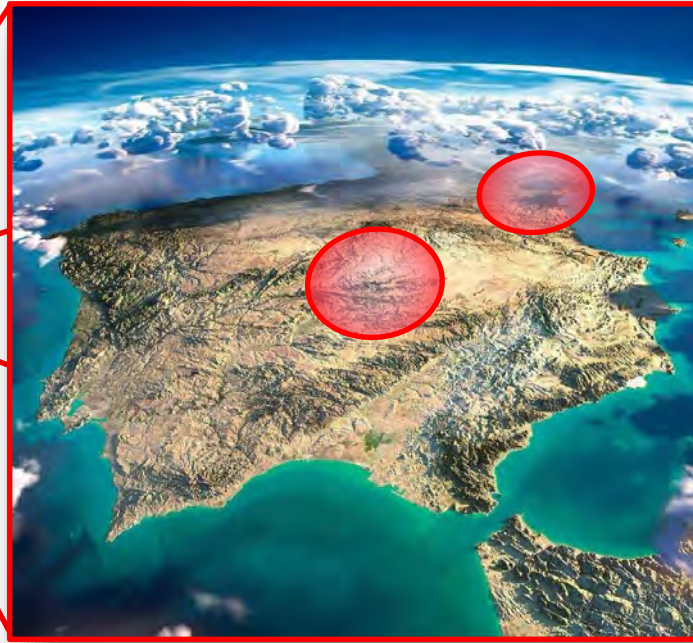

Spanish ancestries representing all the 17 Autonomous Communities of Spain (i.e. "regions")

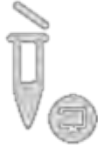

*Precision ID GlobalFiler® NGS STR Panel v2 on Ion S5 System*

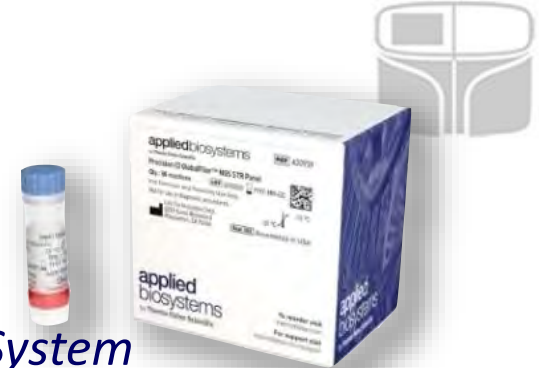

**Concordance Study CE/MPS**

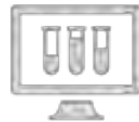

221 samples

PowerPlex Fusion 6C System (Promega, Madison, WI, USA)

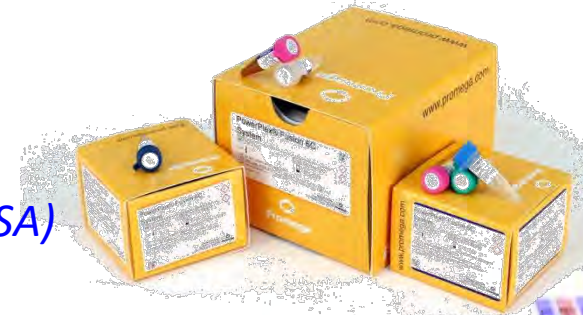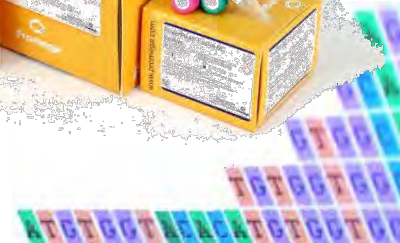

## STR allelic gains by sequence:

Number of alleles compared to heterozygosity observed for the 31 auSTR loci

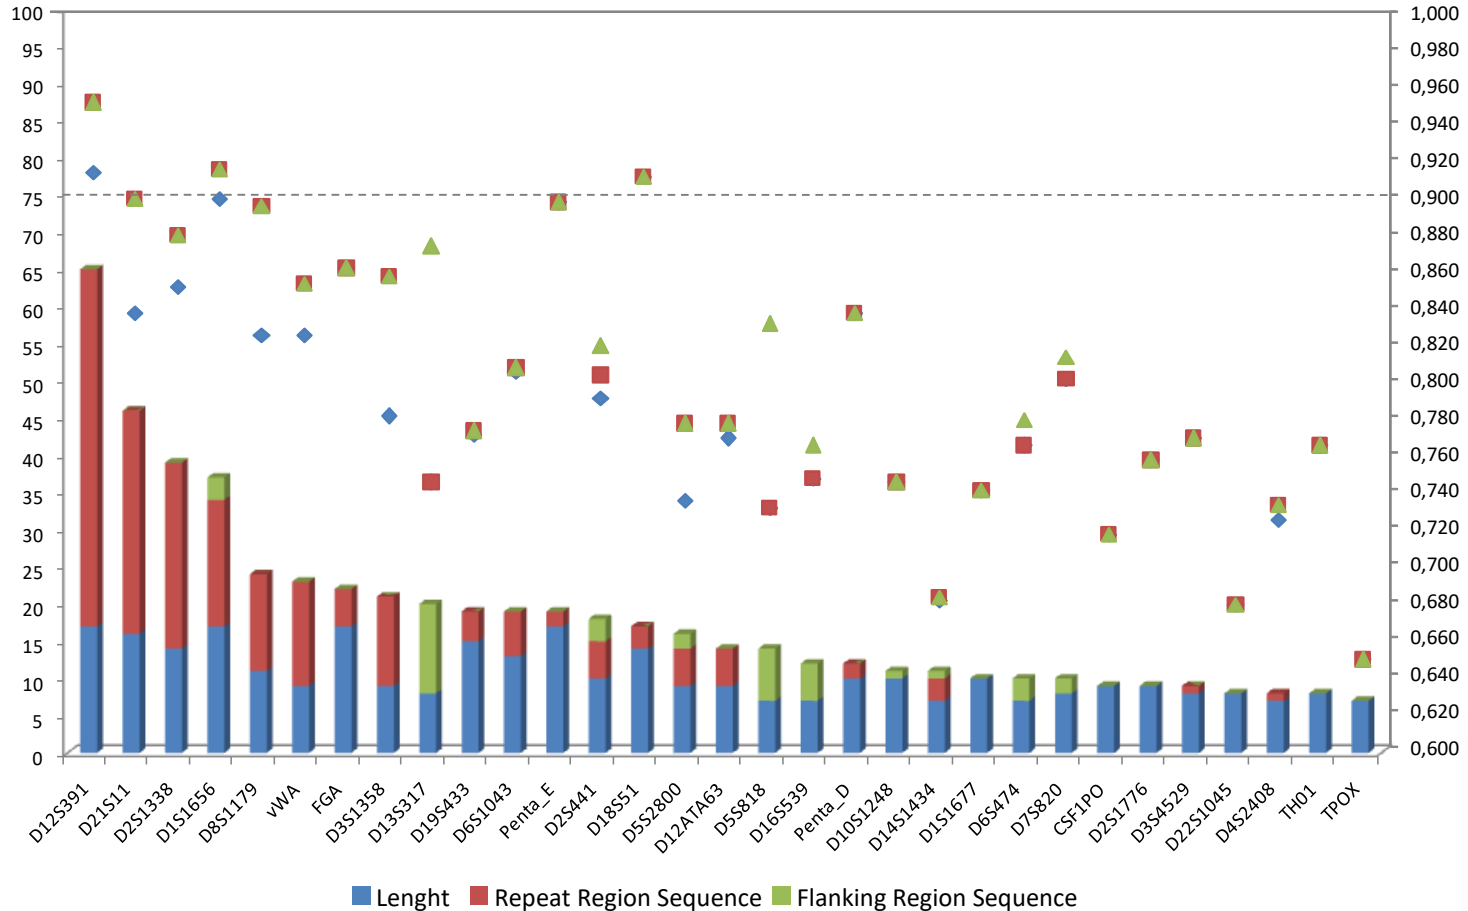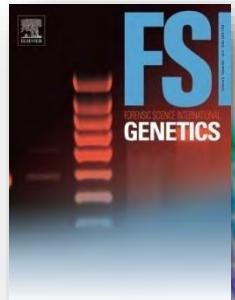



## Putative mismatches:

### 3 loci: Penta D, D2S441 and D19S433

| Penta D                     |                          | D2S441                      |                          | D19S433                     |                          |
|-----------------------------|--------------------------|-----------------------------|--------------------------|-----------------------------|--------------------------|
| Reference sequence          | Flanking SNP IUPAC codes | Reference sequence          | Flanking SNP IUPAC codes | Reference sequence          | Flanking SNP IUPAC codes |
| GRCh38 coordinates          | GRCh37 coordinates       | GRCh38 coordinates          | GRCh37 coordinates       | GRCh38 coordinates          | GRCh37 coordinates       |
| Distance from repeat region |                          | Distance from repeat region |                          | Distance from repeat region |                          |

5 samples: 5 samples out of 221 (97.73 % sample concordance)

1 locus/sample: 5 loci out of 5083 (99.90 % locus concordance)

1 allele/locus: 5 alleles out of 10166 (99.95 % allele concordance)

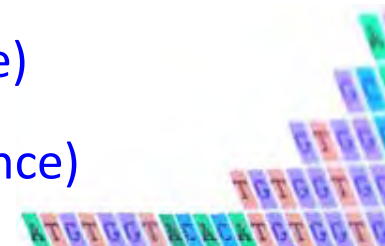

## 3 samples: M17-06600-47-869-EX-1, M17-06602-78-882-EX-1 and M17-06602-84-767-EX-1

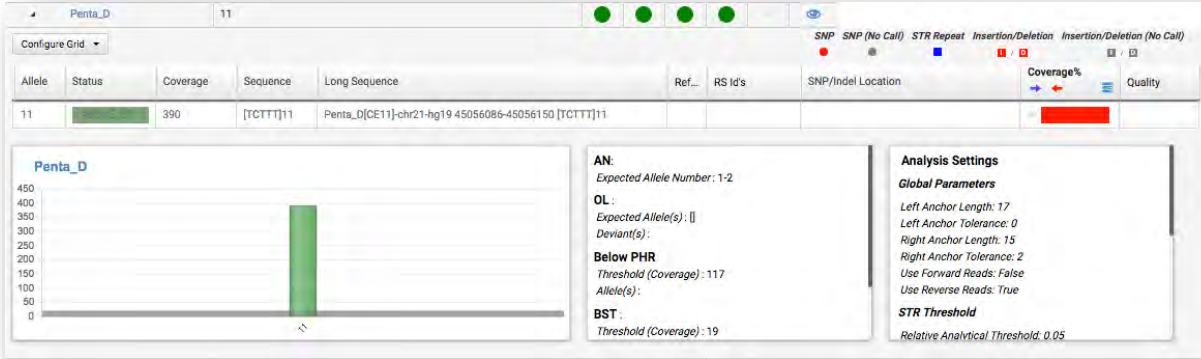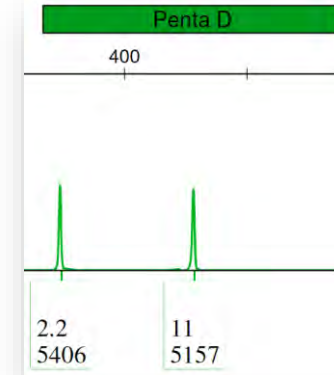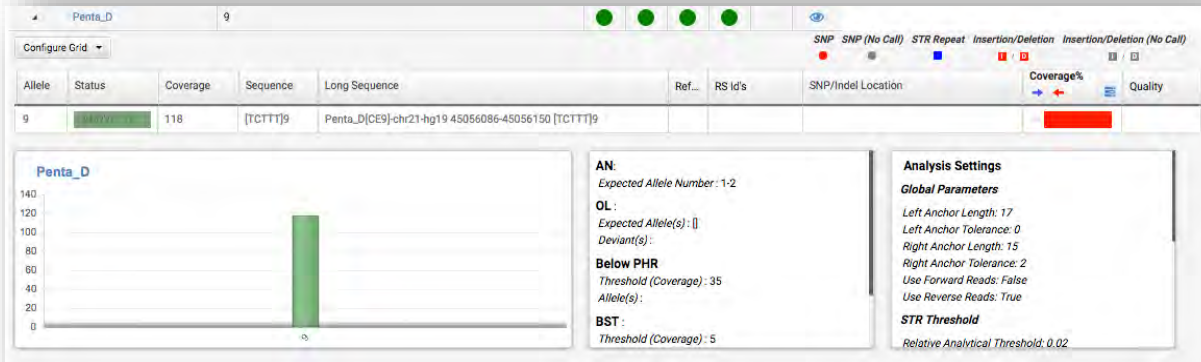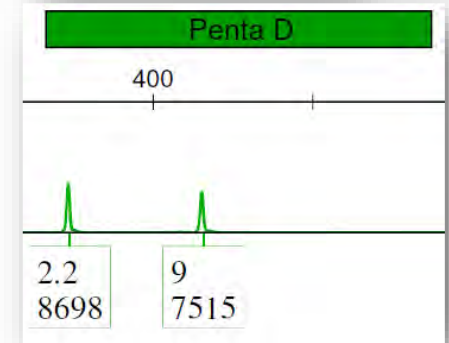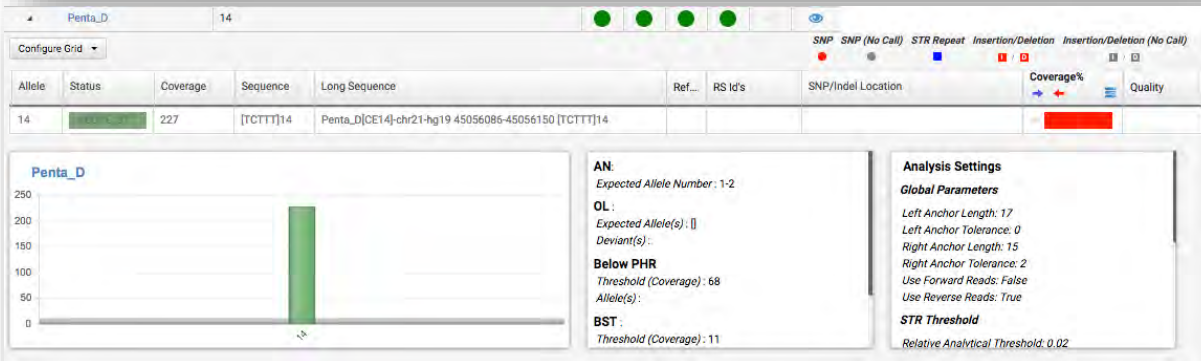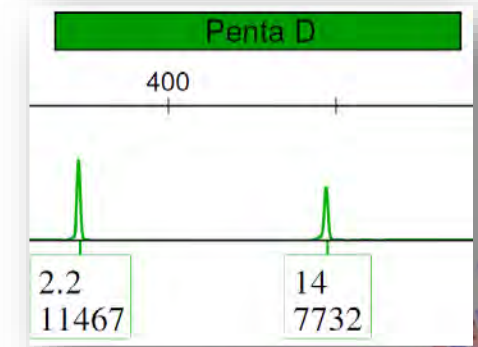



## Additional analysis: *STRait Razor v3* (Woerner et al., 2017)

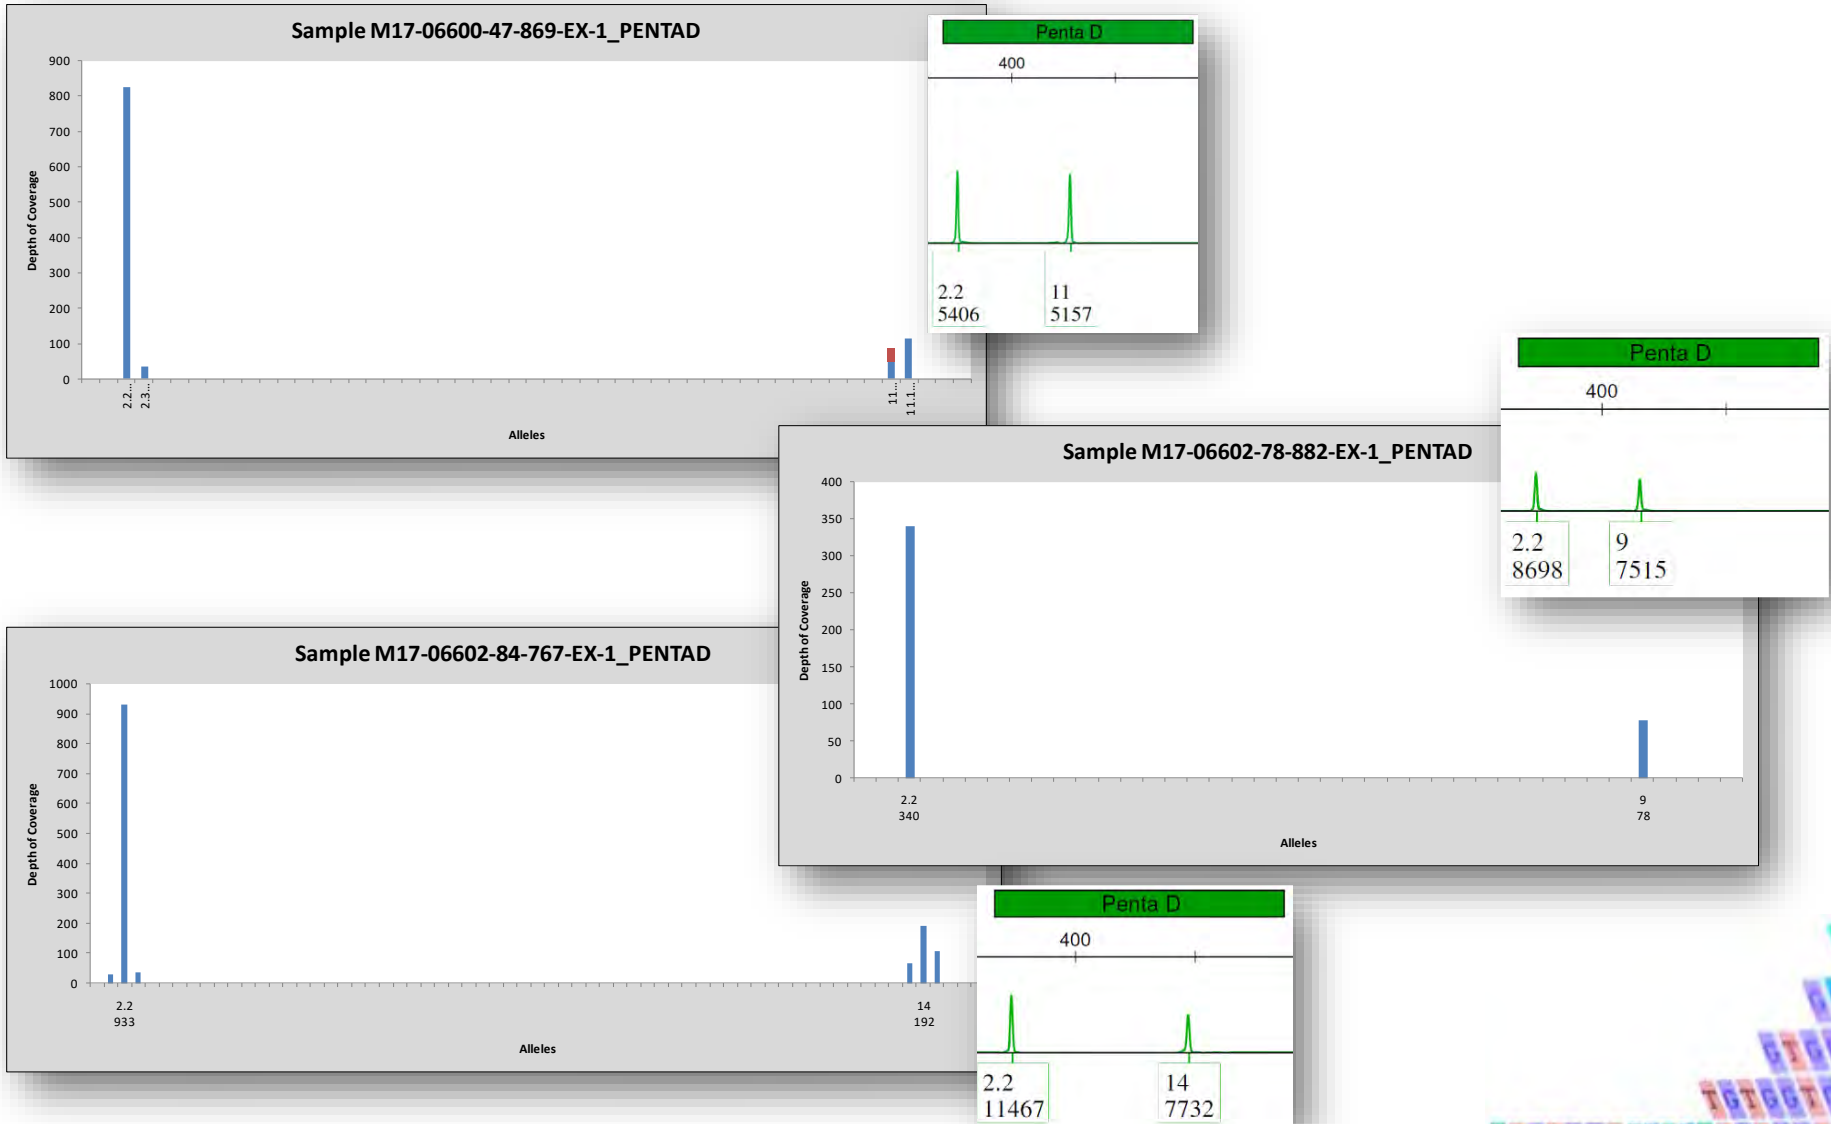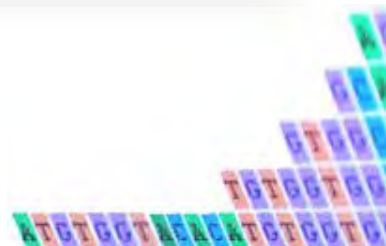





## 1 sample: M17-06603-60-608-EX-1

| Allel... | Status    | Coverag... | Sequence             | Long Sequence                                                 | Re... | RS Id's | SNP/Indel Location | Coverage% | Quality |
|----------|-----------|------------|----------------------|---------------------------------------------------------------|-------|---------|--------------------|-----------|---------|
| 12       | STUTTER   | 36         | [TCTA]9 TTTA[TCTA]2  | D2S441[CE12]-chr2-hg19 68239079-68239126 [TCTA]9 TTTA[TCTA]2  |       |         |                    |           |         |
| 13       | 90195.811 | 594        | [TCTA]10 TTTA[TCTA]2 | D2S441[CE13]-chr2-hg19 68239079-68239126 [TCTA]10 TTTA[TCTA]2 |       |         |                    |           |         |
| 14       | 90195.811 | 492        | [TCTA]11 TTTA[TCTA]2 | D2S441[CE14]-chr2-hg19 68239079-68239126 [TCTA]11 TTTA[TCTA]2 |       |         |                    |           |         |

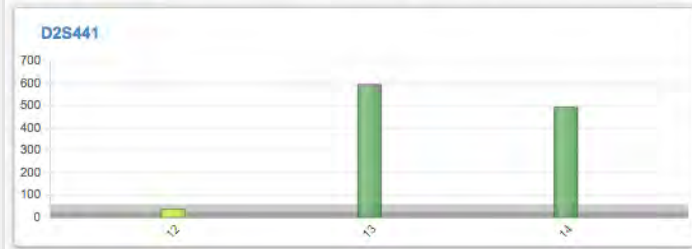

**AN:**  
Expected Allele Number: 1-2

**OL:**  
Expected Allele(s): [8, 9, 10, 11, 12, 13, 14, 15, 16, 17, 9.1, 11.3, 12.3, 13.3, 14.3]  
Deviant(s):

**Below PHR**  
Threshold (Coverage): 178  
Allele(s):

**BST:**

**Analysis Settings**

**Global Parameters**  
Left Anchor Length: 15  
Left Anchor Tolerance: 2  
Right Anchor Length: 15  
Right Anchor Tolerance: 2  
Use Forward Reads: True  
Use Reverse Reads: True

**STR Threshold**  
Relative Analytical Threshold: 0.02

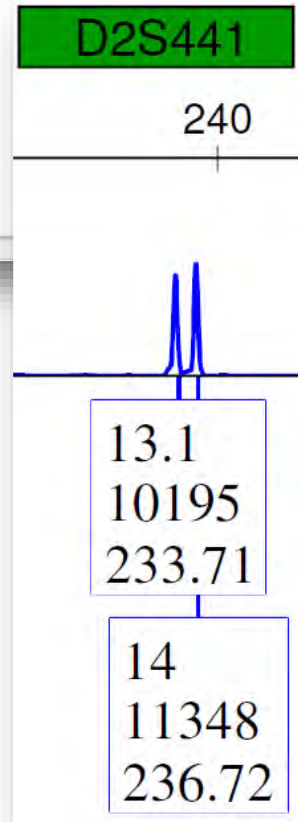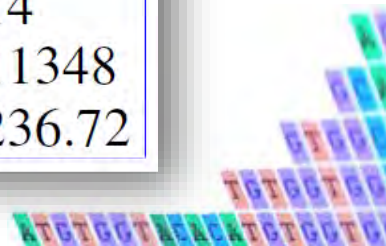





## Additional analysis: IGV v2.4.16 (Robinson et al., 2011; Thorvaldsdottir et al., 2013)

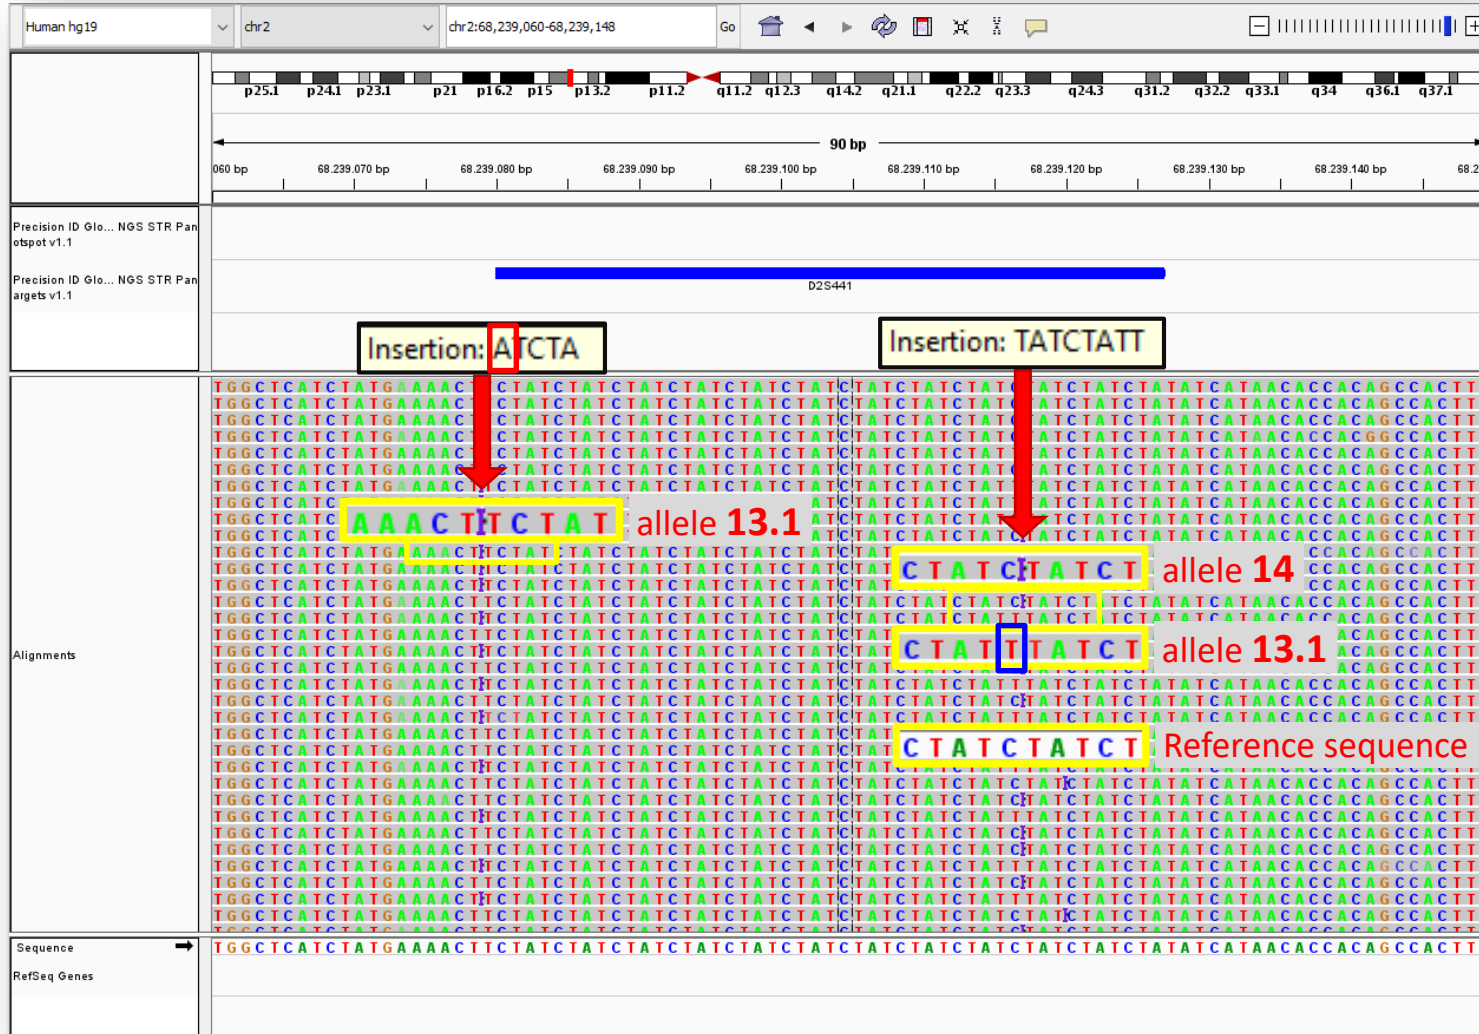

## 1 sample: M17-06600-36-824-EX-1

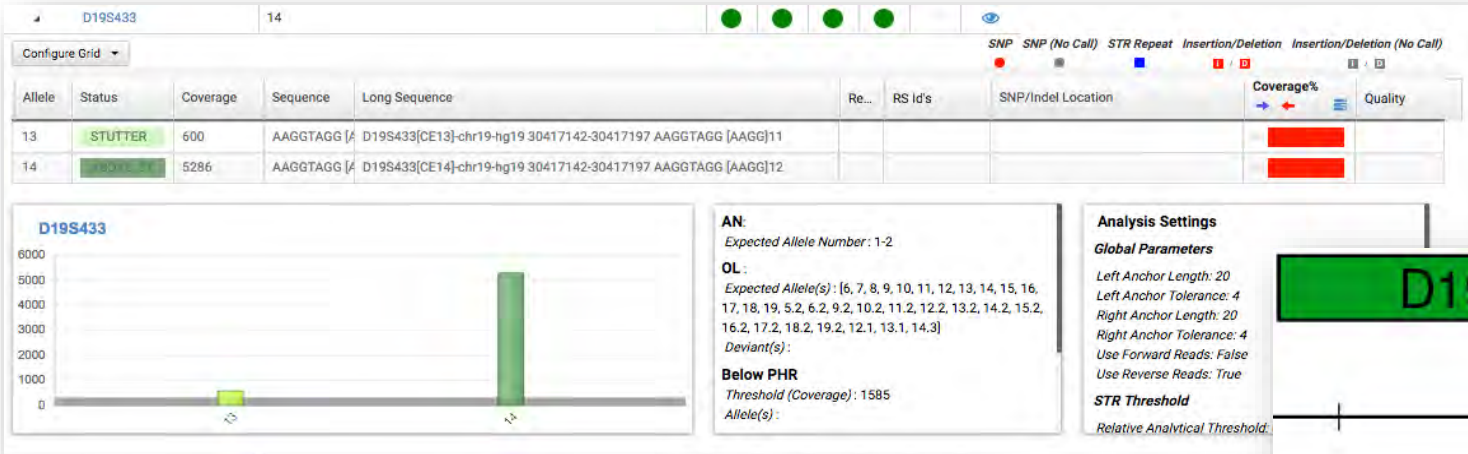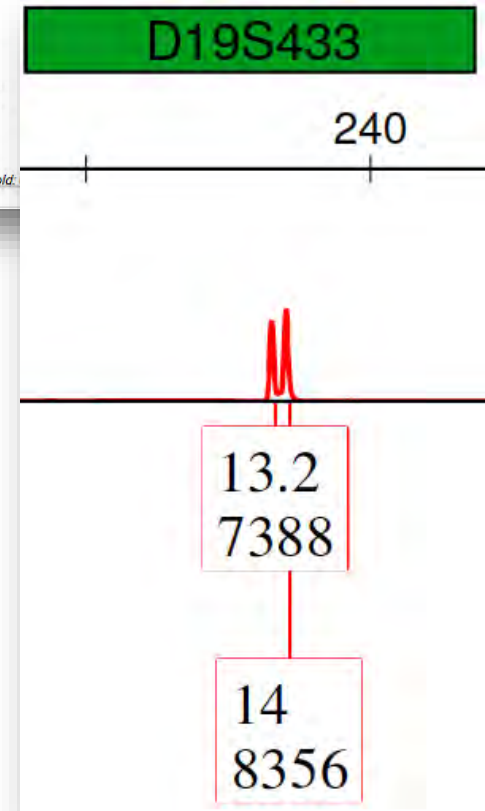

## Additional analysis: *STRait Razor v3* (Woerner et al., 2017)

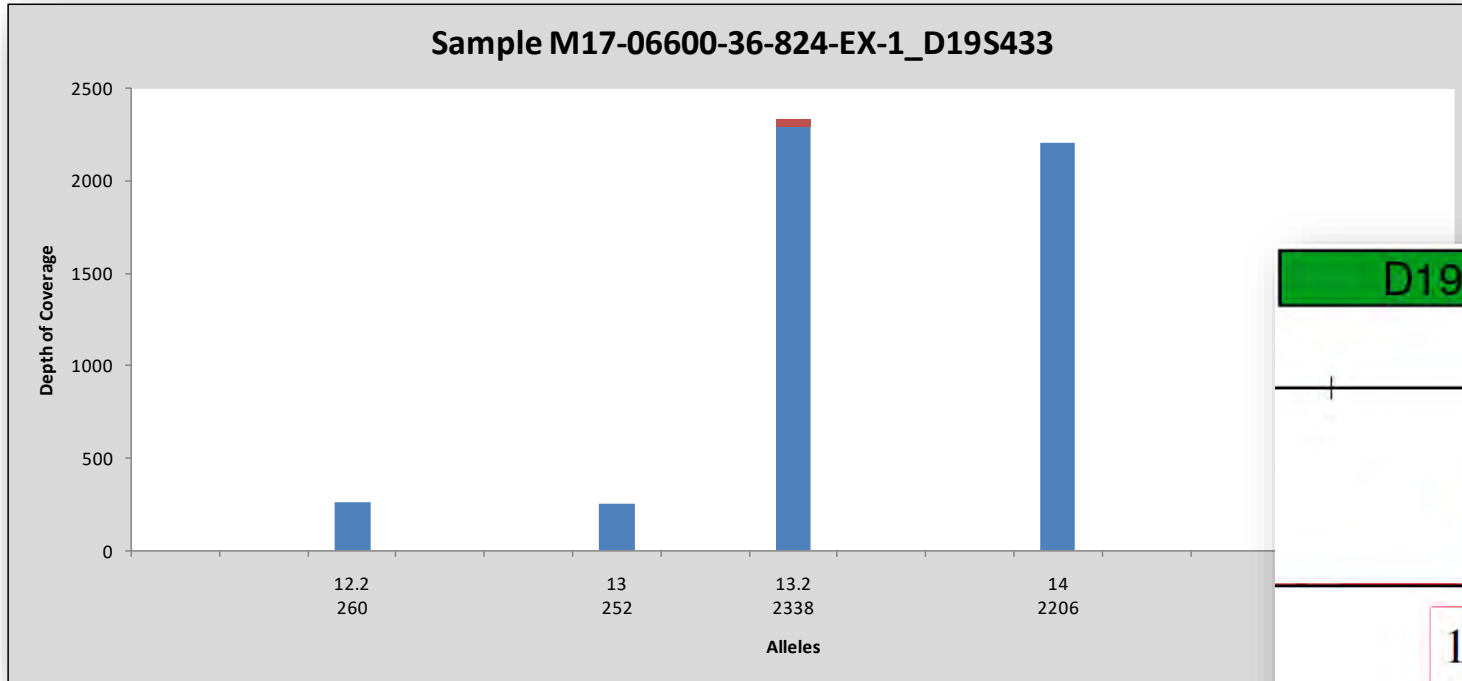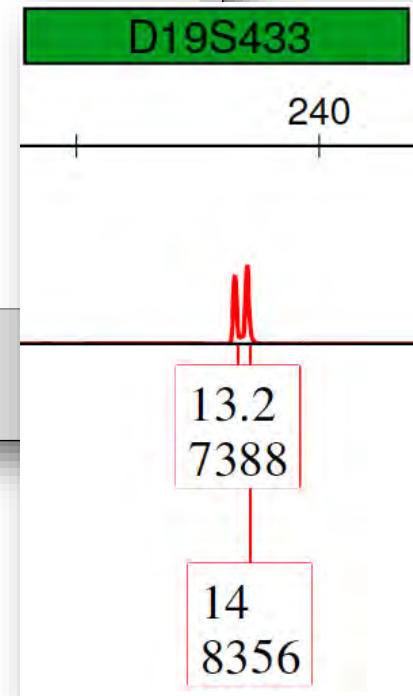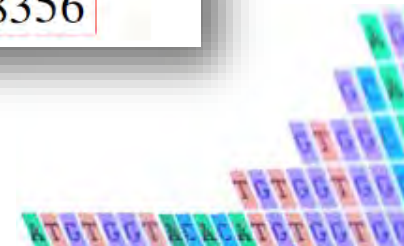

## Additional analysis: *STRSeq catalog* (Gettings et al., 2017)

BioProject: [PRJNA380574](https://www.ncbi.nlm.nih.gov/bioproject/PRJNA380574) D19S433[CE13.2]  [CCTT]12 ccta CCTT cttt CCTT rs745607776

Integrative Genomics Viewer - *IGV v2.4.16* (Robinson et al., 2011; Thorvaldsdottir et al., 2013)

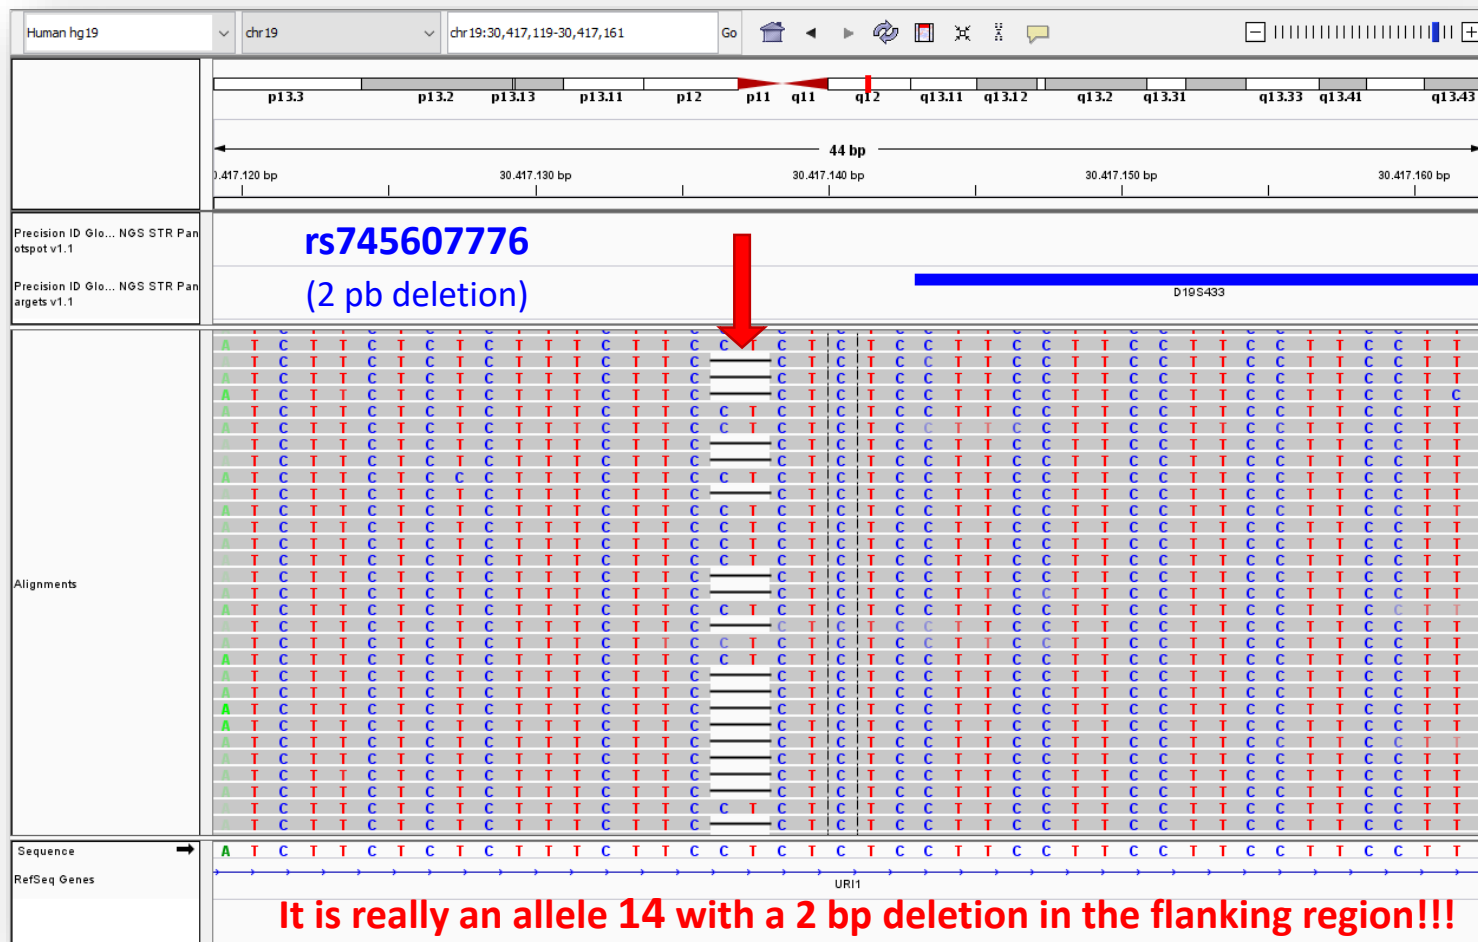





\* Findings based on the **CE** (*Fusion 6C*) - **MPS** (*Global NGS*) concordance study:

- Deletions in the flanking region (13 bp deletion in Penta D associated to CE allele 2.2) may cause “**bioinformatic null alleles**” if the selected region matches the anchor region of sequence recognition by the software.
- Deletions and insertions in the flanking regions also generated discrepancies between the **CE micro-variant alleles** and **MPS** data for Penta D, D2S441, and D19S433.

**Penta\_D[CE2.2]**-chr21-hg19 45056086-45056150 **[AAAGA]5** 45056081-45056093-**delAAAAGAAAGAAAA**

**D2S441[CE13.1]**-chr2-hg19 68239079-68239126 **A [TCTA]10 TTTA [TCTA]2**

**D19S433[CE13.2]**-chr19-hg19 30417142-30417197 **[CCTT]12** ccta **CCTT** cttt **CCTT** 30417137-3041713-**delGA**

- The knowledge of the MPS sequence demonstrated that **these microvariants were erroneously called by CE**, as they were alleles with complete repeat units plus insertions or deletions in the flanking region.
- The identification and classification of these small discrepancies in the different STR markers will allow software improvement and the development of **better comparison tools between CE and MPS data**.

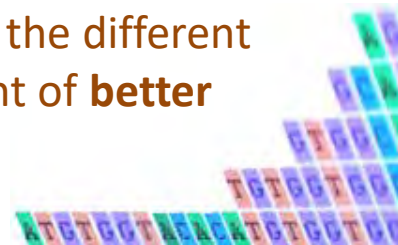

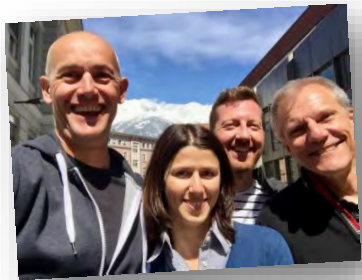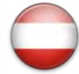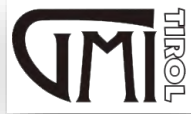

Institute of Legal Medicine, Medical University of Innsbruck. Austria

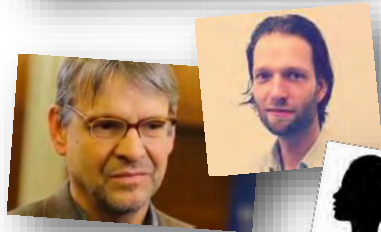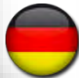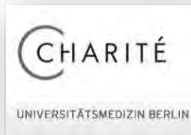

Institute of Legal Medicine and Forensic Science, Charité - Universitätsmedizin Berlin. Germany

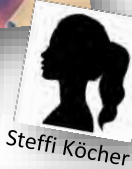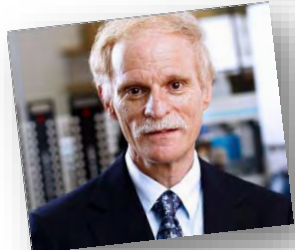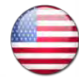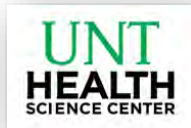

Center for Human Identification at the University of North Texas Health Science Center. USA

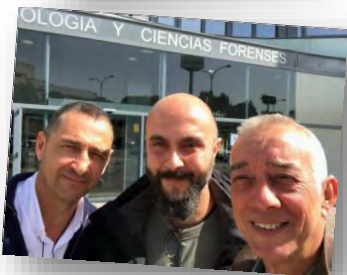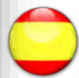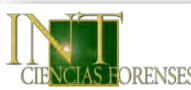

National Institute of Toxicology and Forensic Sciences. Madrid Department. Spain



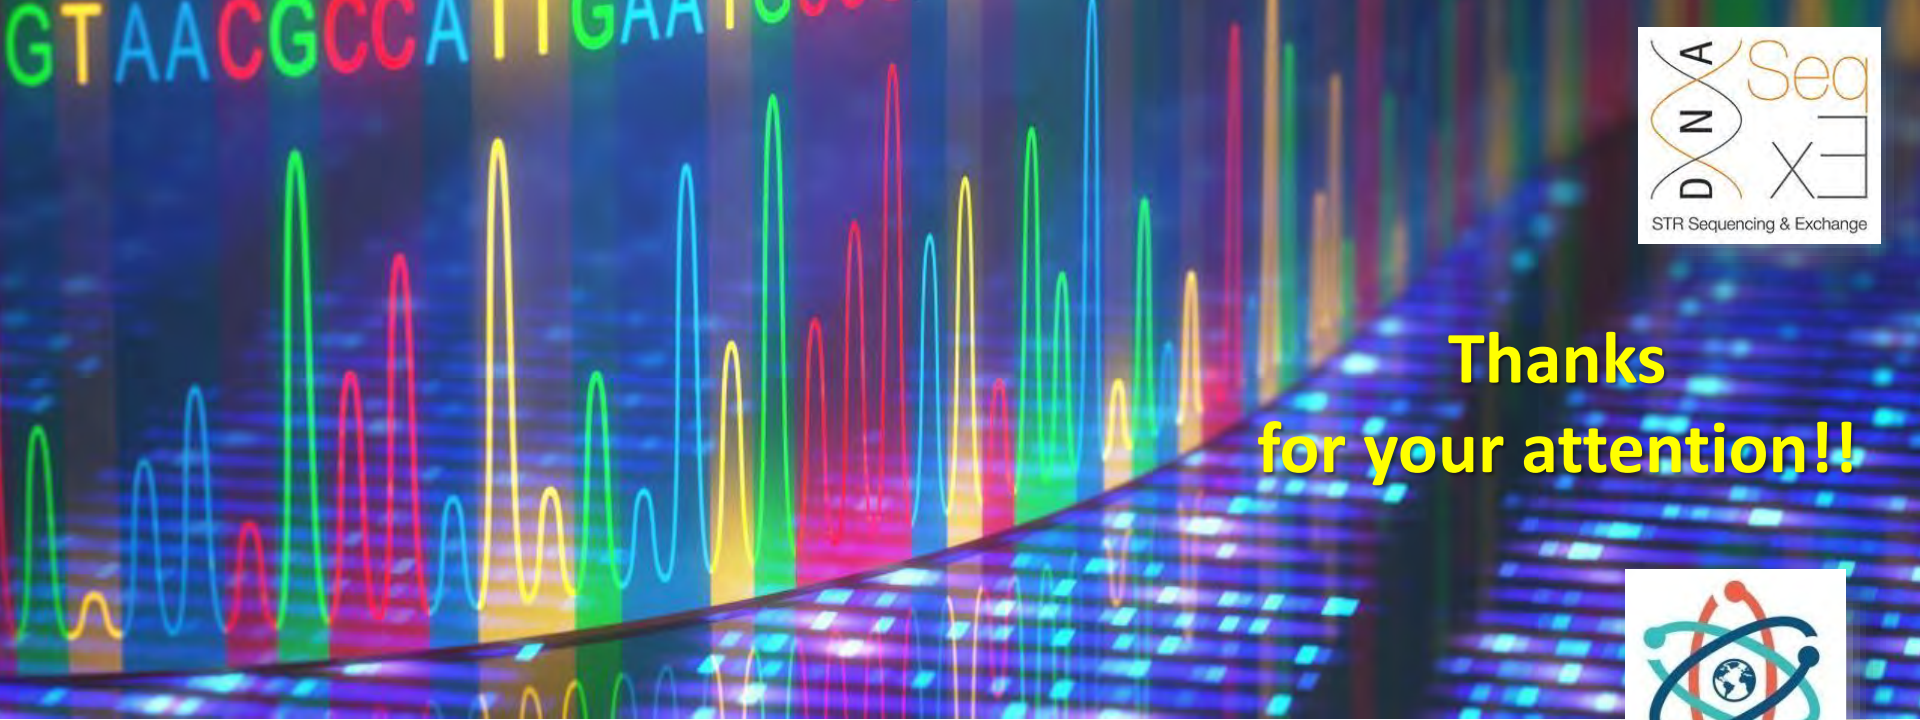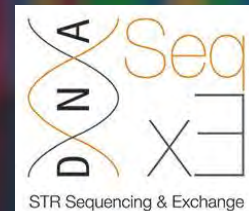

Thanks  
for your attention!!

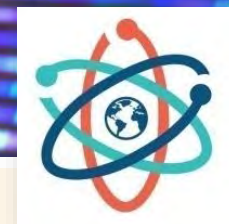

## Acknowledgements

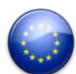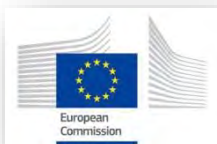

This project has been funded with support from the European Commission (grant **HOME/2014/ISFP/AG/LAWX/4000007135** under the Internal Security Funding Police programme of the European Commission---Directorate General Justice and Home Affairs). This publication reflects the views only of the authors, and the European Commission cannot be held responsible for any use which may be made of the information contained therein.

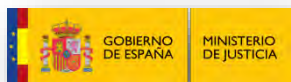

The authors would like to thank members of LIMS Administrators Team of the General Subdirectorate of New Technologies of Justice (SGNTJ) of the Ministry of Justice (Spain) for their helpful technical support.

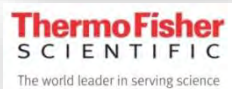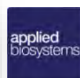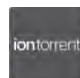

Thermo Fisher Scientific Inc. Provider of *Precision ID GlobalFiler® NGS STR Panel v2* and *Converge v2.1* software. The authors would like to thank Matt Phipps for technical support.

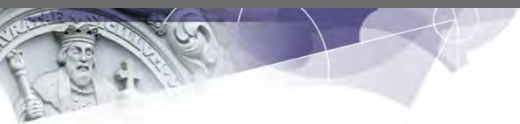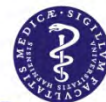

Faculty of Health and Medical Sciences

# STR sequencing in Copenhagen

**Claus Børsting MSc, PhD**  
Senior researcher

**Section of Forensic Genetics**  
**Department of Forensic Medicine**  
**Faculty of Health and Medical Sciences**  
**University of Copenhagen**  
**Denmark**

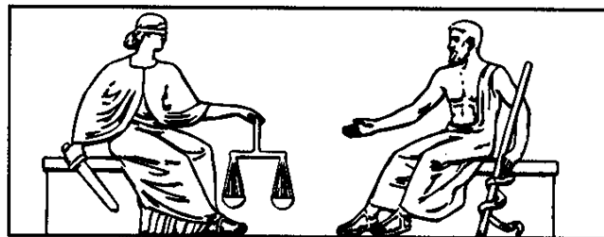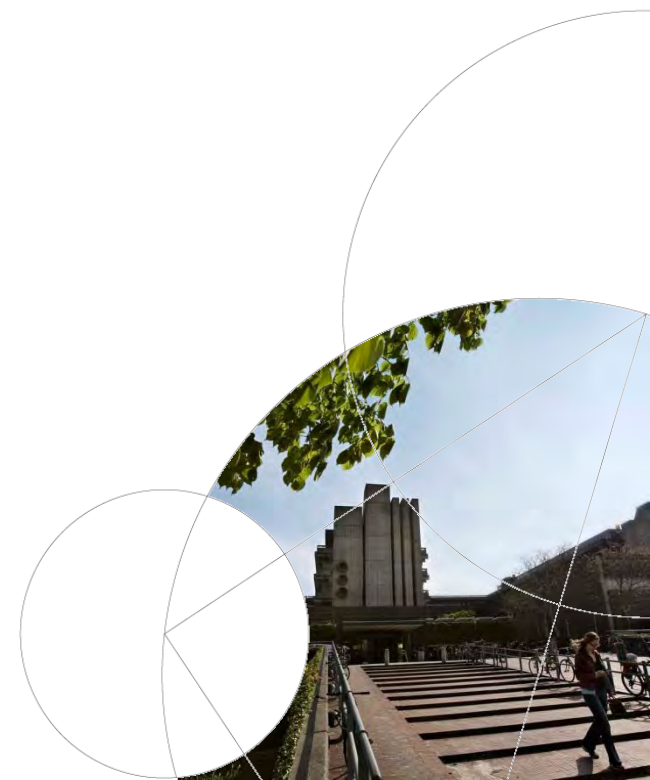



# STR sequencing in Copenhagen

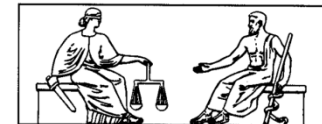

A bit of history

Case reporting

NGS nomenclature issues

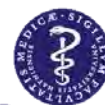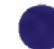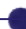

# STR sequencing in Copenhagen - history

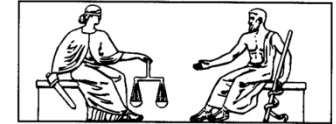

## 2011: 454 GS Junior (Roche)

Fordyce et al., (2011) *Biotechniques* 51, 127-133.  
Rockenbauer et al., (2014) *FSI genet.* 8, 68-72.  
Dalsgaard et al., (2014) *FSI genet.* 8, 195-199.  
Gelardi et al., (2014) *FSI genet.* 12, 38-41.

## 2014: Ion PGM (Thermo Fisher Scientific)

Fordyce et al., (2015) *FSI genet.* 14, 132-140.  
Friis et al., (2016) *FSI genet.* 21, 68-75.  
Vilsen et al., (2017) *FSI genet.* 28, 82-89.

## 2015: MiSeq FGx (Verogen)

Hussing et al., (2018) *Foren. Sci. Res.* 3, 111-123.  
Vilsen et al., (2018) *FSI genet.* 35, 107-112.  
Hussing et al., (2019) *Int. J. Legal Med.* 133, 325-334.  
Simayijiang et al., (2019) in preparation.  
DNASEQEX 29 Y-STR panel test (2019).

## 2016: Ion S5 System (Thermo Fisher Scientific)

Precision ID Globalfiler mixture ID test (2017).  
Project Iceberg: Precision ID Globalfiler NGS STR panel test (2018-19).

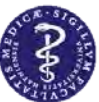

# STR sequencing in Copenhagen - history

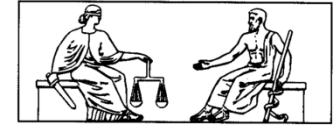

Nomenclature\*:

- Locus name (used in forensic genetics)
- Length of repeat region/length of subunit
- Sequence(s) of subrepeat(s) followed by the number of repeats
- Variation in the flanking regions

Examples:

TH01[9] AATG[9]

D5S818[12] AGAT[9]ACAT[1]AGAT[2]rs25768[T]rs73801920[G]

DXS10135[23] AAGA[3]GAAAGGA[1]AAGA[19]AAAG[1]del:9306454-6

Python script: STRinNGS<sup>‡</sup>

\*Gelardi *et al.*, FSI genet. (2014) 12, 38-41

‡ Friis *et al.*, (2016) FSI genet. 21, 68-75.

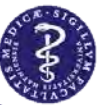

## Case reporting in Copenhagen - history



### Forensic Genetics in Denmark

- Accredited according to ISO 17025
- University based service
- Independent of the State administration, police, and judiciary system

### Report everything we detect

- Unless the quality of the results prevent it
- Example: LPL in the FFFL panel
- Example: rs7520386 and rs576261 in the Precision ID Identity Panel

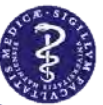

# STR sequencing nomenclature



Examples:

TH01[9] AATG[9]

D5S818[12] AGAT[9]ACAT[1]AGAT[2]rs25768[T]rs73801920[G]

DXS10135[23] AAGA[3]GAAAGGA[1]AAGA[19]AAAG[1]del:9306454-6

STRidER nomenclature\*:

TH01 [AATG]9

D5S818 [ATCT]9 ATGT [ATCT]2 rs25768[T] rs73801920[G]

DXS10135 [AAGA]3 gaaagga [AAGA]19 AAAG del:9306454-6

\*Bodner et al., (2016) FSI genet. 24, 97-102.

Phillips et al., (2018) FSI genet. 34, 162-169.





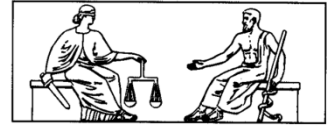

# STR sequencing nomenclature

| D13S317                     |                                                                                                                                                                                                                                                                                                                                                                                           |
|-----------------------------|-------------------------------------------------------------------------------------------------------------------------------------------------------------------------------------------------------------------------------------------------------------------------------------------------------------------------------------------------------------------------------------------|
| Reference sequence          | C C C A T C T A A C G A C C C T A T T G T A T T T A C A A A T A C A T                                                                                                                                                                                                                                                                                                                     |
| Flanking SNP IUPAC codes    | Y R                                                                                                                                                                                                                                                                                                                                                                                       |
| GRCh38 coordinates          | 82147991 82147992 82147993 82147994 82147995 82147996 82147997 82147998 82147999 82148000 82148001 82148002 82148003 82148004 82148005 82148006 82148007 82148008 82148009 82148010 82148011 82148012 82148013 82148014 82148015 82148016 82148017 82148018 82148019 82148020 82148021 82148022 82148023 82148024 82148025 82148026 82148027 82148028 82148029 82148030 82148031 82148032 |
| GRCh37 coordinates          | 82722126 82722127 82722128 82722129 82722130 82722131 82722132 82722133 82722134 82722135 82722136 82722137 82722138 82722139 82722140 82722141 82722142 82722143 82722144 82722145 82722146 82722147 82722148 82722149 82722150 82722151 82722152 82722153 82722154 82722155 82722156 82722157 82722158 82722159 82722160 82722161 82722162 82722163 82722164 82722165 82722166 82722167 |
| Distance from repeat region | 34 33 32 31 30 29 28 27 26 25 24 23 22 21 20 19 18 17 16 15 14 13 12 11 10 9 8 7 6 5 4 3 2 1                                                                                                                                                                                                                                                                                              |

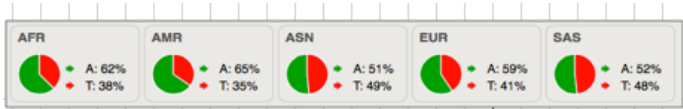

| 8               | 9               | 10              | 11              |
|-----------------|-----------------|-----------------|-----------------|
| A A A A A A A A | A A A A A A A A | A A A A A A A A | A A A A A A A A |
| T T T T T T T T | T T T T T T T T | T T T T T T T T | T T T T T T T T |
| C C C C C C C C | C C C C C C C C | C C C C C C C C | C C C C C C C C |
| G G G G G G G G | G G G G G G G G | G G G G G G G G | G G G G G G G G |
| A A A A A A A A | A A A A A A A A | A A A A A A A A | A A A A A A A A |
| T T T T T T T T | T T T T T T T T | T T T T T T T T | T T T T T T T T |
| C C C C C C C C | C C C C C C C C | C C C C C C C C | C C C C C C C C |
| T T T T T T T T | T T T T T T T T | T T T T T T T T | T T T T T T T T |
| A A A A A A A A | A A A A A A A A | A A A A A A A A | A A A A A A A A |
| T T T T T T T T | T T T T T T T T | T T T T T T T T | T T T T T T T T |
| C C C C C C C C | C C C C C C C C | C C C C C C C C | C C C C C C C C |
| T T T T T T T T | T T T T T T T T | T T T T T T T T | T T T T T T T T |
| A A A A A A A A | A A A A A A A A | A A A A A A A A | A A A A A A A A |
| T T T T T T T T | T T T T T T T T | T T T T T T T T | T T T T T T T T |
| C C C C C C C C | C C C C C C C C | C C C C C C C C | C C C C C C C C |
| T T T T T T T T | T T T T T T T T | T T T T T T T T | T T T T T T T T |
| A A A A A A A A | A A A A A A A A | A A A A A A A A | A A A A A A A A |
| T T T T T T T T | T T T T T T T T | T T T T T T T T | T T T T T T T T |
| C C C C C C C C | C C C C C C C C | C C C C C C C C | C C C C C C C C |
| T T T T T T T T | T T T T T T T T | T T T T T T T T | T T T T T T T T |
| A A A A A A A A | A A A A A A A A | A A A A A A A A | A A A A A A A A |
| T T T T T T T T | T T T T T T T T | T T T T T T T T | T T T T T T T T |
| C C C C C C C C | C C C C C C C C | C C C C C C C C | C C C C C C C C |
| T T T T T T T T | T T T T T T T T | T T T T T T T T | T T T T T T T T |
| A A A A A A A A | A A A A A A A A | A A A A A A A A | A A A A A A A A |
| T T T T T T T T | T T T T T T T T | T T T T T T T T | T T T T T T T T |
| C C C C C C C C | C C C C C C C C | C C C C C C C C | C C C C C C C C |
| T T T T T T T T | T T T T T T T T | T T T T T T T T | T T T T T T T T |
| A A A A A A A A | A A A A A A A A | A A A A A A A A | A A A A A A A A |
| T T T T T T T T | T T T T T T T T | T T T T T T T T | T T T T T T T T |
| C C C C C C C C | C C C C C C C C | C C C C C C C C | C C C C C C C C |
| T T T T T T T T | T T T T T T T T | T T T T T T T T | T T T T T T T T |
| A A A A A A A A | A A A A A A A A | A A A A A A A A | A A A A A A A A |
| T T T T T T T T | T T T T T T T T | T T T T T T T T | T T T T T T T T |
| C C C C C C C C | C C C C C C C C | C C C C C C C C | C C C C C C C C |
| T T T T T T T T | T T T T T T T T | T T T T T T T T | T T T T T T T T |

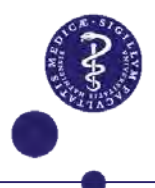

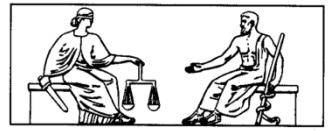

# STR sequencing nomenclature

**converge**

Upload Approve Reject Apply Changes Reset Current Data Set to Default

D5S818 11, 12

Configure Grid

| Allele | Status  | Coverage | Sequence | Long Sequence                                                   | Ref/... | RS Id's | SNP/indel Location | Coverage% | Quality |
|--------|---------|----------|----------|-----------------------------------------------------------------|---------|---------|--------------------|-----------|---------|
| 10     | STUTTER | 310      | [AGAT]10 | D5S818[CE10]-chr5-hg19 123111250-123111293 [AGAT]10             |         |         |                    |           |         |
| 11     |         | 4235     | [AGAT]11 | D5S818[CE11]-chr5-hg19 123111250-123111293 [AGAT]11             |         |         |                    |           |         |
| 11     |         | 360      | [AGAT]11 | D5S818[CE11]-chr5-hg19 123111250-123111293 [AGAT]11             |         |         | -----■-----        |           |         |
| 11     |         | 3867     | [AGAT]11 | D5S818[CE11]-chr5-hg19 123111250-123111293 [AGAT]11 123111306-G | A/G     | rs25768 | -----■-----●-----  |           | 17.69   |
| 12     |         | 2733     | [AGAT]12 | D5S818[CE12]-chr5-hg19 123111250-123111293 [AGAT]12             |         |         |                    |           |         |
| 12     |         | 2699     | [AGAT]12 | D5S818[CE12]-chr5-hg19 123111250-123111293 [AGAT]12             |         |         | -----■-----        |           |         |

**D5S818**

4500  
4000  
3500  
3000  
2500  
2000  
1500  
1000  
500  
0

10 11 12

**AN:**  
Expected Allele Number: 1-2

**OL:**  
Expected Allele(s): [6, 7, 8, 9, 10, 11, 12, 13, 14, 15, 16, 17, 18, 19, 10.1, 11.1, 12.1, 12.3]  
Deviant(s):

**Below PHR**  
Threshold (Coverage): 1270  
Allele(s):

**BST:**

**Analysis Settings**  
**Global Parameters**  
Left Anchor Length: 15  
Left Anchor Tolerance: 2  
Right Anchor Length: 15  
Right Anchor Tolerance: 2  
Use Forward Reads: True  
Use Reverse Reads: True

**STR Threshold**  
Relative Analytical Threshold: 0.02

360 stutter reads

What is the SNP-STR haplotype

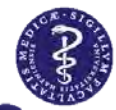



# Summary



## Nomenclature

STR region (clear definitions in STRidER)

- Start and end (genome build)
- Forward strand
- Subrepeat format

## Flanking regions

- InDels should be incorporated for back-compatibility with CE
  - PCR primers should be made available (old and new kits)
- SNPs?
  - Global nomenclature for SNP-STR - which SNPs?
  - Restrict multiplex design
  - Challenge sequencing length

Database in place (STRSeq)

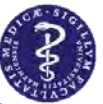

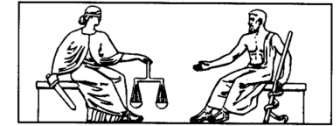

Thank you for the invitation

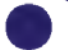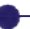



# THE SEQUENCE IDENTIFIER (SID) OPERATIONAL NOMENCLATURE FOR MIXED-DNA CASEWORK USING MPS

**STRAND Working Group Nomenclature Meeting**

**11 April 2019**

**Brian Young, Ph.D.**

**[brian@nichevision.com](mailto:brian@nichevision.com)**

**NicheVision Forensics, Inc.**

# Outline

1. Motivation
2. The Challenge of MPS Artifacts in Mixed DNA Interpretation
3. Sequence Identifier (SID) Nomenclature
4. Why We Need SID: Labeling of Artifacts by ‘Phylogeny’
5. Mixture Interpretation of Sequence-Based MPS Data Using MixtureAce™ Plugin to ArmedXpert™ Software

# Motivation

- Casework by MPS Has Been Hindered by a Lack of Available Methods for Interpreting Mixed DNA Samples
- We Developed a Mixed DNA Interpretation Method But it Requires an ‘Operational’ Nomenclature

# Outline

1. Motivation
2. The Challenge of MPS Artifacts in Mixed DNA Interpretation
3. Sequence Identifier (SID) Nomenclature
4. Why We Need SID: Labeling of Artifacts by ‘Phylogeny’
5. Mixture Interpretation of Sequence-Based MPS Data Using MixtureAce™ Plugin to ArmedXpert™ Software

# Challenges

1. Space in Computer Displays is Limited
2. Both Artifacts and Alleles Must be Labeled In Mixture Analysis
3. Artifacts are Errors, Not Polymorphisms (rs# Not Available)
4. Universal: Every Laboratory Gets Equivalent Labels for Equivalent Sequences
5. Sequence Type Labeling That is Easy to Vocalize When Discussing Profiles

## Example Screen Captures from ArmedXpert/MixtureAce

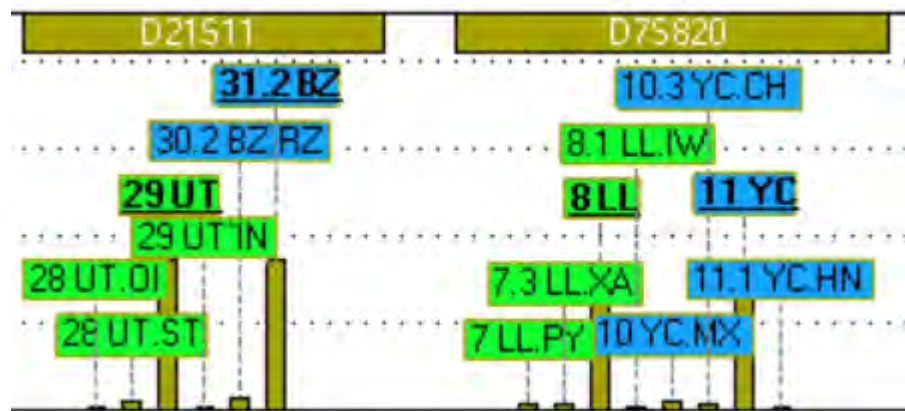

*Show Stutter and Non-Stutter Artifacts*

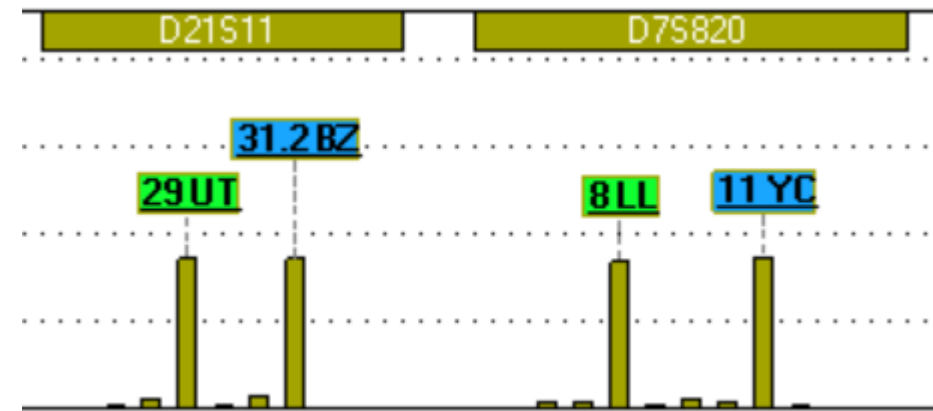

*Filter Stutter and Non-Stutter Artifacts*





# Outline

1. Motivation
2. The Challenge of MPS Artifacts in Mixed DNA Interpretation
3. Sequence Identifier (SID) Nomenclature
4. Why We Need SID: Labeling of Artifacts by ‘Phylogeny’
5. Mixture Interpretation of Sequence-Based MPS Data Using MixtureAce™ Plugin to ArmedXpert™ Software

# SID: Shorthand Labels for Sequences

Domain of "All" Forensic Sequences  
( $< 10^8$ )

Range of SID Function  
( $2^{256} \sim 26^{55} \sim 10^{77}$ )

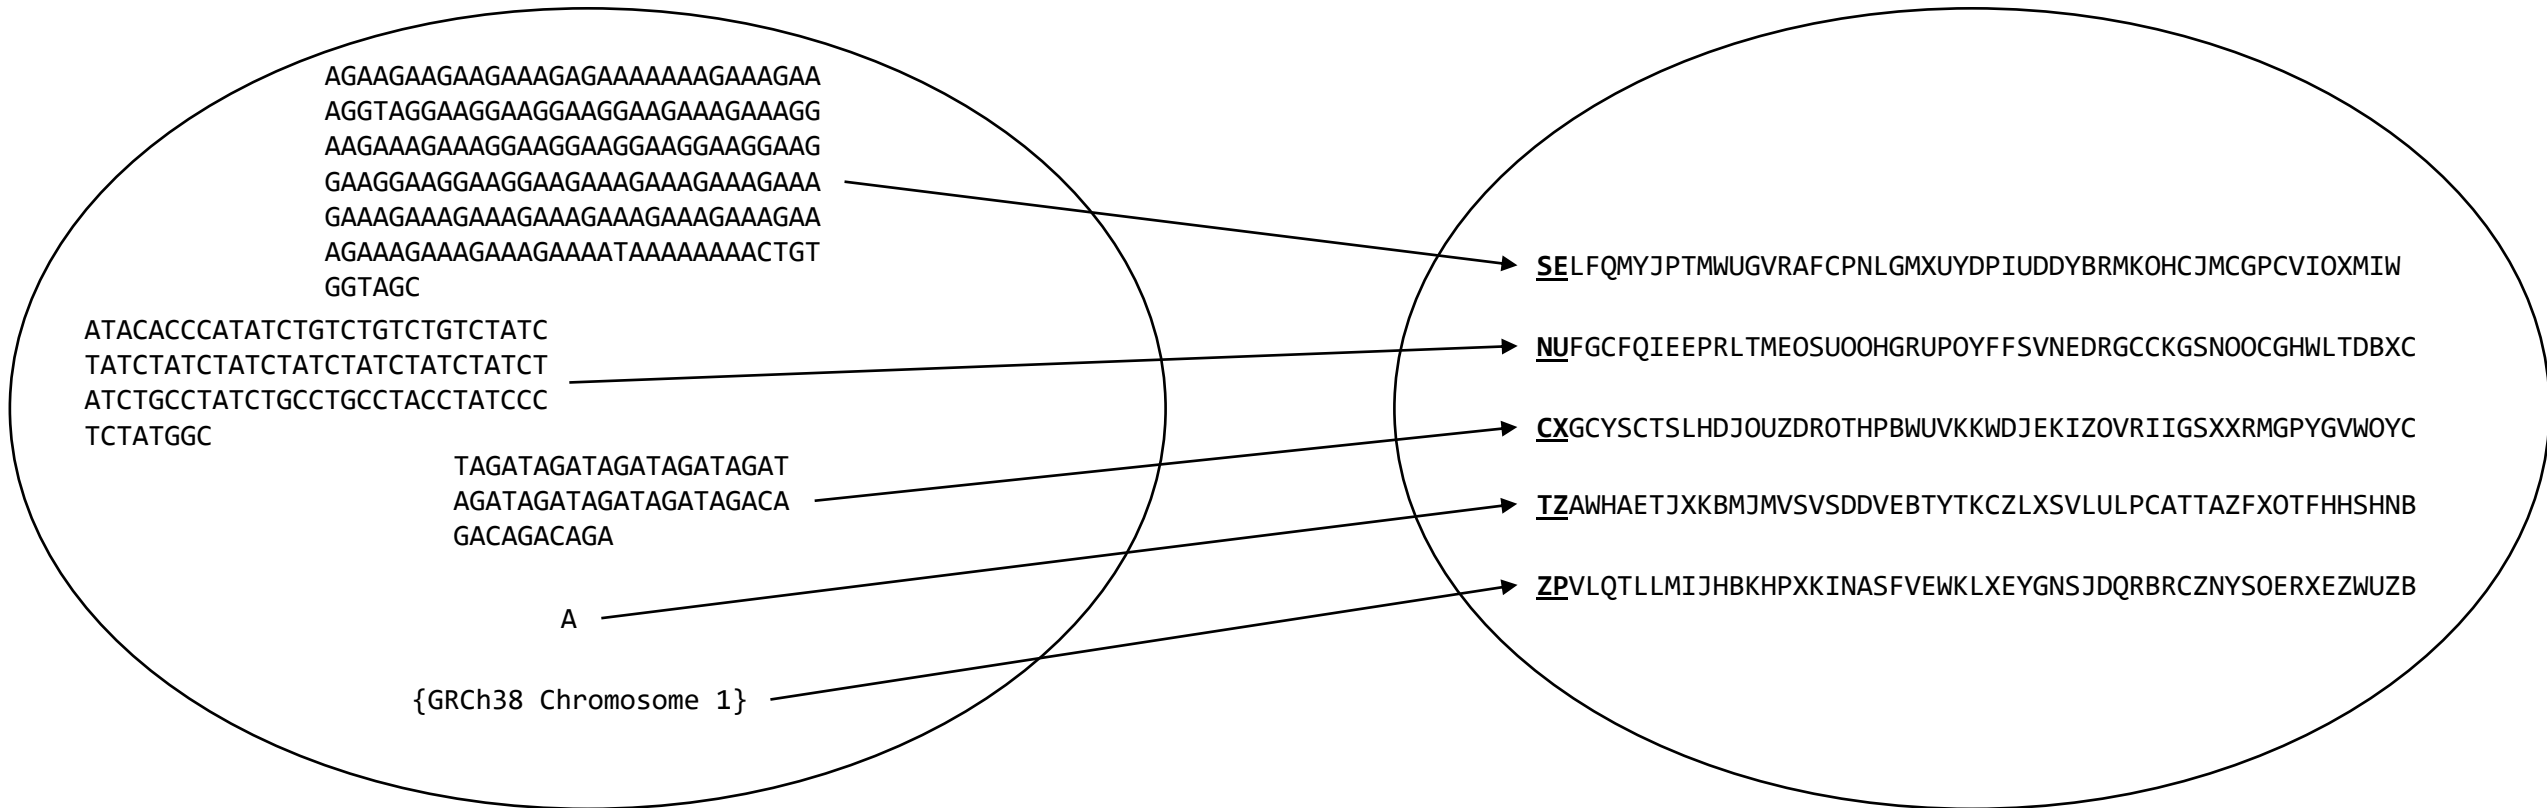

Any Sequence String → Mapping Function → 55-Character SID Label (Little-Endian)  
 Digits Arranged Least- to Most-Significant

# SIDs are Shorthand Labels for Sequences

## Domain of "All" Forensic Sequences ( $< 10^8$ )

1,000 forensic loci  
100 alleles each =  $10^8$   
1,000 trim sites each

Number of possible sequences of a 200-nucleotide amplicon =  $4^{200} \sim 10^{120}$

Number of human chromosomes on earth  $\sim (8 \times 10^9) \times (2)$   
 $\sim 1.6 \times 10^{10}$

Number of different sequences observed in allele surveys  $< \sim 100$

## Range of SID Function ( $2^{256} \sim 26^{55} \sim 10^{77}$ )

SELFQMYJPTMWUGVRAFCPNLGMXUYDPIUDDYBRMKOHCJMCGPCVIOXMIW  
NUFGCFQIEEPRLTMEOSU00HGRUPOYFFSVNEDRGCKGKSNOOCGHWTDBXC  
CXGCYSCTSLHDJOUZDROTHPBWUVKKWDJEKIZOVRIIGSXXRMGPYGVWOYC  
TZAWHAETJXKBMJMVSVDVBEVTKCZLXSVLULPCATTAZFXOTFHSHNB  
ZPVLQTLMLIJHBKHPXKINASFVEWKLXEYGNSSJQBRBCZNYSOERXEZUWZB

Any Sequence String  $\longrightarrow$  Mapping Function  $\longrightarrow$  55-Character SID Label (Little-Endian)  
Digits Arranged Least- to Most-Significant

# SIDs are Shorthand Labels for Sequences

**Domain of "All" Forensic Sequences**  
( $< 10^8$ )

1,000 forensic loci  
100 alleles each  
1,000 trim sites each  
1,000 artifacts each

$= 10^{11}$

**Range of SID Function**  
( $2^{256} \sim 26^{55} \sim 10^{77}$ )

SELFQMYJPTMWUGVRAFPCPNLGMXUYDPIUDDYBRMKOHCJMCGPCVIOXMIW  
NUFGCFQIEEPRLTMEOSU00HGRUPOYFFSVNEDRGCCCKGSNOOCGHWLTDBXC  
CXGCYSCTSLHDJOUZDROTHPBWUVKKWDJEKIZOVRIIGSXXRMGPYGVWOYC  
TZAWHAETJXKBMJMVSVSDDVEBTYTKCZLXSVLULPCATTAZFXOTFHSHNB  
ZPVLQTLLEMIJHBKHPXKINASFVEWKLXEYGNSSJQBRBCZNYSOERXEZUWZB

Any Sequence String  $\longrightarrow$  Mapping Function  $\longrightarrow$  55-Character SID Label (Little-Endian)  
 Digits Arranged Least- to Most-Significant





# Algorithm is Highly Sensitive to Small Changes In Input Strings

In cryptography, the “avalanche effect” means that nearly all digits change in response to even a single change in the input string.

| Letter Changes | Sequence String | SID Labels                                              |
|----------------|-----------------|---------------------------------------------------------|
| Base Sequence  | TAGATAGA        | EJZUKYGKYTNLXLXDTVLVGOTSMYKZJVBDKFJZLWIXEVULUGXZZDFGFJD |
| Substitution   | TAGGTAGA        | TXSUCZXTZDJWUVOCTXTTLMPNJRMUHJRUDLRFFDGWFVQQCIKYHMYFVB  |
| Deletion       | TAGATAG_        | INOGHEHOUNOGOBUYWZBCLPJOHQJMLUJUZYFWTAMSIHWKZCALUGNUAC  |
| Insertion      | TAGATAGAT       | NPUCXCAJHYLRPJWBFHTLJUCXXMYTKBAHZIUKJIBUFPJYFOEIOWLQCDB |



# Outline

1. Motivation
2. The Challenge of MPS Artifacts in Mixed DNA Interpretation
3. Sequence Identifier (SID) Nomenclature
4. **Why We Need SID: Labeling of Artifacts by ‘Phylogeny’**
5. Mixture Interpretation of Sequence-Based MPS Data Using MixtureAce™ Plugin to ArmedXpert™ Software

# 'Phylogenetic' Model of the PCR-MPS Method

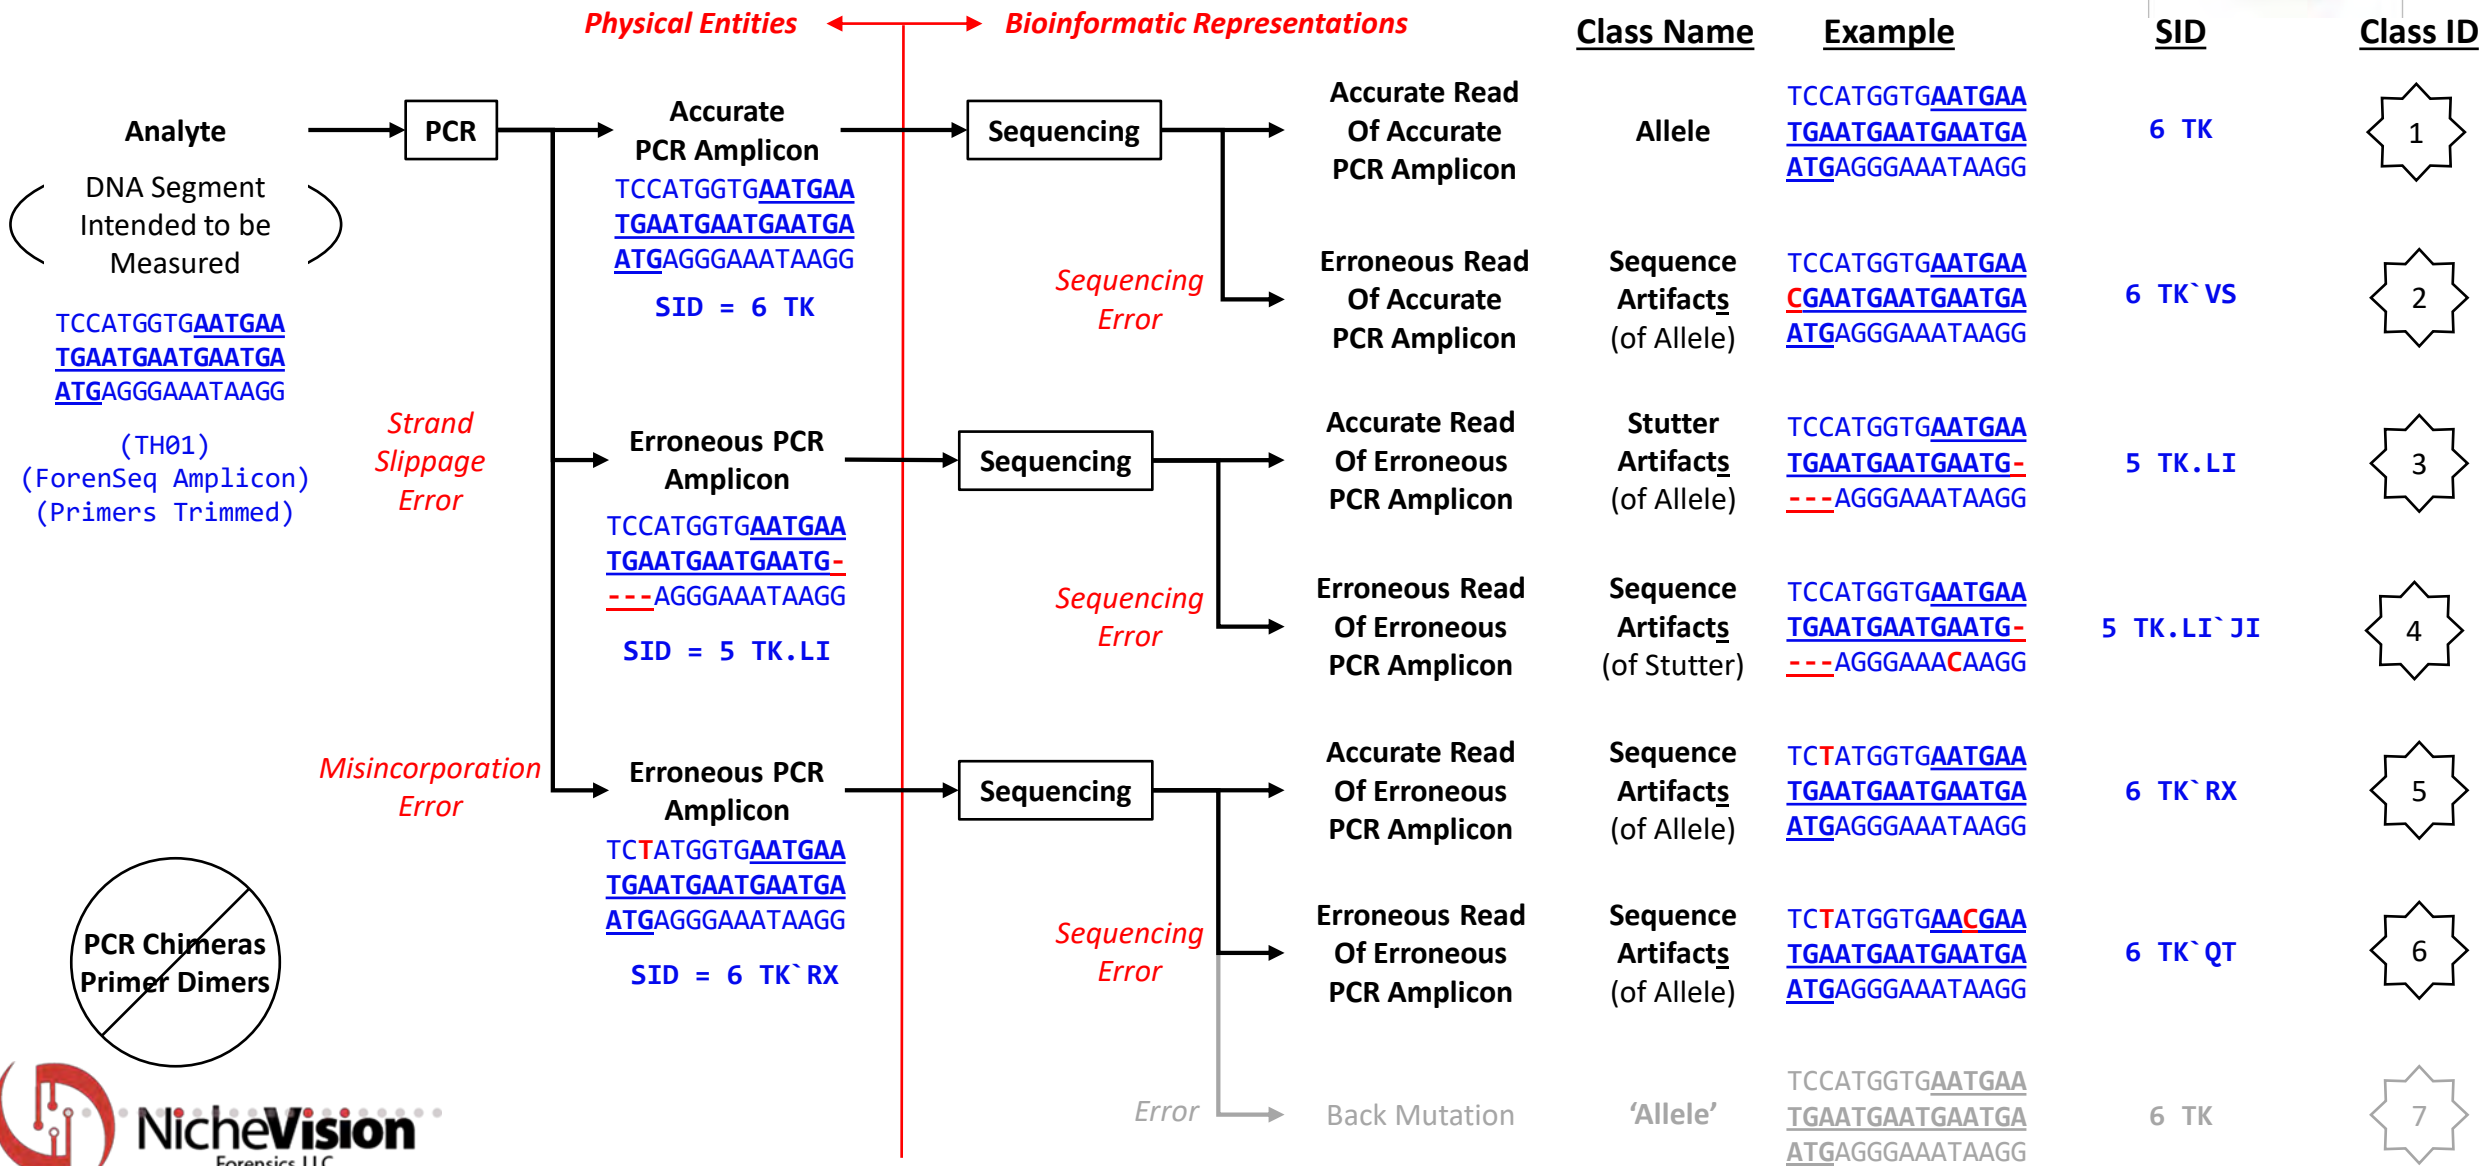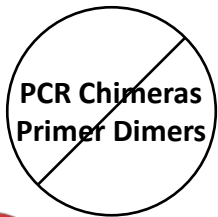



# Artifact Assignment Rules

- Shared stutter artifacts can be apportioned to multiple parent alleles
- Ambiguous non-stutter artifacts remain as candidate alleles (potential minor)
- Categories of ambiguous non-stutter artifacts:
  1. Questioned sequences that are minimally close to  $> 1$  parent
  2. Questioned sequences with minimal distances to any parent  $> \delta$

## *SID & Connector Conventions for MixtureAce Parent-Child Associations*

|                      |         |        |
|----------------------|---------|--------|
| PARENT . STUTTER     | BT . NU | (dot)  |
| PARENT ` SEQARTIFACT | BT ` HL | (tick) |

# Outline

1. Motivation
2. The Challenge of MPS Artifacts in Mixed DNA Interpretation
3. Sequence Identifier (SID) Nomenclature
4. Why We Need SID: Labeling of Artifacts by ‘Phylogeny’
5. Mixture Interpretation of Sequence-Based MPS Data Using MixtureAce™ Plugin to ArmedXpert™ Software

# 3:1 Mixture, AT = 10

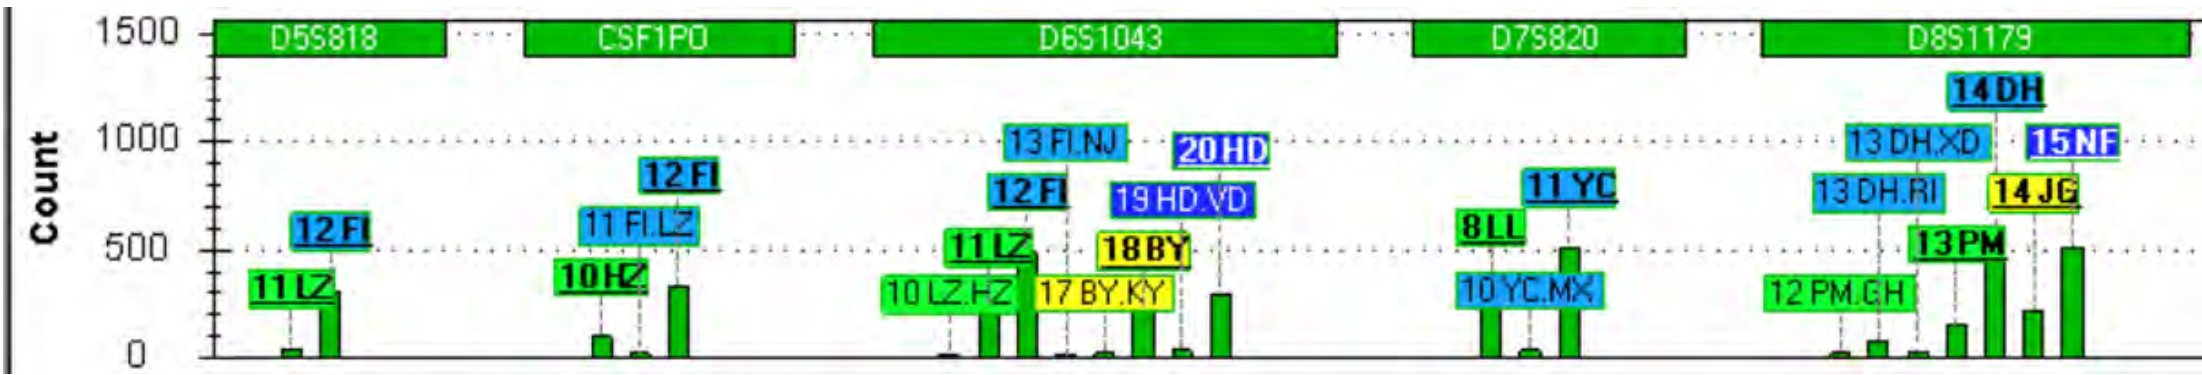

Show Artifacts

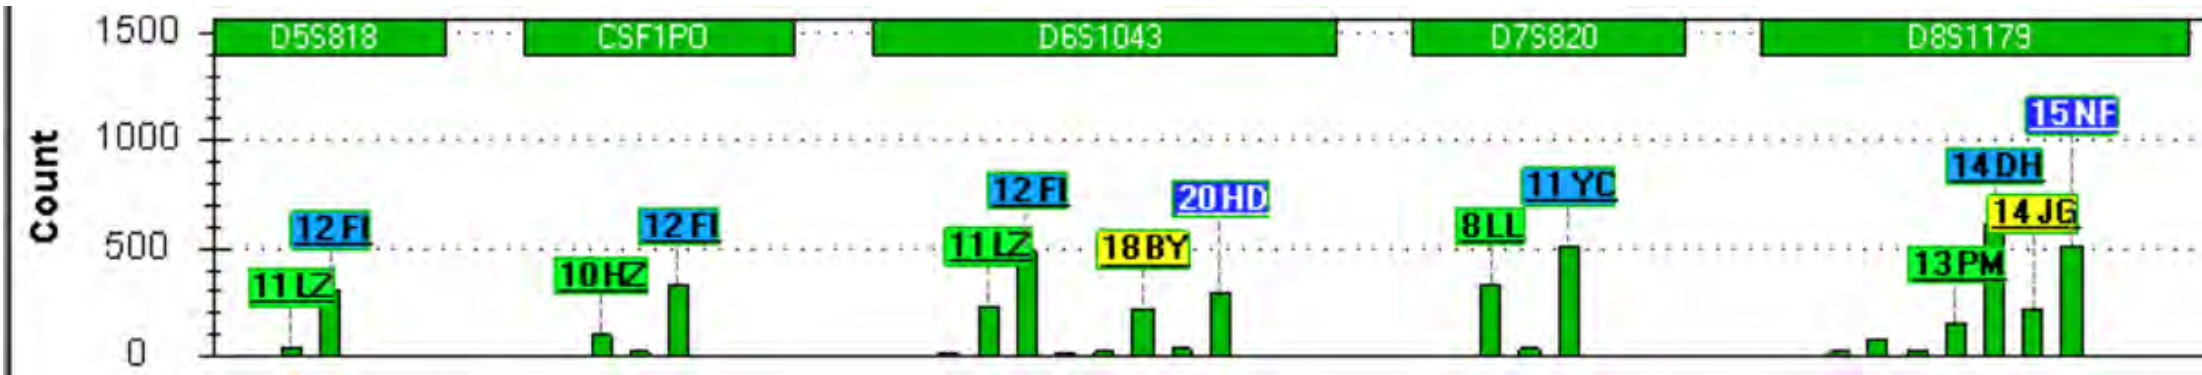

Filter Artifacts

# Isoalleles Are Displayed Separately

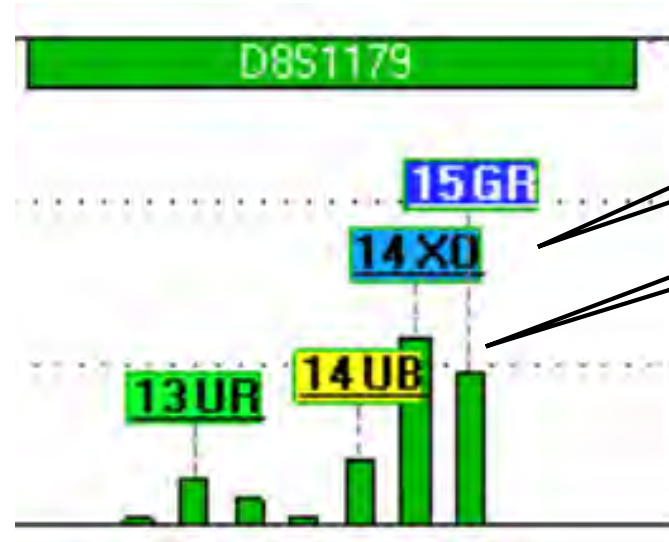

| Contributor     | Allele Length | Allele Sequence        |
|-----------------|---------------|------------------------|
| 2800M (Major)   | 14            | [TCTA]1[TCTG]1[TCTA]12 |
| 2391c-A (Minor) | 14            | [TCTA]2[TCTG]1[TCTA]11 |

# ArmedXpert Match & Comparison Tool With Sequence-Based Alleles

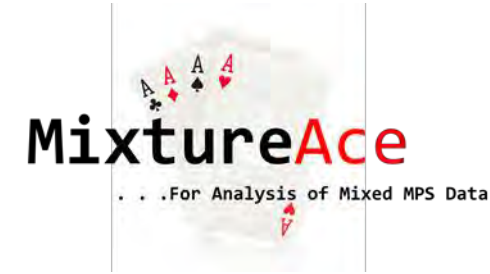

MixtureAce v1.23

Views Data QC Checks Match & Comparison Interpretation Reporting

Set Reference Find Where Reference is Included Find Included in the Reference Find Foreign to Reference Find Where Reference Includes Foreign Match & Compare Profiles Clear Match

A: Table Reference A B: Table Reference B Compare Tables Organize

Sources Windows

C:\Users\brian\OneDrive\Desktop\OCME15Feb91\2800M\_2391cA\_3\_1.fastq

|                               | FGA                 | D5S818 | CSF1PO       | D6S1043                    | D7S820      | D8S1179                    | D9S1122             | D10S1248            | TH01       |
|-------------------------------|---------------------|--------|--------------|----------------------------|-------------|----------------------------|---------------------|---------------------|------------|
| 2800M_2391cA_3_1.fastq        | 20 CV, 21 AC, 23 VR | 12 DR  | 10 FY, 12 LY | 11 EL, 12 WY, 18 TM, 20 HA | 8 PM, 11 JU | 13 UR, 14 XO, 14 UB, 15 GR | 11 OK, 12 ZG, 12 NG | 13 LR, 15 KY, 16 YK | 6 TK, 8 RZ |
| 2800M.fastq [1 Reference]     | 20 CV, 23 VR        | 12 DR  | 12 LY        | 12 WY, 20 HA               | 8 PM, 11 JU | 14 XO, 15 GR               | 12 ZG, 12 NG        | 13 LR, 15 KY        | 6 TK, 9.   |
| Exact match                   |                     |        |              |                            |             |                            |                     |                     |            |
| Included                      |                     |        |              |                            |             |                            |                     |                     |            |
| Find Where Reference Included |                     |        |              |                            |             |                            |                     |                     |            |

Clear Selection



# ArmedXpert Mixture Deconvolution With Sequence-Based Alleles



MixtureAce v1.23 - [Mixture Interpretation - DDA Interpretation 2800M\_2391cA\_3\_1.fastq]

Views Data QC Checks Match & Comparison Interpretation Reporting

Begin Mixture Interpretation Highlight Single Source Likelihood Ratio Probability of Inclusion RMP User Defined Organize

Mixture Interpretation Frequency Calculations Windows

Setup  
Pick via mouse 2800M\_2391cA\_3\_1.fastq Operations Contributor # 2

Locus D21S11 (4) Profile 01 29 KN, 31.2 TK P. Avg(0.74)  
Profile 02 28 TC, 32.2 SL P. Avg(0.26)

Alleles 28 TC, 29 KN, 31.2 TK, 32.2 SL  
RFUs 110, 266, 360, 84  
BPs 183, 187, 197, 201

Peaks  
Apply Globally 100% Profile 01  
Apply Stutter 0.09

|            | 28 TC                               | 29 KN                               | 31.2 TK                             | 32.2 SL                             |
|------------|-------------------------------------|-------------------------------------|-------------------------------------|-------------------------------------|
| Profile 01 | <input type="checkbox"/>            | <input checked="" type="checkbox"/> | <input checked="" type="checkbox"/> | <input type="checkbox"/>            |
| Profile 02 | <input checked="" type="checkbox"/> | <input type="checkbox"/>            | <input type="checkbox"/>            | <input checked="" type="checkbox"/> |

Mixture Information  
All combinations have: PHr >= 0, MPh >= 0, mP >= 0.1

For a 2-contributor 4-allele mixture of types AB & CD: 3/3-combination(s):  
 31.2 TK, 32.2 SL(phr = 0.23; p = 0.54) • 28 TC, 29 KN(phr = 0.41, p = 0.46)  
 28 TC, 31.2 TK(phr = 0.31; p = 0.57) • 29 KN, 32.2 SL(phr = 0.32; p = 0.43)  
 29 KN, 31.2 TK(phr = 0.74; p = 0.76) • 28 TC, 32.2 SL(phr = 0.76; p = 0.24)

Mixture Interpretation of 2800M\_2391cA\_3\_1.fastq

|  | 28 TC | 29 KN | 31.2 TK | 32.2 SL |
|--|-------|-------|---------|---------|
|  | 110   | 266   | 360     | 84      |

PHr 0.00 Multi PHr  
mPH 0 HT 75  
mP 0.10  
Popout calls View call report Add Comment

# ArmedXpert Mixture Deconvolution Call Report

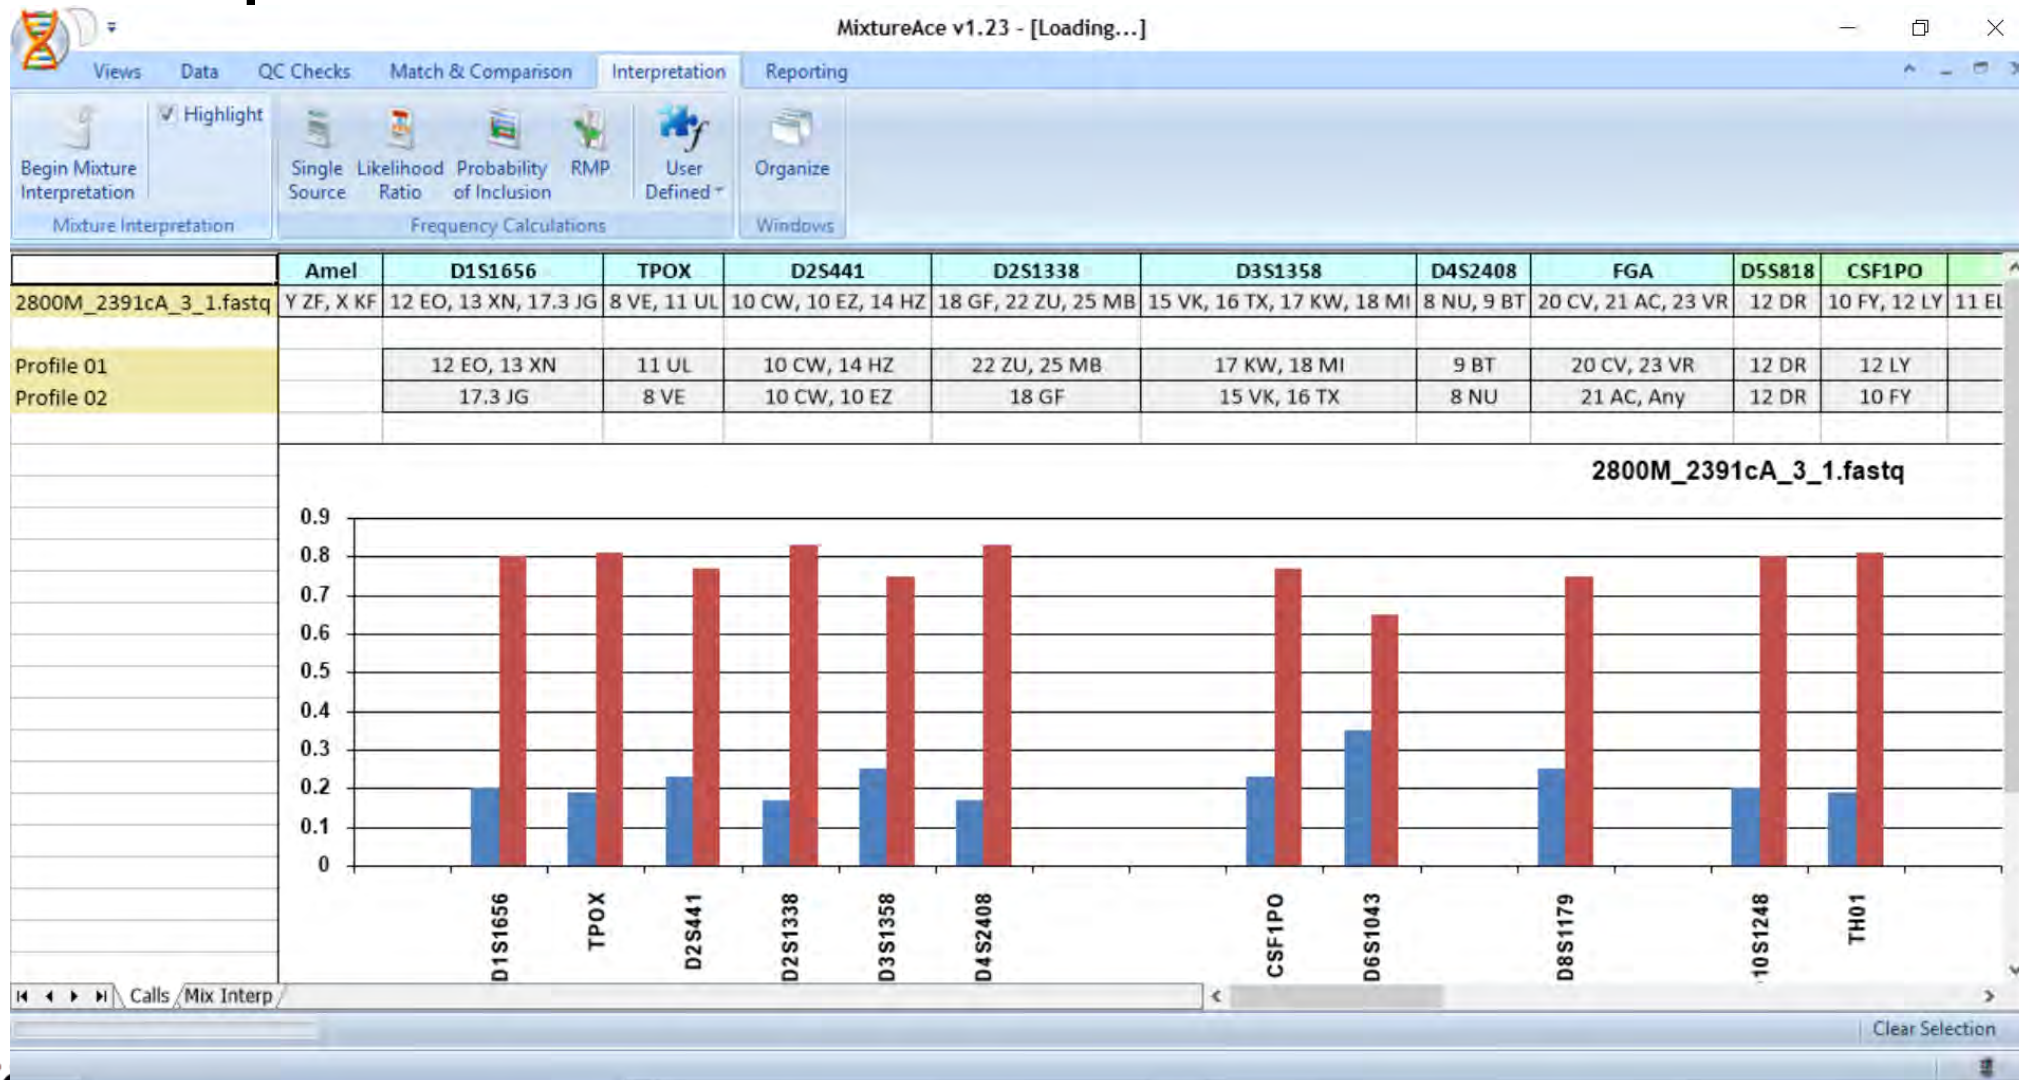





# Acknowledgements

- SID Nomenclature
  - Nate Caldwell
  - Tom Faris
- Data
  - Dr. Elisa Wurmbach OCME
  - Dr. Michael Marciano, Syracuse U.
- Software Development
  - Luigi Armogida
  - Tom Faris
  - Abdul Alali

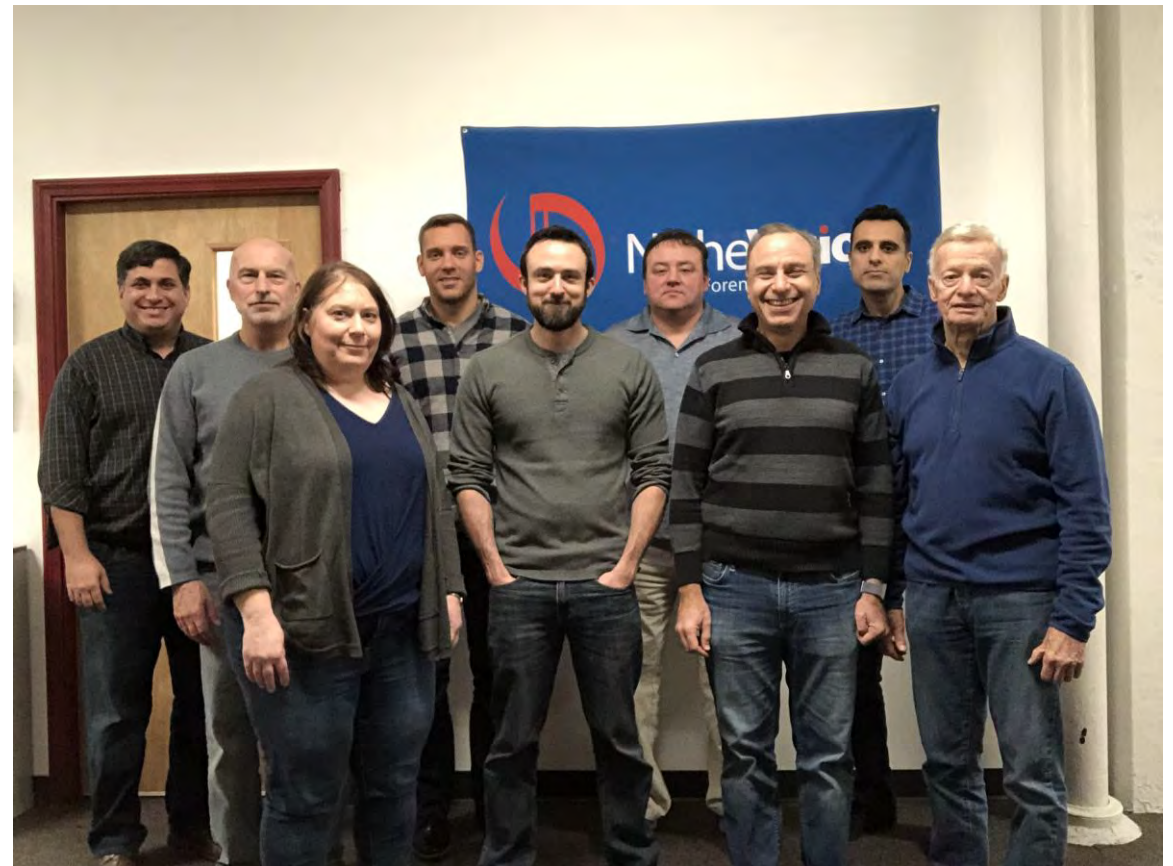





- **Lab-staff:** Kristiaan van der Gaag  
Thirsa Kraaijenbrink  
Rick van Leeuwen  
Jerry Hoogenboom

### Practical Issues:

- We now have to describe sequence variation.
- We have a unique opportunity to repair forward – reverse mistakes.
- There will be “repeat” confusion (N-CE  $\neq$  N-MPS).
- Have to deal with SNP variation.
- There is already a HGVS nomenclature in use.
- Describing MPS – STR variants in reports (articles) must be compatible with CE – STR results.
- Allele input in stat-progs and databases.

### Two choices:

- A one size fits all solution (a code).
- A set of different solutions.

### Minimal criteria:

- No online only repository / coding solution.
- Should be able to accommodate kit design variation.
- Accept FASTA – format.

# MPS - STR Nomenclature

## nomenclature challenges

|                |              |              |              |              |              |
|----------------|--------------|--------------|--------------|--------------|--------------|
| D13S317-11     | TCTAACGCCT   | ATCTGTATTT   | ACAAATACAT   | -TATC-TATC   | -TATC-TATC   |
| D13S317 [CE12] | .....A...    | .....        | .....        | -.....-..... | -.....-..... |
| D13S317-11     | -TATC-TATC   | -TATC-TATC   | -TATC-TATC   | -TATC-----   | -----AATC    |
| D13S317 [CE12] | -.....-..... | -.....-..... | -.....-..... | -.....-TATC  | -TATC-.....  |
| D13S317-11     | -AATC-ATCT   | -ATCT-ATCT   | -TT          |              |              |
| D13S317 [CE12] | -----.....   | -.....-..... | -..          |              |              |

D13S317[CE11]-Chr13-GRCh37-g.82.722.160:82.722.223-TATC[11]AATC[2]ATCT[3]

D13S317[CE12]-Chr13-GRCh37-g.82.722.160:82.722.223-TATC[13]AATC[1]ATCT[3]-g.x.136G>A

D13S317[CE12] - TATC[13]AATC[1]ATCT[3] – 24 136G>A

D13S317[CE12] – 101





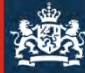

## Different naming approaches for each situation

- The entire sequence
  - Exchange of data
  - Software processing and storage in database
- **Human-readable format; preserving sequence information**
  - **Publications, presentations, reports, etc.**
  - **Manual profile interpretation**
  - **Within-case manual comparisons**
- Very short code
  - Compact tables
  - Software that can't handle complete sequences

STRNaming

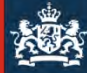

# Our focus: human-interpretable names

- One unique name describing one sequence
  - One-to-one relationship
- Sequence-descriptive
  - Small change in sequence → small change in name
  - The exact sequence change is obvious from the name
  - **Essential** in interpreting stutters/hybrids/artefacts by humans!
- Standardised and automated
  - Should work the same on any locus in current or future use
  - Don't want to spend weeks working out the details of a locus
  - Publically available online & offline; open source algorithm

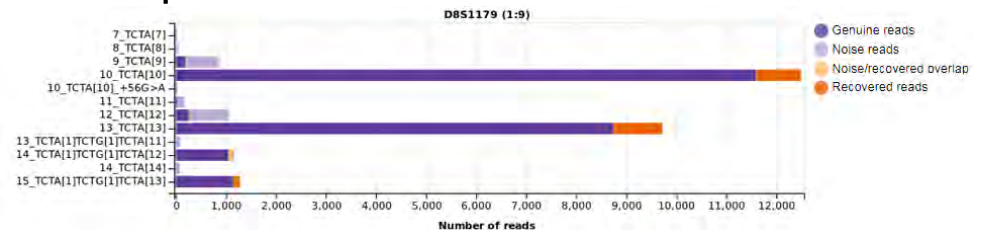

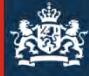

# Definitions

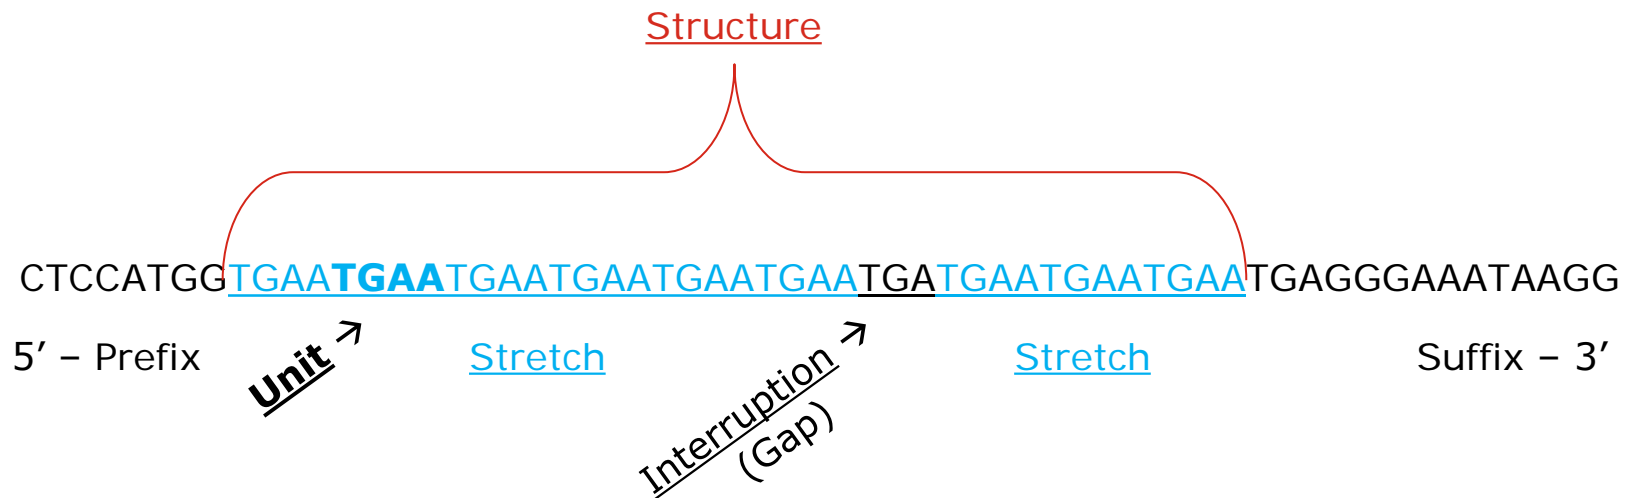



## Which name would you prefer?

CTCCATGGTGAATGAATGAATGAATGAATGAATGATGAATGAATGAATGAGGGAAATAAGG

CTCCATGGTGAATGAATGAATGAATGAATGAATGATGAATGAATGAATGAGGGAAATAAGG

CTCCATGGTGAATGAATGAATGAATGAATGAATTGATGAATGAATGAATGAGGGAAATAAGG

CTCCATGGTGAATGAATGAATGAATGAATGAATGATGAATGAATGAATGAGGGAAATAAGG

CTCCATGGTGAATGAATGAATGAATGAATGAATTGATGAATGAATGAATGAGGGAAATAAGG

1. **ATGA[6]**TGA[1]**ATGA[3]** Nice! Two stretches of the same repeat unit!
2. **TGAA[6]**TGA[1]**TGAA[3]** Nice! Moved 5' as far as possible!
3. **ATGA[6]****TGAA[3]** Nice! No interruptions!
4. **TGAA[6]**TGA[2]**ATGA[3]** Nice! Only repeats, no interruptions, short prefix/suffix!

→ None of these is bad!

Also, which locus is this?



## Which name would you prefer?

CTCCATGGTGAATGAATGAATGAATGAATGAATGATGAATGAATGAATGAGGGAAATAAGG 9.3

CTCCATGGTGAATGAATGAATGAATGAATGAATGATGAATGAATGAATGAGGGGAAATAAGG 9.3

CTCCATGGTGAATGAATGAATGAATGAATGAATTGATGAATGAATGAATTGAGGGAAATAAGG 9.3

CTCCATGGTGAATGAATGAATGAATGAATGAATGATGAATGAATGAATGAGGGAAATAAGG 9.3

CTCCATGGTGAATGAATGAATGAATGAATGAATTGATGAATGAATGAATGAGGGAAATAAGG 9.3

CE9.3 **ATGA**[6]TGA[1]**ATGA**[3]

Nice! Two stretches of the same repeat unit!

CE9.3 **TGAA**[6]TGA[1]**TGAA**[3]

Nice! Moved 5' as far as possible!

CE9.3 **ATGA**[6]**TGAA**[3]

Nice? No interruptions!

CE9.3 **TGAA**[6]TGA[2]**ATGA**[3]

Nice? Only repeats, no interruptions, short prefix/suffix!

→ Do we care about the CE number?

→ What would allele 9 look like?





# Which name would you prefer?

CTCCATGGTGAATGAATGAATGAATGAATGAATGAATGAATGAATGAGGGAAATAAGG 9

CTCCATGGTGAATGAATGAATGAATGAATGAATGAATGAATGAATGAGAGGGAAATAAGG 9

CTCCATGGTGAATGAATGAATGAATGAATGAATGAATGAATGAATGAATGAGGGAAATAAGG 9

CTCCATGGTGAATGAATGAATGAATGAATGAATGAATGAATGAATGAGGGAAATAAGG 9

CTCCATGGTGAATGAATGAATGAATGAATGAATGAATGAATGAATGAAGGGAAATAAGG 9

CE9.3 **ATGA**[6]TGA[1]**ATGA**[3]

CE9.3 **TGAA**[6]TGA[1]**TGAA**[3]

CE9.3 **ATGA**[6]**TGAA**[3]

CE9.3 **TGAA**[6]TGA[2]**ATGA**[3]

CE9 **ATGA**[9]

CE9 **TGAA**[9]

CE9 **ATGA**[8]A[1]

CE9 **TGAA**[9]TGA[1]

Nice!

Nice!

Need to account for the extra A...

Name has changed a lot?

→ We have 100s of markers more...



# Our solution!

## STRNaming

- Figures out what is repeated
- Figures out the nicest way of shortening that
  - The rules aren't simple, but STRNaming does it for you
- Apply some pretty notation...
- Done!

## Availability

- Free online & offline STRNaming tools
- Open-source the algorithm



But how?

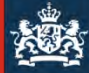

## The reference sequence

1. Find longest repeat stretch → *extract repeat unit only*
  - Repeat until no more non-overlapping stretches are found
2. Shift the extracted units (optional step)
  - E.g., CTAT → TATC, ATCT, TCTA
3. Find all stretches of all extracted units (ignoring overlap)
4. Select the nicest combination of repeat stretches (structure)

1. CTTCTATCTATCTATCTATCTATCTATCTATCTATCTATCTAATCTATCTATCTTCA  
CTAT ATCT

2. CTAT TATC ATCT TCTA

3. CTTCTATCTATCTATCTATCTATCTATCTATCTATCTATCTAATCTATCTATCTTCA  
CTTCCTATCTATCTATCTATCTATCTATCTATCTATCTATCTAATCTATCTATCTTCA  
CTTCCTATCTATCTATCTATCTATCTATCTATCTATCTATCTAATCTATCTATCTTCA  
CTTCCTATCTATCTATCTATCTATCTATCTATCTATCTATCTAATCTATCTATCTTCA

4. CTTCTATCTATCTATCTATCTATCTATCTATCTATCTAATCTATCTATCTTCA



# The reference sequence

- From the reference, we store:
  - Which repeat **units** were used in its name → TCTA, ATCT
  - The prefix and suffix sequence → CTTCCTA, TCA
  - The sequence of the longest interruption (if very long) → n/a
  - Its length and CE allele number → 58bp = CE9

Sequence:

CTTCCTATCTATCTATCTATCTATCTATCTATCTATCTATCTAATCTATCTATCTTCA

Structure:

CTTCCTA(1)TCTA(9)ATCT(3)TCA(1)

Name:

CE9\_TCTA[9]ATCT[3]



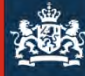

# Naming other sequences

- From the reference, we had stored:
  - Which repeat **units** were used in its name → TCTA, ATCT
  - The prefix and suffix sequence → CTCCTA, TCA
  - The sequence of the longest interruption (if very long) → n/a
  - Its length and CE allele number → 58bp = CE9

- Find all stretches of TCTA and ATCT (ignoring overlap)

CTTCCTATCTATCTATCTATCTATCTATCTATCTATCTATCTATCTATCTTCA  
CTTCCTATCTATCTATCTATCTATCTATCTATCTATCTAATCTATCTATCTTCA

- Select the nicest combination of repeat stretches (structure)

CTTCCTATCTATCTATCTATCTATCTATCTATCTATCTAATCTATCTATCTTCA

- Find and shorten repeat stretches in interruptions

- Can use repeat units other than TCTA and ATCT

- Convert the structure into an allele name

- Simply a matter of notation, e.g.: CE9\_TCTA[9]ATCT[3]



## But what is nice???

Calculate a score for each STR structure

- Bonus points for:
  - Every base covered by a repeat
  - Every repeat of a unit
  - Every interruption that is exactly  $x$  repeat units long
- Penalty points for:
  - Every distinct repeat unit used
  - Every interruption introduced between stretches
  - Every base in an interruption
  - Every base inserted or deleted in the prefix or suffix

**Same for  
all loci!**

How many points? → Mostly common sense, expert opinion needed for the complex alleles

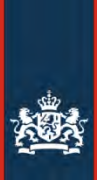

# Some words on notation

- Variation in suffix

GGTAAACAGTATAATTTTC[10]TATTTG**A**AATGGA  
 CE10\_

GGTAAACAGTATAATTTTC[10]**+**7**A>**C  
 CE10\_

GGTAAACAGTATAATTTTC[10]**+**9**A>**-  
 CE9.3\_

GGTAAACAGTATAATTTTC[10]**+**9.1**->**A  
 CE10.1\_



## Some words on notation

- Variation in prefix

GGTA**A**CAGTATATTTCTTTCTTTCTTTCTTTCTTTCTTTCTTTCTTTCTTTCTTTCTTTCTTTCTTTCTATTGAAATGGA  
 CE10\_TTTTC[10]

10 9 8 7 6 5 4 3 2 1  
 GGTA**C**CAGTATATTTCTTTCTTTCTTTCTTTCTTTCTTTCTTTCTTTCTTTCTTTCTTTCTTTCTATTGAAATGGA  
 CE10\_TTTTC[10]\_-9A>C

10 9 7 6 5 4 3 2 1  
 GGTAACAGTATATTTCTTTCTTTCTTTCTTTCTTTCTTTCTTTCTTTCTTTCTTTCTTTCTATTGAAATGGA  
 CE9.3\_TTTTC[10]\_-8A>-

10 9 8 7 6 5 4 3 2 1  
 GGTA**AA**A**A**CAGTATATTTCTTTCTTTCTTTCTTTCTTTCTTTCTTTCTTTCTTTCTTTCTTTCTATTGAAATGGA  
 CE10.1\_TTTTC[10]\_-8.1->A



# Some words on notation

- Large interruptions (example: DYS389)

AGATTGATAGAGGGAGGGGATAGATAGATAGATAGATAGATAGATAGATAGATAGATAGATAGACAGACAGACAGATACATAGATAATACAGA  
DYS389I CE12\_GATA[9]GACA[3]

AGATTGATAGAGGGAGGGGATAGATAGATAGATAGATAGATAGATAGATAGATAGATAGATAGACAGACAGACAGATACATAGATAATACAGATGAGAGTTG  
GATACAGAAGTAGGTATAATGATAGATAGATAGATAGATAGATAGATAGATAGATAGATAGATAGATAGATAGACAGACAGACAGACAGACAGACAC  
ACACATAGATAATACAGA

DYS389II CE29\_GATA[9]GACA[3][ ]GATA[12]GACA[6] 

AGATTGATAGAGGGAGGGGATAGATAGATAGATAGATAGATAGATAGATAGATAGATAGATAGACAGACAGACAGATAGATAGATAATACAGATGAGAGTTG  
GATACAGAAGTAGGTATAATGATAGATAGATAGATAGATAGATAGATAGATAGATAGATAGATAGATAGATAGACAGACAGACAGACAGACAGACAC  
ACACATAGATAATACAGA

DYS389II CE29\_GATA[9]GACA[3][3C>G]GATA[12]GACA[6]





Eager to try it out?  
Just drop me a line!

[j.hoogenboom@nfi.nl](mailto:j.hoogenboom@nfi.nl)



## Final remarks

Ideas on the to-do list:

- Auto-convert to forward strand: ISFG reconsideration
- Analyse reference sequence with more upstream and downstream sequence content
  - Stabilises names across kits
  - Auto-determine analysed range per kit
  - Provide table of analysed range

→ We are happy to share what we've got!

→ We are open for suggestions and improvements!



## Acknowledgements

### **LUMC (FLDO)**

- Rick de Leeuw
- Peter de Knijff

### **King's College / Verogen**

- Laurence Devesse

### **NFI**

- Titia Sijen

### **STRAND Working Group**

*Thank  
you*

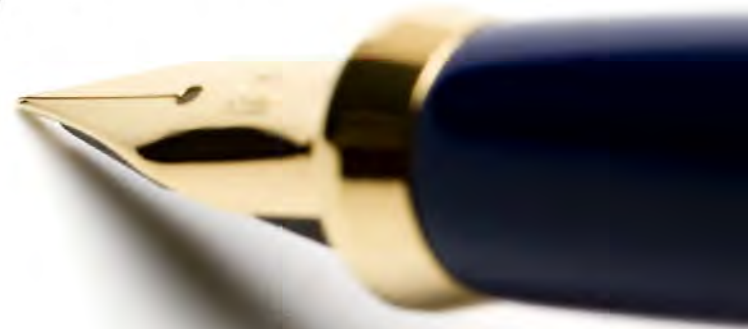

# Some rough thoughts

Peter Gill, Oyvind Bleka

April 11, 2019

STR Nomenclature Meeting, London, UK

# Mixtures

- Probabilistic genotyping open-source software EuroForMix
- Modules that can analyse SNPs and STRs using LUS
- We are designing software that will convert sequences into LUS primary, secondary, tertiary etc.
- When we analyse mixtures, we will encounter genotypes for which a reference sample is not available.
- Also we cannot tell if a sequence that is in an apparent stutter position of a major contributor, is indeed a stutter.
  - We cannot make the assumption of stutter – but we can filter low level products.



# Mixtures

- When we go to court we report the strength of evidence
  - E.g.. the probability of the evidence if it has come from Mr X and an unknown individual(s) vs. the probability of the evidence if it has come from x unknown individuals.
- With numerous loci to contend with and large numbers of case-stains, it becomes very time-consuming to suggest that the operator should examine each locus separately
- Consequently, we are looking towards complete automation of the interpretation process where the output that the court is interested in is the likelihood ratio.
- Strictly we don't need nomenclature to do this, we can use raw sequence.

# Why do we need a nomenclature at all?

- It is feasible to use raw strings of sequenced bases for computers
- But for database searches there must be a way to compare strings with traditional nomenclature – i.e. back-compatibility..
- Sequence strings need to be available and tied to a nomenclature, whatever it may be.
- It is easy for a computer to turn a string into a designation using a look-up table.

# Stutters

- In probabilistic genotyping it is a requirement to identify stutters.
- The LUS method will do this, but we also have to consider secondary and tertiary LUS because these will also stutter, albeit at lower levels.
- Given an allele, the expectation of a given stutter is probabilistic, and the probability of stutter, and its sequence, will be dependent upon the length of the parent allele.
- Many of the 'exotic' stutters will be very low level, and the evidential value would be low – they could be filtered. But we can anticipate that they may be important with future iterations of probabilistic genotyping. Consequently we should build this into the existing strategy in order to prevent having to revisit at a later time.

# Examples using D21S11

- There are 5x type 37.2 variants

|                                                                                                                    | RU     | LUS1 | LUS2 | LUS3 |
|--------------------------------------------------------------------------------------------------------------------|--------|------|------|------|
| [TCTA] <sub>7</sub> [TCTG] <sub>14</sub> [TCTA] <sub>3</sub> TCA [TCTA] <sub>2</sub> TCCA TA [TCTA] <sub>12</sub>  | 39.2.3 | 14   | 12   | 7    |
| [TCTA] <sub>9</sub> [TCTG] <sub>12</sub> [TCTA] <sub>3</sub> TCA [TCTA] <sub>2</sub> TCCA TA [TCTA] <sub>12</sub>  | 39.2.3 | 12   | 12   | 9    |
| [TCTA] <sub>9</sub> [TCTG] <sub>13</sub> [TCTA] <sub>3</sub> TCA [TCTA] <sub>2</sub> TCCA TA [TCTA] <sub>11</sub>  | 39.2.3 | 13   | 11   | 9    |
| [TCTA] <sub>10</sub> [TCTG] <sub>11</sub> [TCTA] <sub>3</sub> TCA [TCTA] <sub>2</sub> TCCA TA [TCTA] <sub>12</sub> | 39.2.3 | 12   | 11   | 10   |
| [TCTA] <sub>11</sub> [TCTG] <sub>11</sub> [TCTA] <sub>3</sub> TCA [TCTA] <sub>2</sub> TCCA TA [TCTA] <sub>11</sub> | 39.2.3 | 11   | 11   | 11   |

All the same

35.2 variant

[TCTA]<sub>5</sub> [TCTG]<sub>6</sub> [TCTA]<sub>3</sub> TA [TCTA]<sub>3</sub> TCA [TCTA]<sub>2</sub> TCCA TA [TCTA]<sub>15</sub> TA TCTA

36.2.2.2.3;15;6;5;3;3;2

# Stutter

|                                                                                                                   |  |  |  |  |  |  |  |                |
|-------------------------------------------------------------------------------------------------------------------|--|--|--|--|--|--|--|----------------|
| 37.2 variant                                                                                                      |  |  |  |  |  |  |  | LUS notation   |
| [TCTA] <sub>7</sub> [TCTG] <sub>14</sub> [TCTA] <sub>3</sub> TCA [TCTA] <sub>2</sub> TCCA TA [TCTA] <sub>12</sub> |  |  |  |  |  |  |  | 39.2.3;14;12;7 |

| RU     | LUS1 | LUS2 | LUS3 |                           |
|--------|------|------|------|---------------------------|
| 39.2.3 | 14   | 12   | 7    | Parent allele             |
| 38.2.2 | 13   | 12   | 7    | -1 stutter                |
| 38.2.2 | 14   | 11   | 7    | -1 stutter                |
| 38.2.2 | 14   | 12   | 6    | -1 stutter                |
| 37.2.2 | 13   | 12   | 6    | -1 stutter at 2 positions |

Repeat exercise for +1 stutters, -2 stutters and multiple stutters

Type 37.2 variant where, primary, secondary, tertiary LUS are the same length

$[TCTA]_{11} [TCTG]_{11} [TCTA]_3 TCA [TCTA]_2 TCCA TA [TCTA]_{11}$  **39.2.3;11;11;11**

The notation does not tell us the order in the sequence, but this could be rectified by ordering the LUS variants as they appear e.g. 39;11;11;3;.3;2;1;.1;11  
But this is a bit unwieldy



# Conclusion

- Computers can take raw sequence and turn it into a local nomenclature that can be used for a particular software.
- LUS notation is probably sufficient if we use it on a per case basis – more difficult for a universal nomenclature.
- Within case a) we need to identify an allele b) we need to apply a frequency (use sequence comparison for this).
- A local nomenclature based on LUS is useful to assess stutters.
- But this can be local – per case.

# Nomenclature

EuroForMix

STRidER

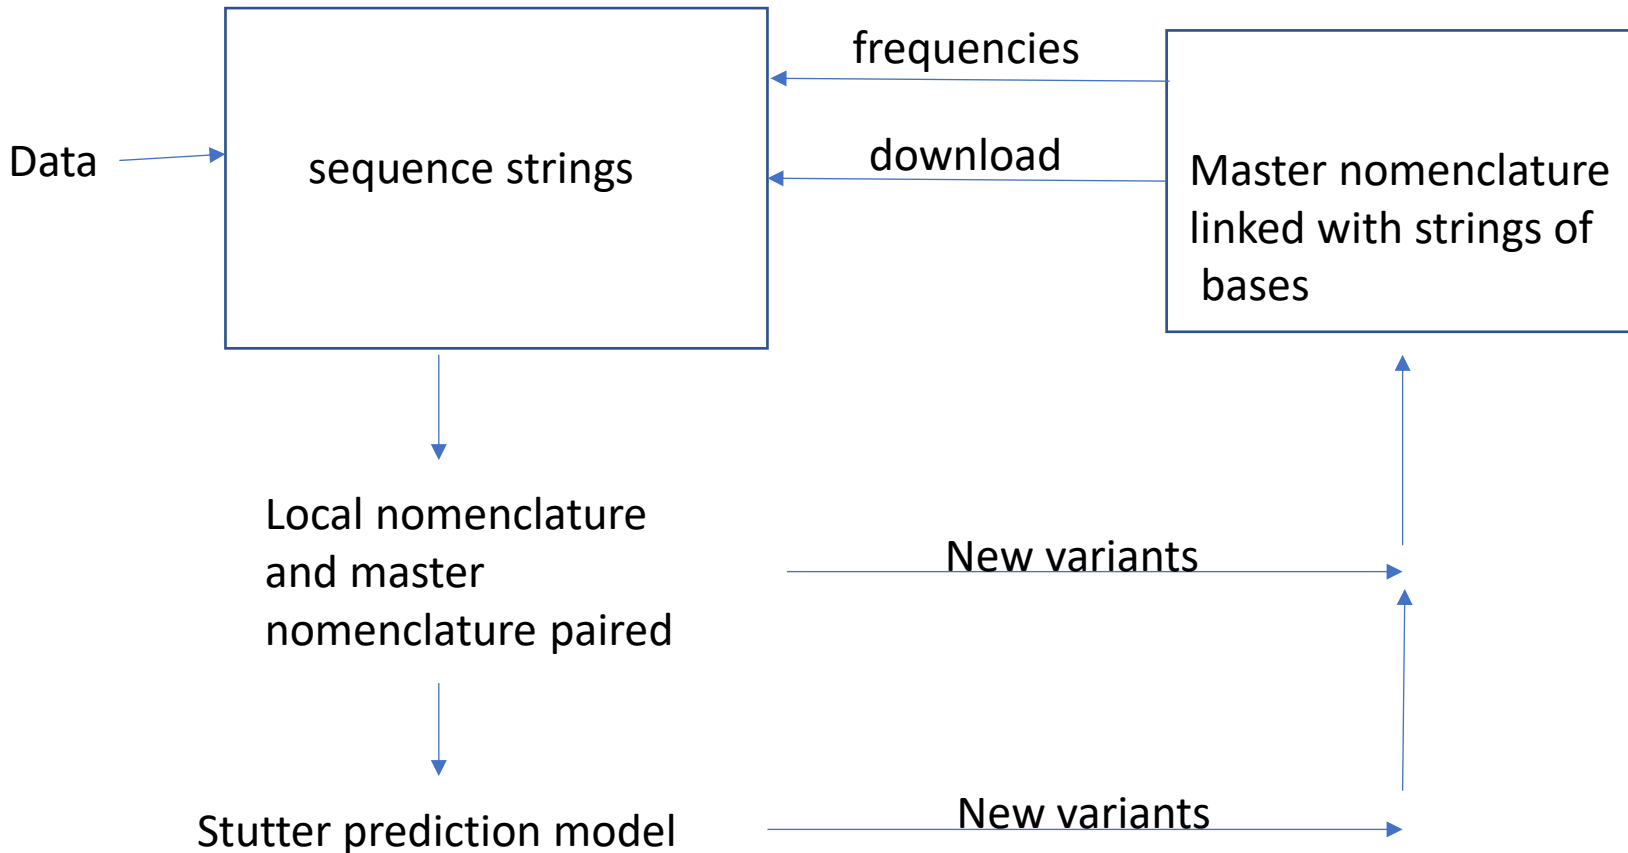

# TOASTR

A user-friendly web app  
for STR sequencing

# LABCON-OWL

## CORE BUSINESS

- clinical molecular diagnostics
- forensic DNA analysis

## RESEARCH & DEVELOPMENT

- forensic multiplex kits for MPS
- bioinformatics solution for MPS-STR genotyping

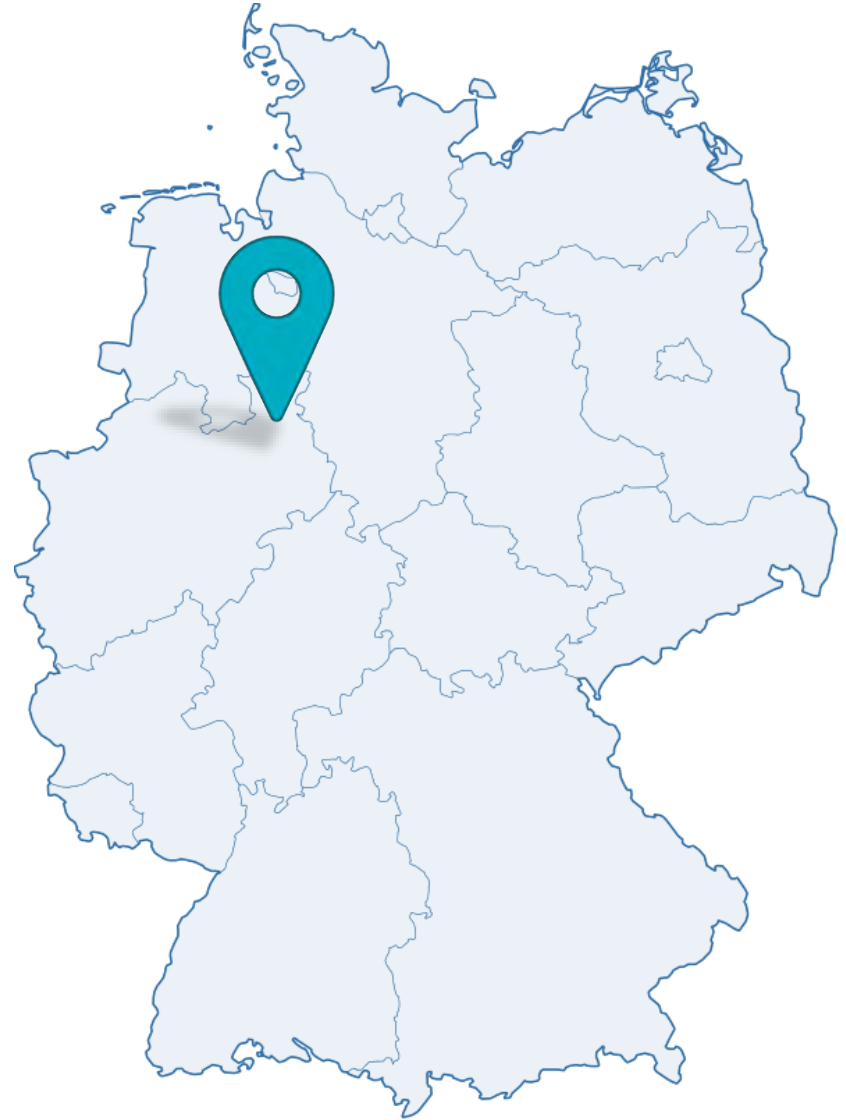

# Landscape of open-access genotyping tools

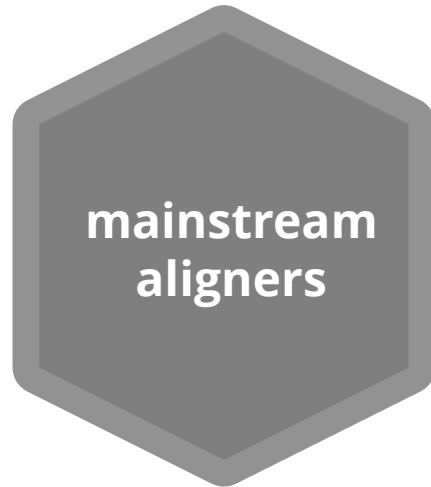

**mainstream  
aligners**

- gapped alignment problem:  
trade-off between runtime and accuracy
- bias due to incomplete reads
- do not report genotypes
- no stutter/noise modelling

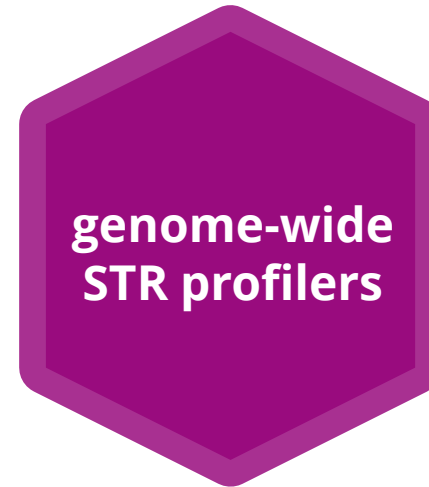

**genome-wide  
STR profilers**

- „selective“ alignment
- use whole-genome data
- legally and technically  
out of scope?

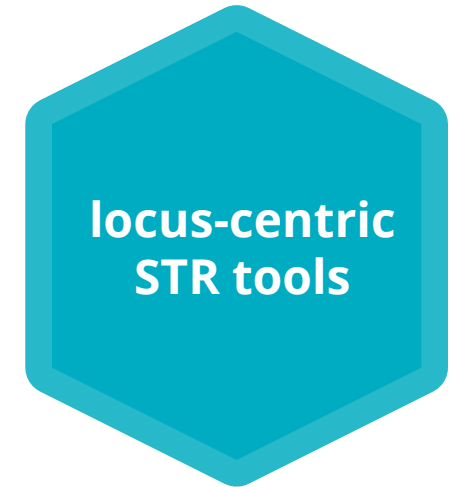

**locus-centric  
STR tools**

- anchor flanking sequences
- extract repeat region
- analyze length & sequence

# Landscape of open-access genotyping tools

|               | Software                                         | Programming language(s) | Platform                        | Input format      | GUI       | Parallel processing | Stutter modelling | Result visualization    | ISFG nomenclature      |
|---------------|--------------------------------------------------|-------------------------|---------------------------------|-------------------|-----------|---------------------|-------------------|-------------------------|------------------------|
| genome-wide   | <b>lobSTR</b><br>(Gymrek et al., 2012)           | C/C++/R                 | <b>Unix</b>                     | FASTA, FASTQ, BAM | <b>no</b> | yes                 | yes               | <b>no</b>               | <b>no</b>              |
|               | <b>RepeatSeq</b><br>(Highnam et al., 2013)       | C++/Python              | <b>Unix</b>                     | BAM               | <b>no</b> | yes                 | yes               | <b>no</b>               | <b>no</b>              |
|               | <b>STR Viper</b><br>(Cao et al., 2013)           | Java                    | any                             | BAM, SAM          | <b>no</b> | no                  | <b>no</b>         | <b>no</b>               | <b>no</b>              |
| locus-centric | <b>STRait Razor v3</b><br>(Woerner et al., 2017) | C++                     | Windows, Unix                   | FASTQ             | <b>no</b> | yes                 | <b>no</b>         | yes<br>(Excel workbook) | yes<br>(known alleles) |
|               | <b>MyFLq</b><br>(Van Neste et al., 2015)         | Python                  | Web, Docker, Illumina BaseSpace | FASTA, FASTQ      | yes       | yes                 | <b>no</b>         | yes                     | <b>no</b>              |
|               | <b>FDSTools</b><br>(Hoogenboom et al., 2017)     | Python                  | <b>Unix</b>                     | FASTA             | <b>no</b> | no                  | yes               | yes                     | <b>no</b>              |
|               | <b>STRinNGS</b><br>(Friis et al., 2016)          | Python/R                | <b>Unix</b>                     | FASTQ, BAM        | <b>no</b> | no                  | <b>no</b>         | yes                     | <b>no</b>              |
|               | <b>SEQ Mapper</b><br>(Lee et al., 2016)          | .NET                    | Windows, Web                    | FASTA, FASTQ      | yes       | no                  | <b>no</b>         | <b>no</b>               | <b>no</b>              |
|               | <b>Altius</b><br>(Bailey et al., 2017)           | Python                  | Web                             | FASTQ             | yes       | yes                 | <b>no</b>         | yes                     | yes                    |
|               | <b>toaSTR</b><br>(Ganschow et al., 2018)         | Perl                    | Web                             | FASTA, FASTQ      | yes       | yes                 | yes               | yes                     | yes                    |



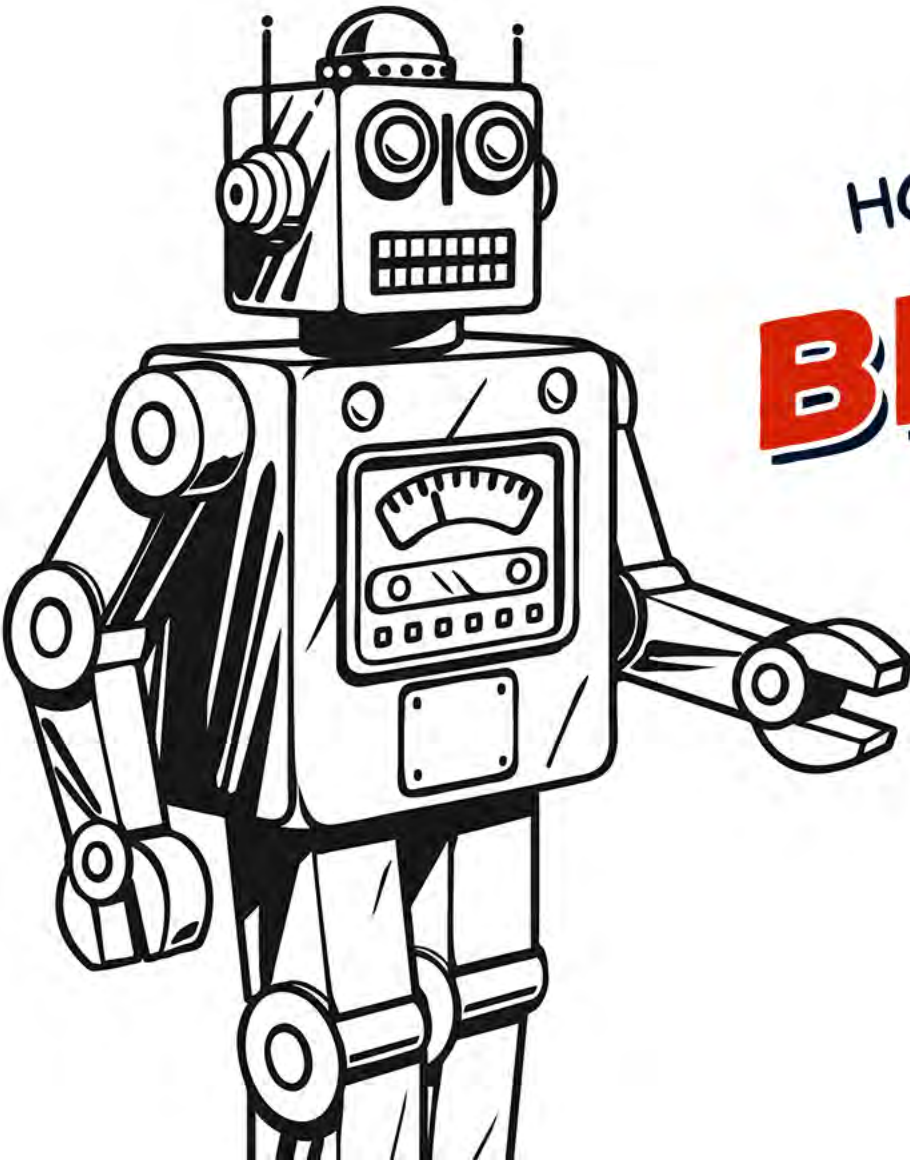

HOW CAN WE MAKE  
**BIOINFORMATICS**  
*easy?*

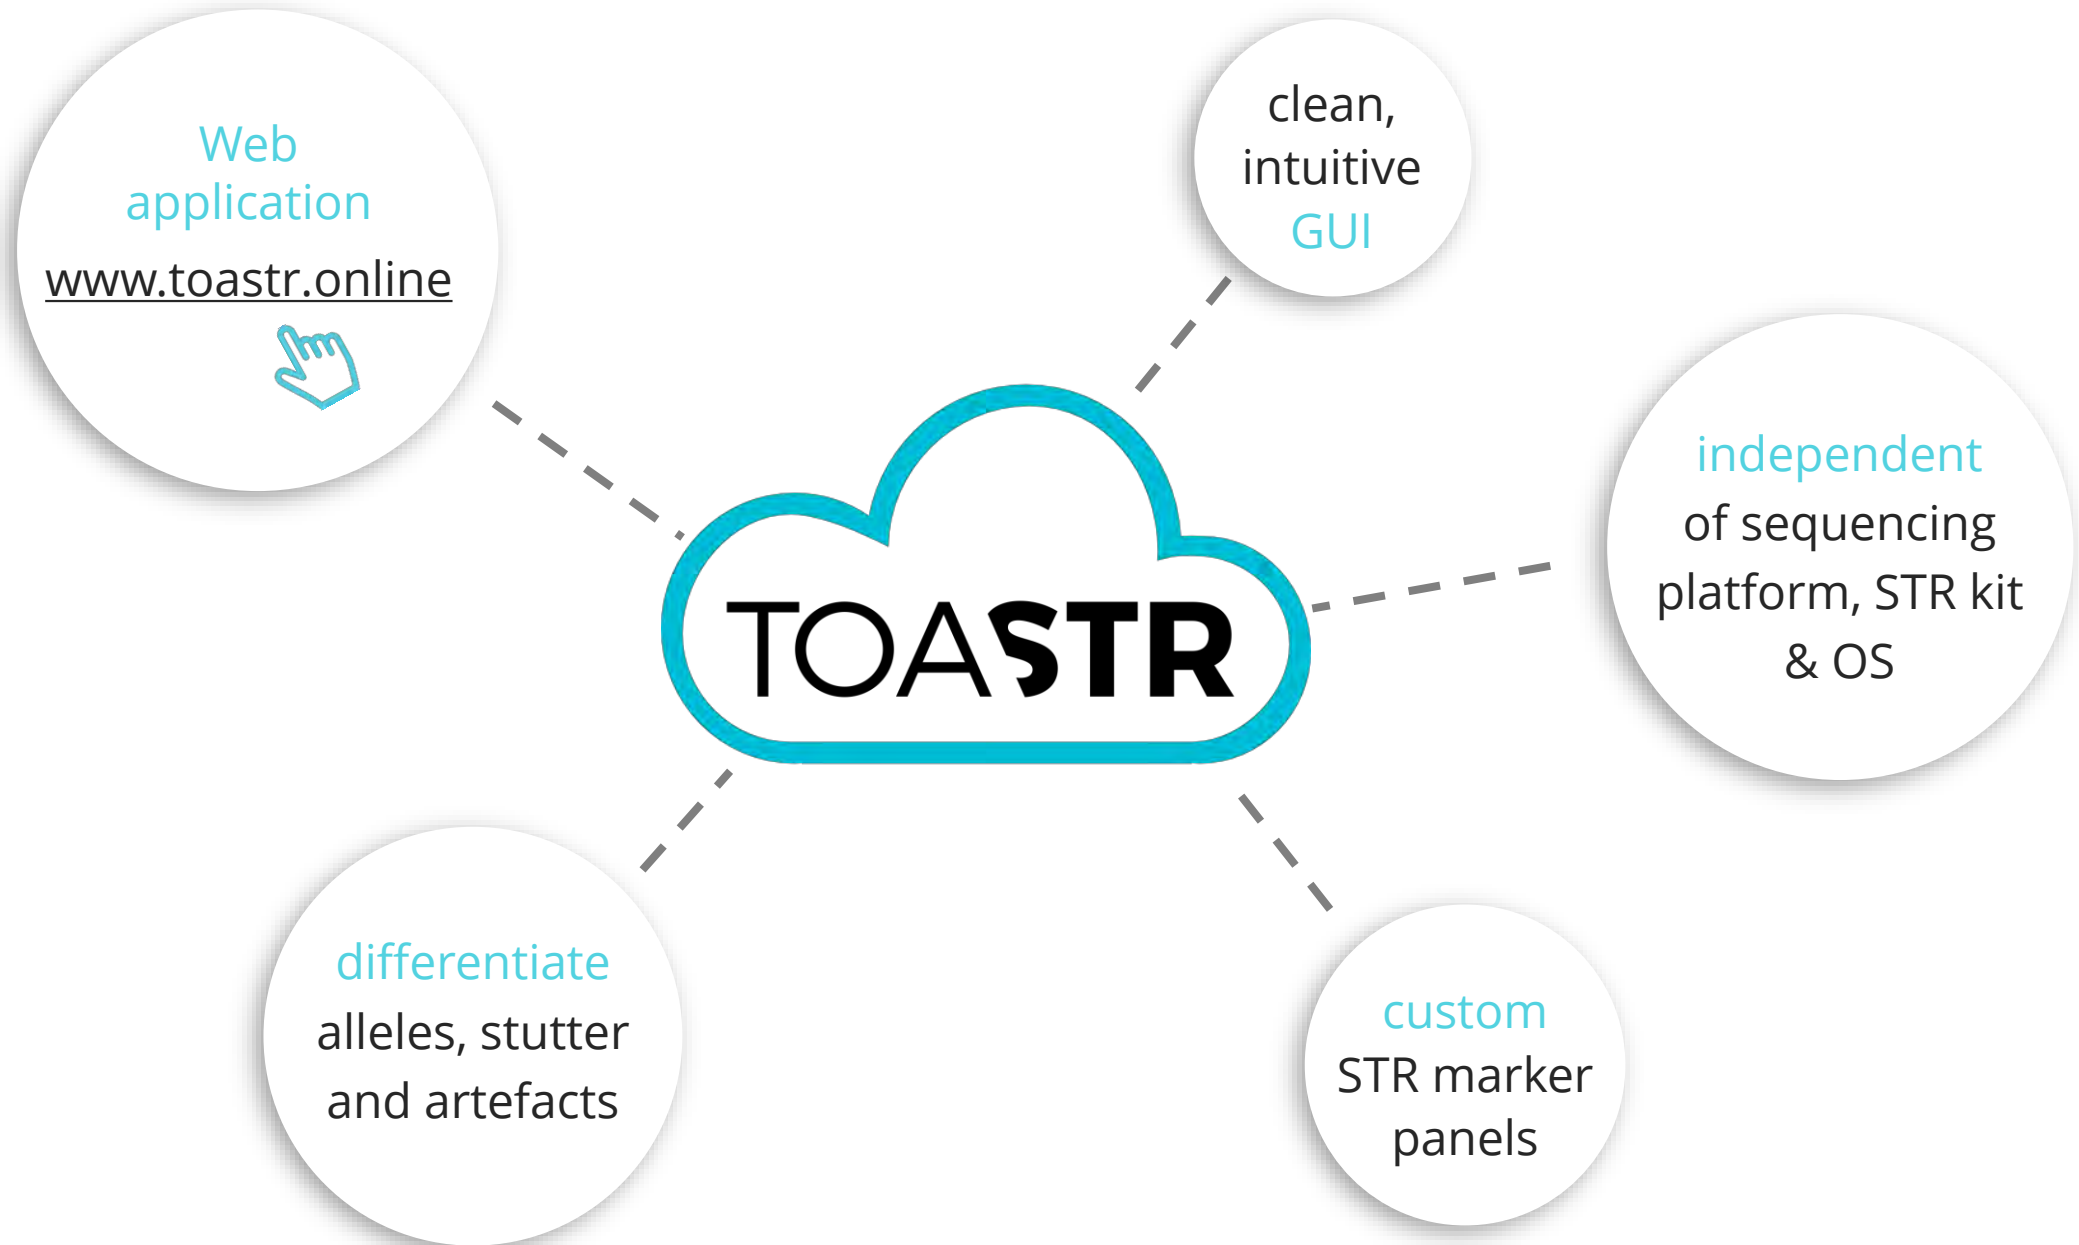

# toaSTR algorithm

1

CALLING

2

CLUSTERING

3

FORMATTING

4

MODELLING

>Seq\_1

```
GTGGTGTGTATTCCCTGTGCCTTTGGGGTTTTCTGTCGTTACACGCATCTCCTTTTTGGCTGTGCCTTTGGGGGCATCTCTTATACTCATGAAATC
AACAGAGGCTTGCATGTATCTGTCTGTCTGTCTGTCTGTCTATCTATCTATCTATCTATCTATCTATCTATCTATCTATCTATCTATCTATCTATCTATCTAGAGACTTTGTCTTTCCTCTG
TCTCCCCTCTTTTACTTCCGTTTTCTGTCGTTACACTTCTCTTCTCCTTTTTCTGTCGTTACACTTTTTCTGTCGTTACATTATTCCCTGTGCCT
```

>Seq\_2

```
GTGGTGTGTATTCCCTGTGCCTTTGGGGTTTTCTGTCGTTACACGCATCTCCTTTTTGGCTGTGCCTTTGGGGGCATCTCTTATACTCATGAAATC
AACAGAGGCTTGCATGTATCTGTCTGTCTGTCTGTCTGTCTATCTATCTATCTATCTATCTATCTATCTATCTATCTATCTATCTATCTATCTATCTATCTATCTAGAGACTTTGTCTTTCCTCTG
CTTTTACTTCCGTTTTCTGTCGTTACACTTCTCTTCTCCTTTTTCTGTCGTTACACTTTTTCTGTCGTTACATTATTCCCTGTGCCT
```

recognition elements

# toaSTR algorithm

1

CALLING

2

CLUSTERING

3

FORMATTING

4

MODELLING

GAGGCTTGCATGTA TCTGTCTGTCTGTCTGTCTGTCTGTCTATCTATCTATCTATCTATCTATCTATCTATCTATCTATCTATGAGACTTTGTCTTTC  
GAGGCTTGCATGTA TCTGTCTGTCTGTCTGTCTGTCTGTCTATCTATCTATCTATCTATCTATCTATCTATCTATCTATCTATCTATGAGACTTTGTCTTTC  
GAGGCTTGCATGTA TCTGTCTGTCTGTCTGTCTGTCTGTCTATCTATCTATCTATCTATCTATCTATCTATCTATCTATCTATCTATGAGACTTTGTCTTTC

5000x **TCTGTCTGTCTGTCTGTCTGTCTGTCTATCTATCTATCTATCTATCTATCTATCTATCTATCTATCTATCTATCTA**

GAGGCTTGCATGTA TCTGTCTGTCTGTCTGTCTGTCTGTCTATCTATCTATCTATCTATCTATCTATCTATCTATCTATCTATGAGACTTTGTCTTTC  
GAGGCTTGCATGTA TCTGTCTGTCTGTCTGTCTGTCTGTCTATCTATCTATCTATCTATCTATCTATCTATCTATCTATCTATGAGACTTTGTCTTTC  
GAGGCTTGCATGTA TCTGTCTGTCTGTCTGTCTGTCTGTCTATCTATCTATCTATCTATCTATCTATCTATCTATCTATCTATGAGACTTTGTCTTTC

3000x **TCTGTCTGTCTGTCTGTCTGTCTGTCTATCTATCTATCTATCTATCTATCTATCTATCTATCTA**

→ Observations

# toaSTR algorithm

1

CALLING

2

CLUSTERING

3

FORMATTING

4

MODELLING

| CE | Coverage | Sequence                                    |
|----|----------|---------------------------------------------|
| 12 | 5000x    | [TCTG] <sub>4</sub> TCA [TCTA] <sub>8</sub> |
| 10 | 3000x    | [TCTG] <sub>4</sub> TCA [TCTA] <sub>6</sub> |

# toaSTR algorithm

1

CALLING

2

CLUSTERING

3

FORMATTING

4

MODELLING

- Classification of observations: alleles, stutter, artefact
- Sequence-based stutter prediction
- Assumption: stutter occurs most likely in the LUS and SLUS

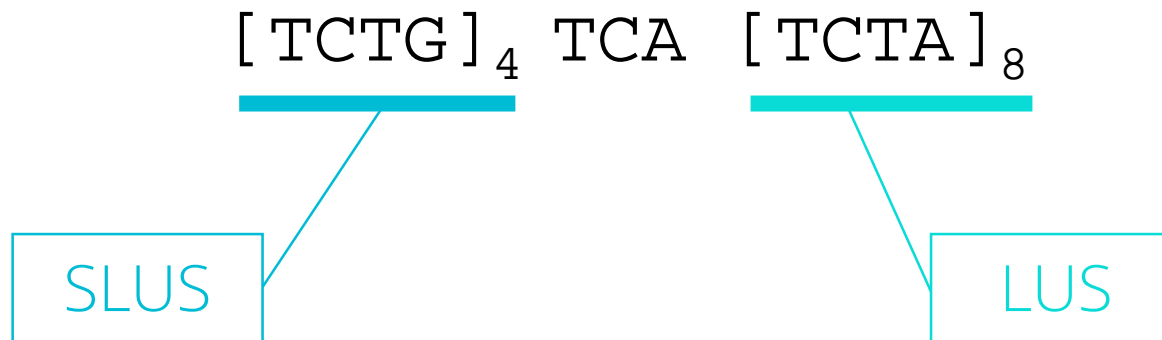



# Stutter model

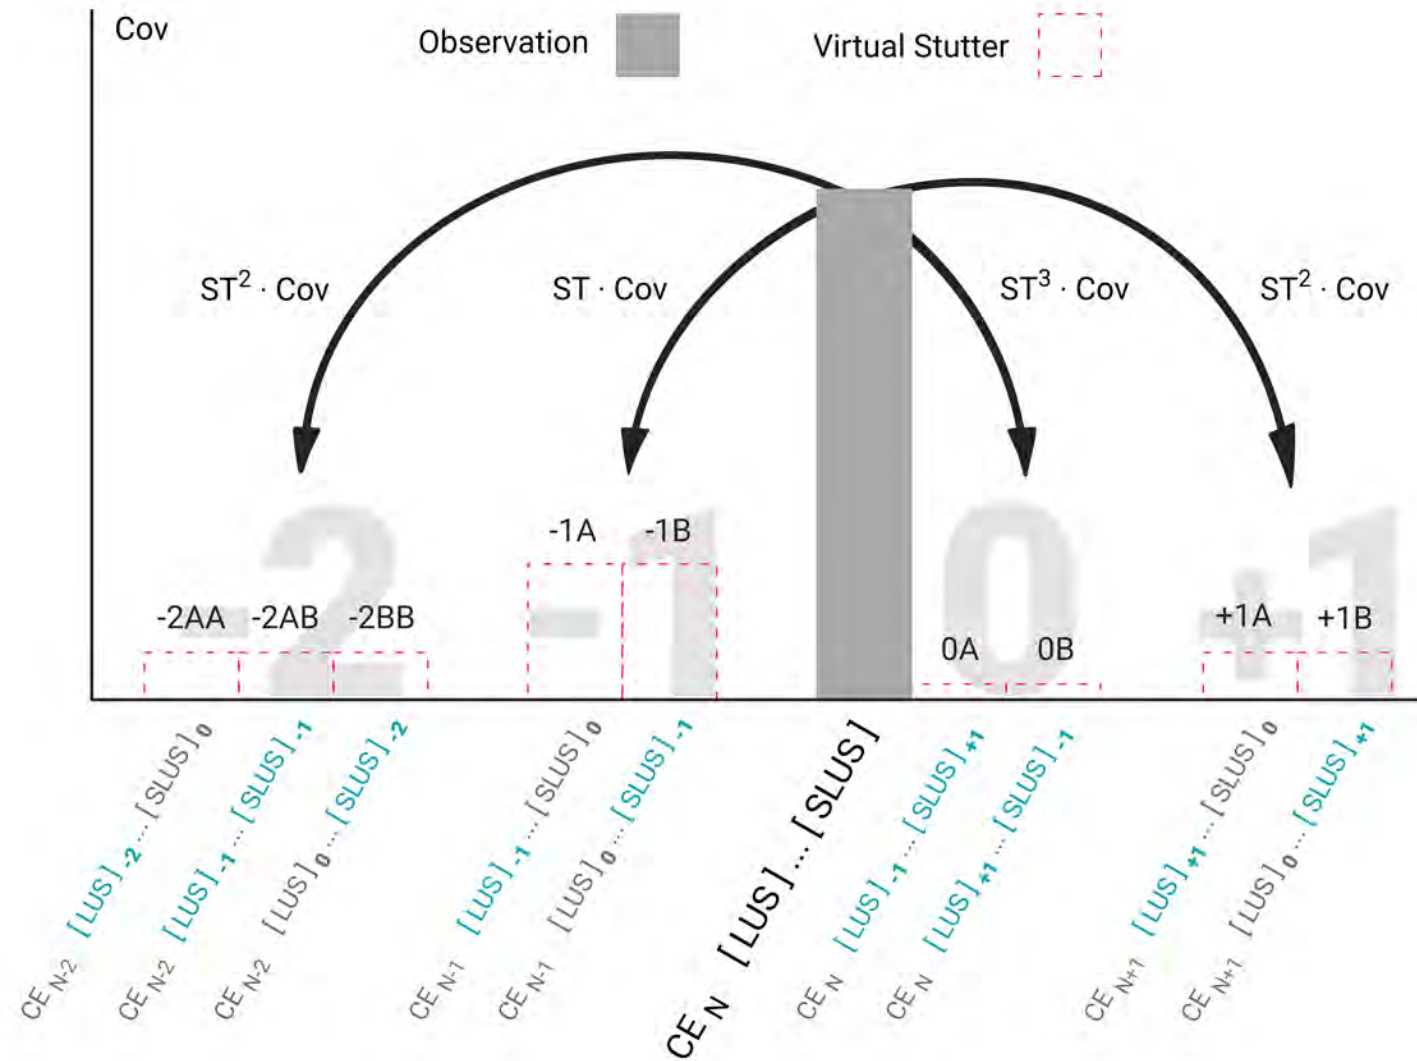

# Classification

Stutter modelling enables automatic classification of observations:

1. Calling of observations

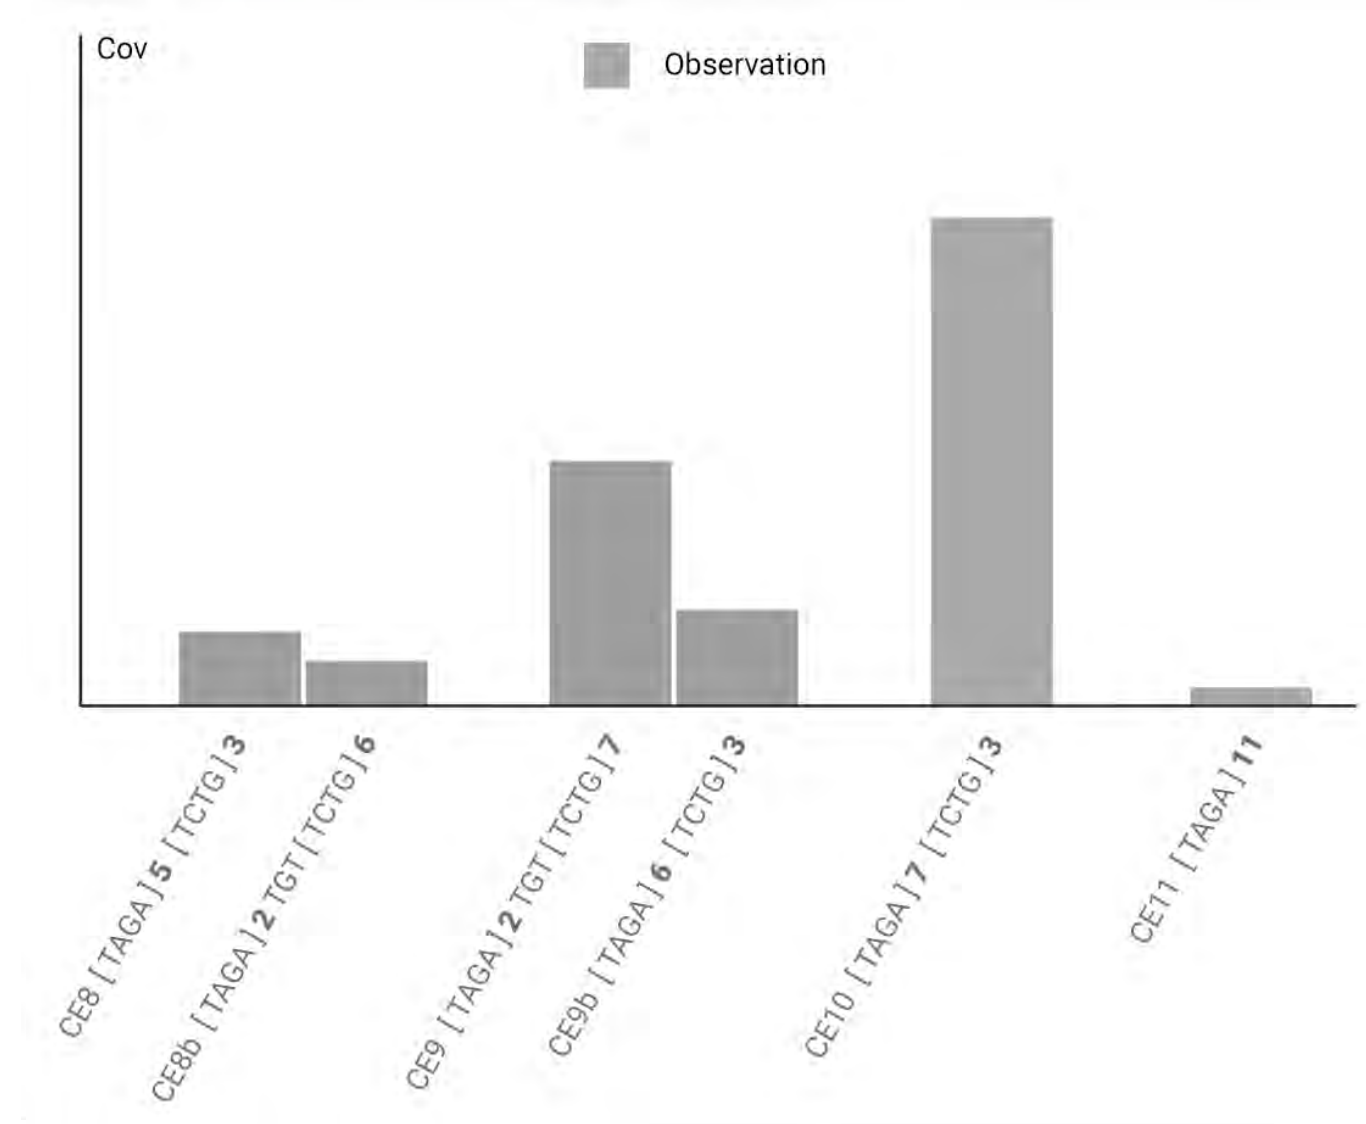

# Classification

Stutter modelling enables automatic classification of observations:

1. Calling of observations
2. Calculation of Virtual Stutter

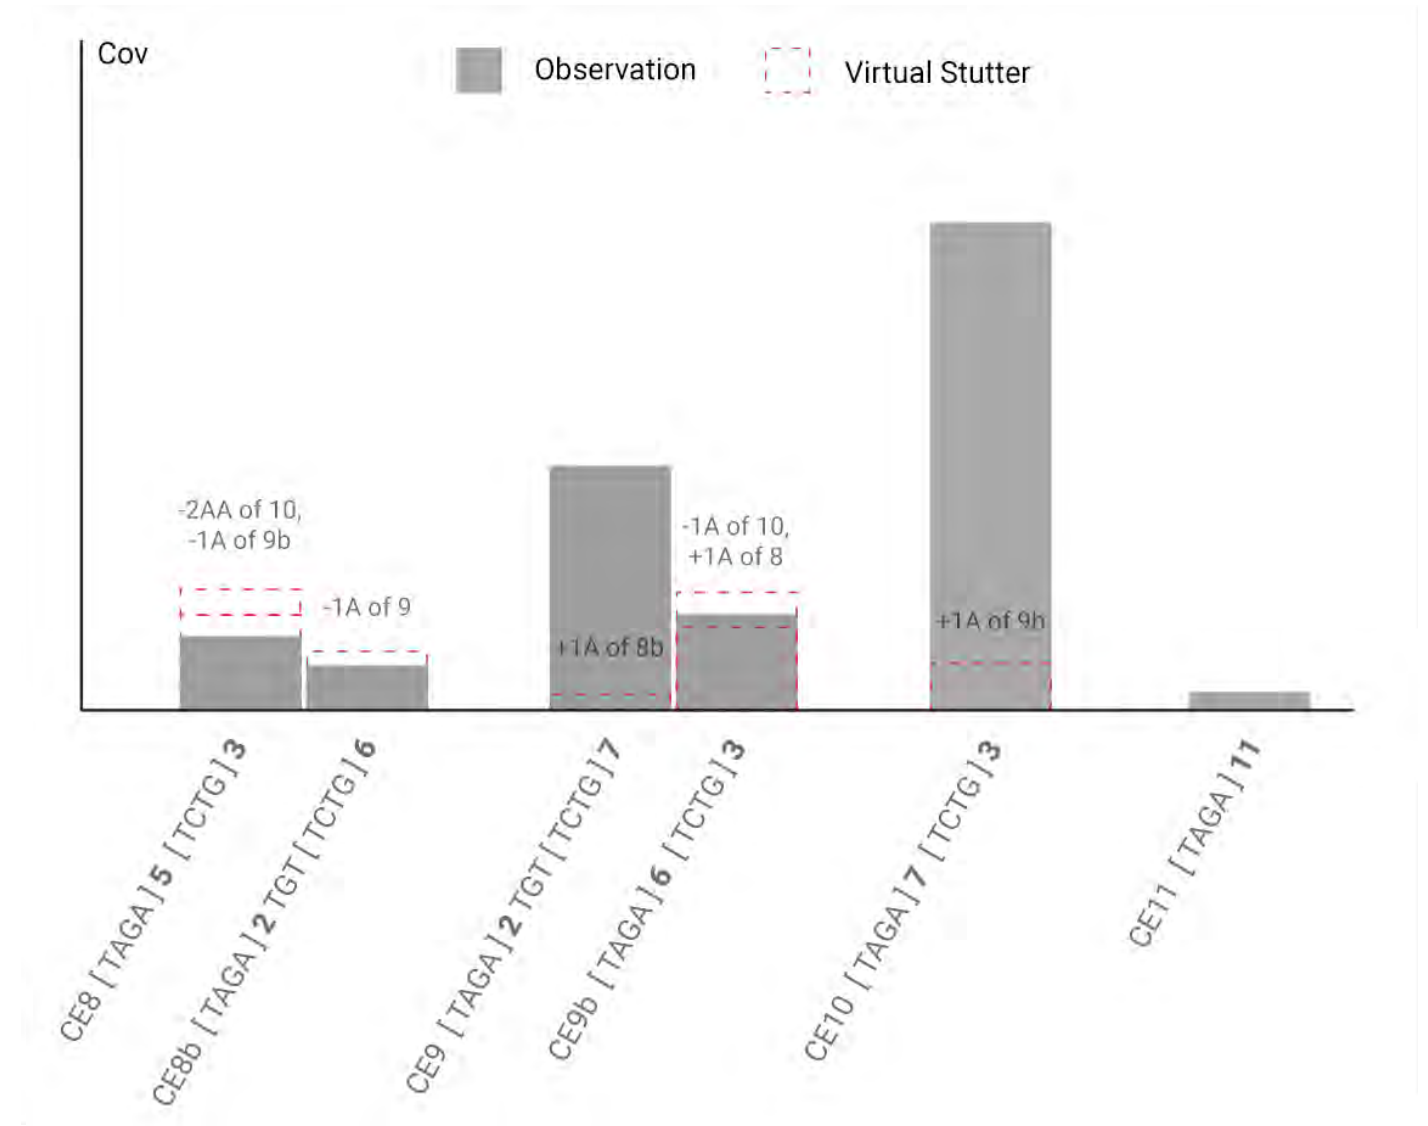

# Classification

Stutter modelling enables automatic classification of observations:

1. Calling of observations
2. Calculation of Virtual Stutter
3. Classification

→ Supports the interpretation of mixed samples

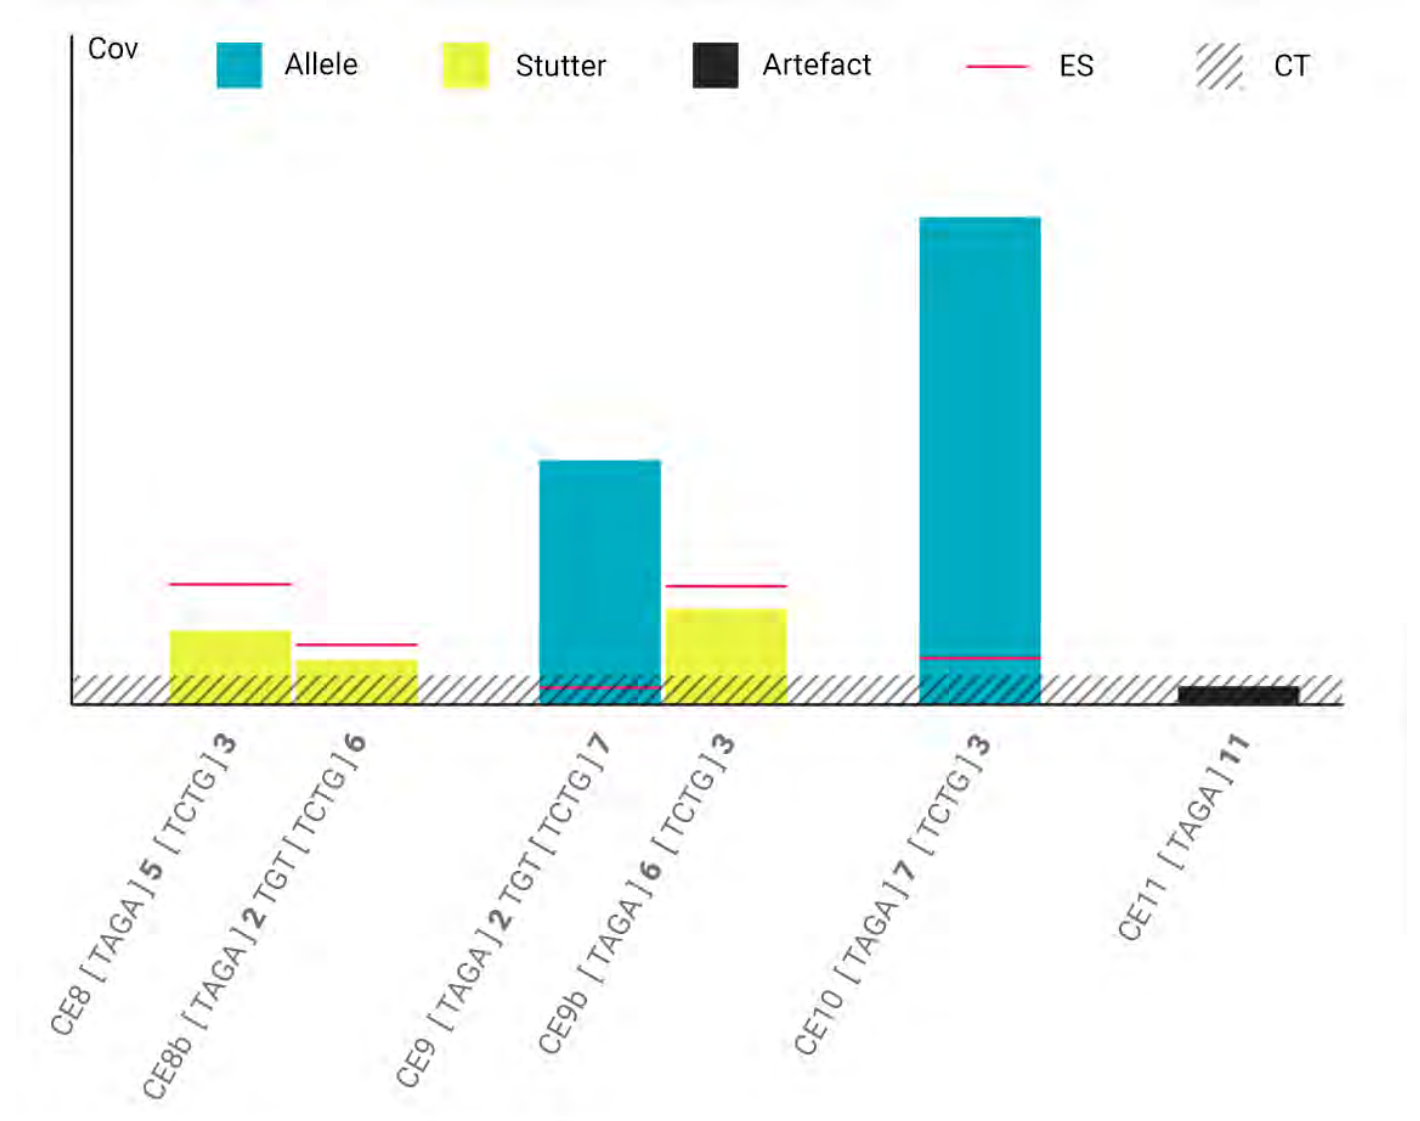

## Dashboard

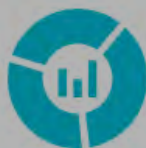

### Analyses

Start a new analysis, list finished and running analyses, show and edit results

GO

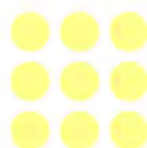

### Panels

Create and view custom collections of STR markers and define stutter thresholds

VIEW

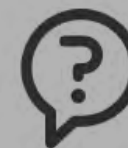

### Manual

Read the comprehensive documentation of toaSTR features and algorithms

READ

---

## Changelog

All notable changes to this project will be documented in this log.

The format is based on [Keep a Changelog](#) and this project adheres to [Semantic Versioning](#).

The  icon indicates important changes that may affect your results.

**1.0.0-beta.12 (2017-10-23)**

# Panels / **New Panel**

[← back to panels](#)

Panel Name

0/30

▼ Autosomal

D1S1656  %

D2S1338  %

D2S441  %

TPOX  %

D3S1358  %

FGA  %

CSF1PO  %

D5S818  %

D6S1043  %

SE33  %

D7S820  %

D8S1179  %

D10S1248  %

TH01  %

D12S391  %

VWA  %

D13S317  %

PENTA E  %

D16S539  %

D18S51  %



# Panels / **New Panel**

Panel Name

21-plex in-house

Autosomal

D1S1656 15 %

D2S1338 20 %

D3S1358 %

FGA %

D6S1043 %

SE33 %

D10S1248 %

TH01 %

D13S317 %

PENTA E %

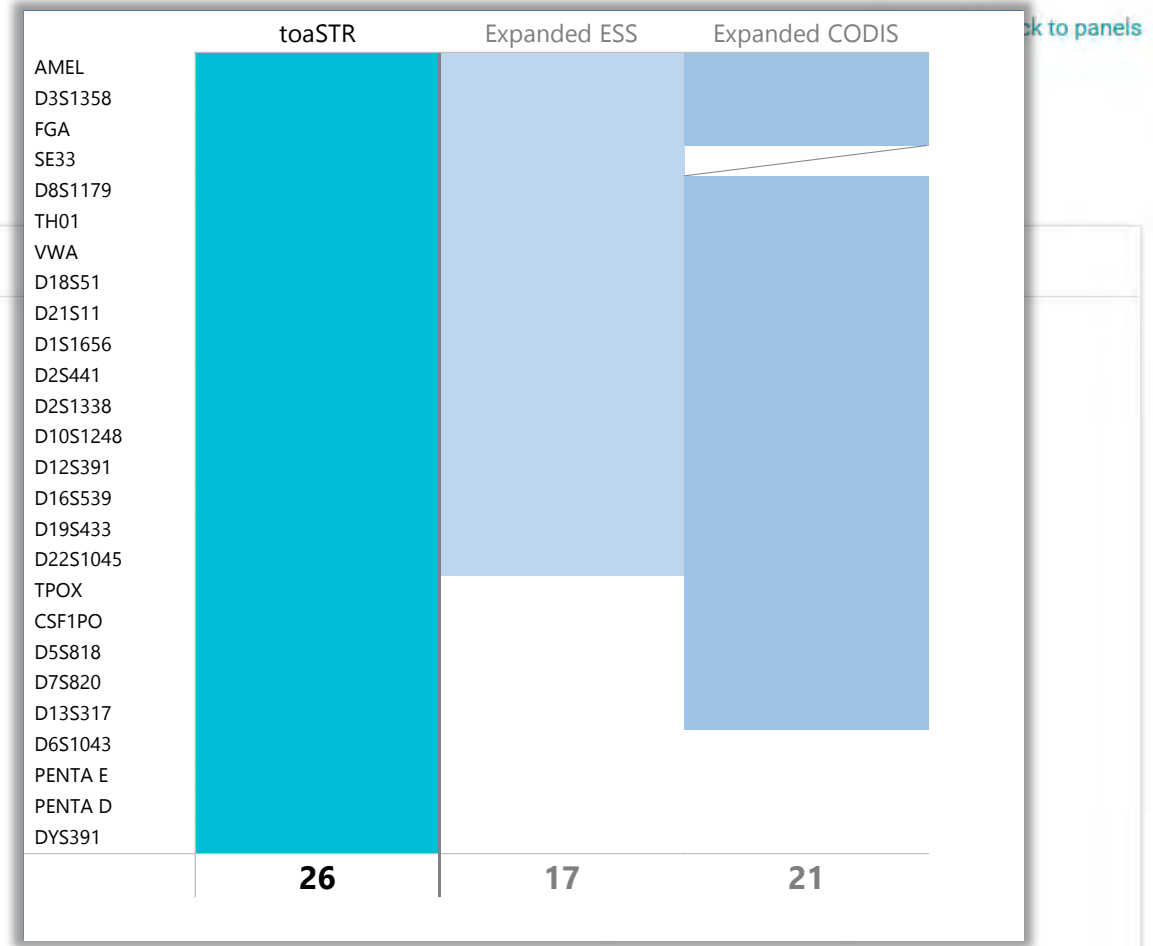

[Link to panels](#)

FEEDBACK

D16S539 %

D18S51 %

## Dashboard

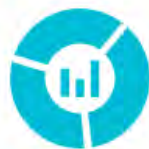

### Analyses

Start a new analysis, list finished and running analyses, show and edit results

GO

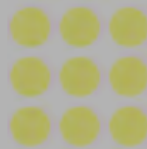

### Panels

Create and view custom collections of STR markers and define stutter thresholds

VIEW

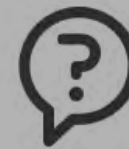

### Manual

Read the comprehensive documentation of toaSTR features and algorithms

READ

---

## Changelog

All notable changes to this project will be documented in this log.

The format is based on [Keep a Changelog](#) and this project adheres to [Semantic Versioning](#).

The  icon indicates important changes that may affect your results.

**1.0.0-beta.12 (2017-10-23)**

## Analyses / **New Analysis**

Name ⓘ

---

Notes ⓘ

---

Sample type ⓘ

Blood

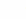

Constellation ⓘ

This is a single person sample [reference]

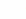

Panel ⓘ

- Promega PowerSeq
- Illumina ForenSeq
- Thermo Early Access
- 21-plex in-house

## Analyses / **New Analysis**

Name ⓘ

2800M

---

Notes ⓘ

Reference DNA

---

Sample type ⓘ

Unknown ▼

---

Constellation ⓘ

This is a single person sample [reference] ▼

---

Panel ⓘ

- Promega PowerSeq
- Illumina ForenSeq
- Thermo Early Access
- 21-plex in-house

Unknown

---

Constellation ⓘ

This is a single person sample [reference]

---

Panel ⓘ

- Promega PowerSeq
- Illumina ForenSeq
- Thermo Early Access
- 21-plex in-house

Analytical Threshold ⓘ

10 reads (default)

---

Calling Threshold ⓘ

2 % (default)

---

DATA FILE

---

Please refer to the manual for input recommendations.  
Maximum file size 500MB. Supported formats:  
FASTA (\*.fasta, \*.fa, \*.fa.gz), FASTQ (\*.fastq, \*.fq, \*.fq.gz)

START

INPUT READS ⓘ

250000

CALLED READS ⓘ

71568 (28%)

## Quick edit

NAME

2800M

SAMPLE TYPE

Blood ▼

CONSTELLATION

This is a single person sample [ref]

NOTES

SAVE

## Analyses / 2800M

 ANALYTICAL THRESHOLD 10 reads CALLING THRESHOLD 2%

## Summary

 EXPORT

## Promega PowerSeq Auto

| SYSTEM   | COVERAGE | ALLELES |
|----------|----------|---------|
| D1S1656  | 4031     | 12 13   |
| D2S1338  | 3049     | 22 25   |
| D2S441   | 3220     | 10 14   |
| TPOX     | 3584     | 11      |
| D3S1358  | 2992     | 17 18   |
| FGA      | 2511     | 20 23   |
| CSF1PO   | 3662     | 12      |
| D5S818   | 2982     | 12      |
| D7S820   | 2514     | 8 11    |
| D8S1179  | 3419     | 14 15   |
| D10S1248 | 3044     | 13 15   |
| TH01     | 3382     | 6 9.3   |
| D12S391  | 3330     | 18 23   |
| VWA      | 2195     | 16 19   |
| D13S317  | 2396     | 9 11    |



INPUT READS ⓘ

250000

CALLED READS ⓘ

71568 (28%)

Quick edit

NAME  
2800M

SAMPLE TYPE

Blood ▼

CONSTELLATION

This is a single person sample [ref]

NOTES

SAVE

Made with toastR  
v1.0.0-beta.14

@LABCON-OWL GmbH

Research use only.  
Not for commercial use.

D2S441

Called reads 3228  
Stutter threshold 15 %

Results

| CE  | St | Cov  | ES  | Seq                                                                    | Source                 |
|-----|----|------|-----|------------------------------------------------------------------------|------------------------|
| 9   | S  | 95   | 220 | D2S441[CE9]-Chr02-GRCh38 68011947-68011994 [TCTA]9                     | -1A of 10, -2AA of 11, |
| 10  | A  | 1457 | 9   | D2S441[CE10]-Chr02-GRCh38 68011947-68011994 [TCTA]10                   | +1A of 9, -1A of 11,   |
| 11  | X  | 46   | 33  | D2S441[CE11]-Chr02-GRCh38 68011947-68011994 [TCTA]11                   | +1A of 10,             |
| 13  | S  | 58   | 227 | D2S441[CE13]-Chr02-GRCh38 68011947-68011994 [TCTA]10 TTTA [TCTA]2      | -1A of 14, -2AA of 15, |
| 14  | A  | 1506 | 6   | D2S441[CE14]-Chr02-GRCh38 68011947-68011994 [TCTA]11 TTTA [TCTA]2      | +1A of 13, -1A of 15,  |
| 14b | X  | 32   | 0   | D2S441[CE14]-Chr02-GRCh38 68011947-68011994 [TCTA]10 TTTA TTTA [TCTA]2 |                        |
| 15  | X  | 34   | 34  | D2S441[CE15]-Chr02-GRCh38 68011947-68011994 [TCTA]12 TTTA [TCTA]2      | +1A of 14,             |

CE = Capillary electrophoresis name, St = Status, A = Allele, S = Stutter, X = Artefact, (A) = manually excluded, Cov = Coverage, ES = Expected Stutter value, Seq = Comprehensive sequence name.

2800M

Page 4 of 25

EXPORT

D12S391

3330

18 23

VWA

2195

16 19

D13S317

2396

9 11

ALLED READS ⓘ

3330

STUTTER THRESHOLD ⓘ

25 %

AUTOSDMAL

- D1S1656
- D2S1338
- D2S441
- TPOX
- D3S1358
- FGA
- CSF1PO
- D5S818
- D7S820
- D8S1179
- D10S1248
- TH01
- D12S391
- VWA
- D13S317
- PENTA E
- D16S539
- D18S51
- D19S433

## 2800M / D12S391

ANALYTICAL THRESHOLD 10 reads

CALLING THRESHOLD 2 % (66 reads)

### Electropherogram ⓘ

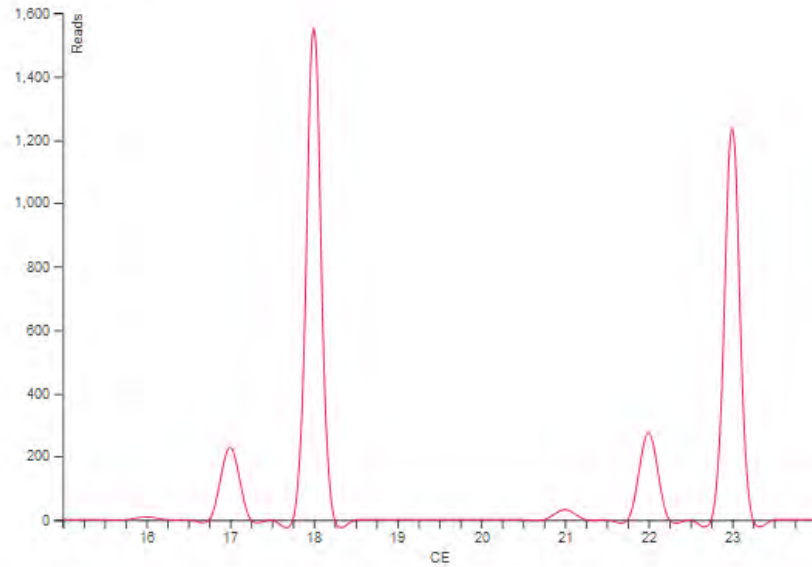

### Histogram ⓘ

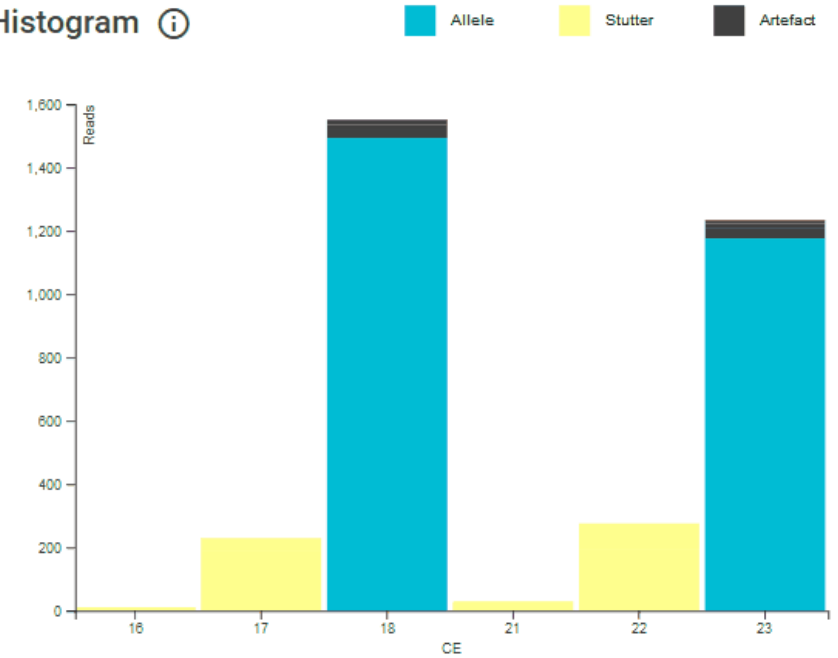

Show alleles
  Show stutter
  Show artefacts
  Show source

| REPORTED | CE | STATUS  | COVERAGE | EXPECTED STUTTER | SEQUENCE                    |
|----------|----|---------|----------|------------------|-----------------------------|
|          | 16 | Stutter | 11       | 141              | [AGAT]9 [AGAC]6 [AGAT]1     |
|          | 17 | Stutter | 191      | 275              | [AGAT]110 [AGAC]16 [AGAT]11 |

## Dashboard



### Analyses

Start a new analysis, list finished and running analyses, show and edit results

GO

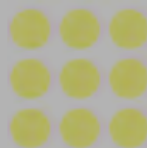

### Panels

Create and view custom collections of STR markers and define stutter thresholds

VIEW

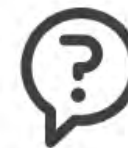

### Manual

Read the comprehensive documentation of toaSTR features and algorithms

READ

---

## Changelog

All notable changes to this project will be documented in this log.

The format is based on [Keep a Changelog](#) and this project adheres to [Semantic Versioning](#).

The  icon indicates important changes that may affect your results.

**1.0.0-beta.12 (2017-10-23)**

## Content

### Introduction

Workflow recommendations

toaSTR algorithm

Stutter modelling

Classification of alleles, stutter and artefacts

Arranging a marker panel

Overview of analyses

Starting a new analysis

Reading the result report

Exporting results

FAQ

# Documentation

## Introduction

In recent studies, massively parallel sequencing (MPS) has demonstrated its potential for the forensic analysis of short tandem repeats (STRs). In addition to nominal allele lengths, MPS can discover sequence variation in isoalleles (alleles that are identical by the number of repeats) and thus increase discriminatory power over conventional capillary electrophoresis (CE). However, considering currently available software, data analysis with routine use in mind turns out to be a cumbersome process, especially for laboratories with limited bioinformatical expertise.

We developed the web application toaSTR, a user-friendly tool for STR allele calling in MPS data independent of the instrument platform or the forensic kit used. toaSTR comes up with a clean, intuitive graphical user interface and well-documented parameter settings. Users have the ability to select from a wide range of STR markers to [configure custom marker panels](#). This software supports both commercial and in-house multiplex PCR kits and various library preparation chemistries. Its sequence-based [stutter-modelling algorithm](#) automatically differentiates [biological \(iso-\)alleles from stutter and artefacts](#) to assist the interpretation of mixed samples.

toaSTR features a comprehensive [data visualization](#) with interactive diagrams and an adjustable tabular overview of sequence observations. Results are concordant with CE-based fragment analysis and can be [exported](#) for further analysis in biostatistical software or as an archivable/printable PDF document with sequence description in the ISFG-recommended nomenclature.

### Citation:

Ganschow S, Wiegand P, Tiemann C (2017) toaSTR: A web-based forensic tool for the analysis of short tandem repeats in massively parallel sequencing data. <http://dx.doi.org/10.1016/j.fsigs.2017.09.034>

[▲ top](#)

## Workflow recommendations

A common MPS genotyping workflow involves a multiplex PCR amplification of STR targets followed by library

# Usage statistics

>60

registered users

>2,800

analyses performed



# Future directions

Forensic Science International: Genetics 37 (2018) 21–28

Contents lists available at ScienceDirect

 Forensic Science International: Genetics 

journal homepage: [www.elsevier.com/locate/fsigen](http://www.elsevier.com/locate/fsigen)

toaSTR: A web application for forensic STR genotyping by massively parallel sequencing 

Sebastian Ganschow<sup>a,\*</sup>, Janine Silvery<sup>a</sup>, Jörn Kalinowski<sup>b</sup>, Carsten Tiemann<sup>a</sup>

<sup>a</sup> LABCON-OWL Analytik, Forschung und Consulting GmbH, Siemensstr. 40, 32105 Bad Salzungen, Germany  
<sup>b</sup> Center for Biotechnology (CeBITec), Bielefeld University, Sequenz 1, 33615 Bielefeld, Germany

- Refine the stutter model
- Capture flanking variation
- Interact with databases (e.g. NOMAUT)



# Acknowledgement

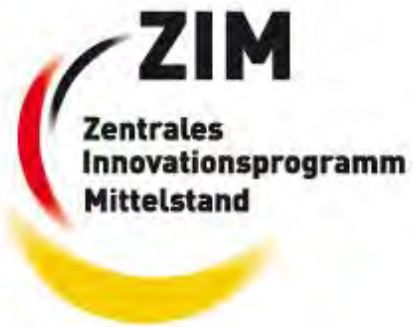

Supported by:

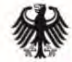

Federal Ministry  
for Economic Affairs  
and Energy

on the basis of a decision  
by the German Bundestag

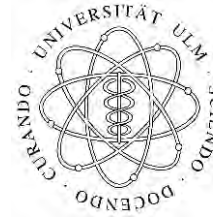

**Ulm University Hospital**  
Institute for legal medicine  
Division forensic genetics

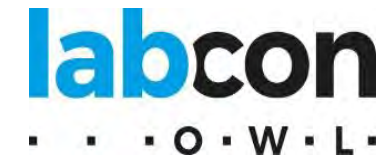

**LABCON-OWL**  
Analytik, Forschung und Consulting GmbH  
Bad Salzuflen

# Points of discussion

---

- Comprehensive **benchmarking** of MPS-STR genotyping tools on standardized data sets
- Standardization of **anchor** sequences (impacts the allelic detection capability):
  - locus specificity (mismatch tolerance)
  - kit compatibility
  - CE concordance
- Guideline for **quality control** of raw sequencing data
  - Quality filtering or quality trimming
  - How to measure quality? Which QC tools and quality thresholds?
  - Implement QM in genotyping software?
- Sequencing mode: single-end, paired-end, **merging** of paired end reads

# STR Databasing and Quality control

## STRidER

shortened version for circulation

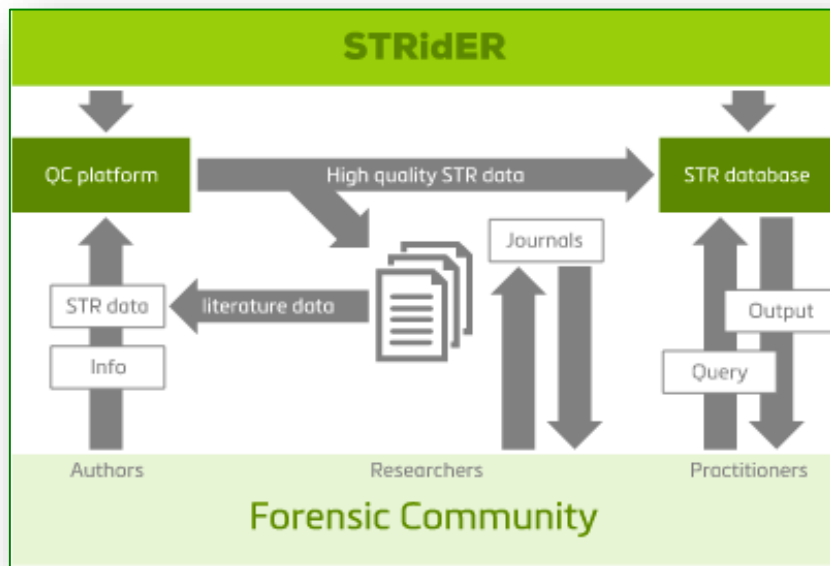

| DBS1179 |           |           |                        |                |           |           |           |         |
|---------|-----------|-----------|------------------------|----------------|-----------|-----------|-----------|---------|
| Allele  | AUSTRIA   | BELGIUM   | BOSNIA AND HERZEGOWINA | CZECH REPUBLIC | DENMARK   | FINLAND   | FRANCE    | GERMANY |
|         | 222       | 206       | 171                    | 200            | 200       | 230       | 208       |         |
| 8       | 1.8018e-2 | 7.2816e-3 | 5.8480e-3              | 7.5000e-3      | 1.5000e-2 | 1.7391e-2 | 2.4039e-2 | 1.2840  |
| 9       | 1.8018e-2 | 1.2136e-2 | 8.7719e-3              | 5.0000e-3      | 1.0000e-2 | 8.6956e-3 | 9.6154e-3 | 1.2840  |
| 10      | 9.4595e-2 | 8.7379e-2 | 5.8479e-2              | 5.5000e-2      | 9.7500e-2 | 8.2609e-2 | 8.4135e-2 | 8.7613  |
| 11      | 1.0135e-1 | 9.7087e-2 | 3.2164e-2              | 1.0000e-1      | 8.0000e-2 | 1.3261e-1 | 8.8942e-2 | 7.7795  |
| 12      | 1.6216e-1 | 1.5049e-1 | 1.8713e-1              | 1.5250e-1      | 1.3000e-1 | 1.3261e-1 | 1.3462e-1 | 1.4199  |
| 13      | 2.9054e-1 | 3.1311e-1 | 3.4210e-1              | 3.5000e-1      | 3.4500e-1 | 3.5217e-1 | 3.1490e-1 | 3.1269  |
| 14      | 1.9144e-1 | 1.6990e-1 | 2.1637e-1              | 2.1250e-1      | 2.0750e-1 | 1.8478e-1 | 2.0433e-1 | 1.9864  |
| 15      | 1.0360e-1 | 1.2379e-1 | 1.1403e-1              | 9.7500e-2      | 8.5000e-2 | 5.6522e-2 | 1.0336e-1 | 1.1933  |
| 16      | 1.8018e-2 | 3.3981e-2 | 3.2164e-2              | 2.0000e-2      | 2.0000e-2 | 1.5217e-2 | 3.6058e-2 | 3.0211  |
| 17      | 2.2522e-3 | 4.8544e-3 | 2.9240e-3              |                | 5.0000e-3 | 1.0870e-2 |           | 6.0423  |

Martin Bodner, Walther Parson

STRAND WG meeting, London, 12 April 2019

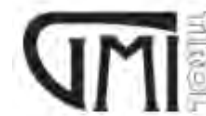

# Outline of presentation

1. (short) history of activities
2. **STRidER** and quality control
3. related activities

# Early database considerations

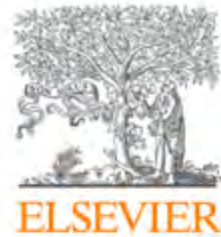

Forensic Science International

Volume 131, Issues 2–3, 28 January 2003, Pages 184–196

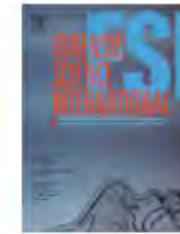

A comparison of adjustment methods to test the robustness of an STR DNA database comprised of 24 European populations

Peter Gill <sup>a</sup>, Lindsey Foreman <sup>b</sup>, John S Buckleton <sup>c</sup>, Christopher M Triggs <sup>d</sup>, Heather Allen <sup>a</sup>

An aim of the European Network of Forensic Science Institutes (**ENFSI**) is to produce a **DNA database of second generation multiplex (SGM) STR profiles** that is representative of the resident cosmopolitan populations. To achieve this, data were collected from 24 different populations. All of the data were combined to form one database of 5,700 profiles from which allele proportions were calculated.

# ENFSI STR database: STRbASE

- established in 2004
- **high quality** autosomal STR database
- **19** European countries, **16** autosomal STR loci
- allele **frequency tables**, also for download and import into other software
- **query function**: single and batch query
- hosted by 



# Carefully enhancing STRbASE

- **STRbASE** became well-established
- **time for update:** more markers, more populations
- **new elements?**

• name changed to **STRidER**

• maintaining the tried-and-tested

STRBase: NIST STR Database

Address <http://www.csl.nist.gov/biotech/strbase/>

Short Tandem Repeat DNA  
Internet DataBase

These data are intended to benefit research and application of short tandem repeat DNA markers to human identity testing. The authors are solely responsible for the information herein. [\[Purpose of Database\]](#)

This database has been accessed **30462** times since 10/02/97. (Counter courtesy [www.digitals.com](http://www.digitals.com) - see [disclaimer](#))

Created by [John M. Butler](#) and [Dennis J. Reeder](#) (NIST Biotechnology Division), with invaluable help from Christian Ruitberg and Michael Tung  
Site creators' curriculum vitae available using links above.

\*Partial support for the design and maintenance of this website is being provided by The National Institute of Justice through the NIST Office of Law Enforcement Stan

- o [STR101: Brief Introduction to STRs](#)
- o [STR Fact Sheets \(observed alleles and PCR product sizes\)](#) **Updated**
- o [Sequence Information \(annotated\)](#) **Updated**
- o [Multiplex STR sets](#) **Updated**
- o [Non-published Variant Allele Reports](#) ♦
- o [FBI/COJIS Core STR Loci](#)
- o [DNA Advisory Board Quality Assurance Standards](#)
- o [NIST Standard Reference Material for PCR-Based Testing](#)
- o [Chromosomal Locations](#)
- o [Mutation Rates for Common Loci](#)

STRBase published in  
Nucleic Acids Research!  
Ruitberg, C.M., Reeder, D.J., Butler, J.M.  
(2001) 29(1): 320-322  
[DOWNLOAD PDF](#)

©2002 Academic Press

# How will **STRidER** be used

**Survey sent out to all ENFSI DNA WG participants (2016)**

**Use of adjustment methods** for genotype probabilities (only complete profiles)

- which formulae to present?
- which are the preferred methods?

**27 labs** returned answers

# Survey on adjustment factors

- vast majority of users **does not use adjustments:**
  - *„not necessary“*
  - calculations using **third party software**
- majority of users prefers to receive **only unadjusted frequencies**
- exception: minor allele frequency **MAF ( $5/2n$ )**
- **data quality is the most important**

## Formulae

### Actual matching probability

|                      |                |
|----------------------|----------------|
| $P_m = 2p_i p_j$     | Heterozygotes  |
| $P_m = p_i^2$        | Homocygotes    |
| $P_m = 2p_i - p_i^2$ | Single alleles |

### Balding & Nichols (1994)

|                                                                                                  |                                |
|--------------------------------------------------------------------------------------------------|--------------------------------|
| $P_m = \frac{2(\Theta + (1 - \Theta)p_i)(\Theta + (1 - \Theta)p_j)}{(1 + \Theta)(1 + 2\Theta)}$  | Balding-Nichols heterozygotes  |
| $P_m = \frac{(2\Theta + (1 - \Theta)p_i)(3\Theta + (1 - \Theta)p_i)}{(1 + \Theta)(1 + 2\Theta)}$ | Balding-Nichols homocygotes    |
| $P_m = \frac{(2\Theta + (1 - \Theta)p_i)(3\Theta + (1 - \Theta)p_i)}{(1 + \Theta)(1 + 2\Theta)}$ | Balding-Nichols single alleles |

### Balding size bias correction (1995)

|                                               |               |
|-----------------------------------------------|---------------|
| $P_m = \frac{2(x_i + 2)(x_j + 2)}{(n + 4)^2}$ | heterozygotes |
| $P_m = \frac{(x_i + 2)^2}{(n + 4)^2}$         | homocygotes   |

### Confidence Intervals (NRC-Report 1996)

|                                                                         |                                    |
|-------------------------------------------------------------------------|------------------------------------|
| $Var(\ln(2p_i p_j)) \approx \frac{p_i + p_j - 4p_i p_j}{2N p_i p_j}$    | Confidence interval heterozygotes  |
| $Var(\ln(2p_i^2)) \approx \frac{2(1 - p_i)}{N p_i}$                     | Confidence interval homocygotes    |
| $Var(\ln(2p_i - p_i^2)) \approx \frac{2(1 - p_i)^3}{N p_i (2 - p_i)^2}$ | Confidence interval single alleles |
| $\Gamma = \sqrt{V_1 + V_2 + \dots + V_k}$                               |                                    |
| $Upper\ bound = \log^{-1}(\log_{10}(P_m)) + 1.96\Gamma$                 |                                    |

## Formulae

### Actual matching probability

|                      |                |
|----------------------|----------------|
| $P_m = 2p_i p_j$     | Heterozygotes  |
| $P_m = p_i^2$        | Homocygotes    |
| $P_m = 2p_i - p_i^2$ | Single alleles |

# Data quality is crucial

- high quality data is the most important feature of **STRidER**
- quality control is necessary towards better STR population data
- assistance to authors, reviewers and editors
- enormous experience at  from 



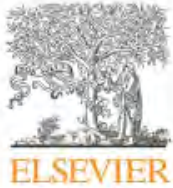

Contents lists available at ScienceDirect

Forensic Science International: Genetics

journal homepage: [www.elsevier.com/locate/fsig](http://www.elsevier.com/locate/fsig)

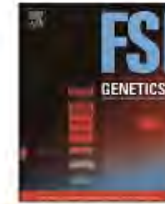

**observations indicating  
the need for STR data QC**

## Inspecting close maternal relatedness: Towards better mtDNA population samples in forensic databases

Martin Bodner<sup>a</sup>, Jodi A. Irwin<sup>b</sup>, Michael D. Coble<sup>b,1</sup>, Walther Parson<sup>a,\*</sup>

<sup>a</sup>Institute of Legal Medicine, Innsbruck Medical University, Müllerstr. 44, 6020 Innsbruck, Austria

<sup>b</sup>Armed Forces DNA Identification Laboratory, 1413 Research Blvd, Rockville, MD 20850, USA

Gomes et al. *BMC Genomics* (2015) 16:70  
DOI 10.1186/s12864-014-1201-x

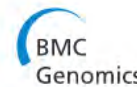

RESEARCH ARTICLE

Open Access

## Human settlement history between Sunda and Sahul: a focus on East Timor (Timor-Leste) and the Pleistocenic mtDNA diversity

Sibylle M Gomes<sup>1†</sup>, Martin Bodner<sup>2†</sup>, Luis Souto<sup>1,3</sup>, Bettina Zimmermann<sup>2</sup>, Gabriela Huber<sup>2</sup>, Christina Strobl<sup>2</sup>, Alexander W Röck<sup>2</sup>, Alessandro Achilli<sup>4,5</sup>, Anna Olivieri<sup>4</sup>, Antonio Torroni<sup>4</sup>, Francisco Côrte-Real<sup>6</sup> and Walther Parson<sup>2,7\*</sup>

analysis and detection conditions [100,121-123]. After typing 15 autosomal STR loci and the amelogenin length polymorphism, pedigree construction, and likelihood ratio (LR) calculation using reported STR allele frequencies [7] [correcting the 10.2 allele frequency of D18S51 to 0.0 (L Souto, *pers. comm.*)], no donor pair revealed close maternal relatedness (*i.e.*, mother-child and sibling constellations) applying a cut-off LR of 1,000 [124,125]

Open Access

Erratum

## Erratum

Tamyra R. Moretti Ph.D., Bruce Budowle Ph.D., John S. Buckleton Ph.D.

First published: 3 June 2015 [Full publication history](#)

DOI: 10.1111/1556-4029.12806 [View/save citation](#)

Cited by (CrossRef): 3 articles [Check for updates](#) | [Citation tools](#)

Am scores 2

This article corrects:

\*Names of commercial manufacturers are provided for identification purposes only, and inclusion does not imply endorsement of the manufacturer or its products and services by the FBI. The views are those of the authors and do not necessarily reflect the official policy or position of the FBI or the US government.

**Reference:** Budowle B, Moretti TR, Baumstark AL, Defenbaugh DA, Keys KM. Population data on the thirteen CODIS core short tandem repeat loci in African Americans, US Caucasians, Hispanics, Bahamians, Jamaicans, and Trinidadians. J Forensic Sci 1999;44(6):1277-86.

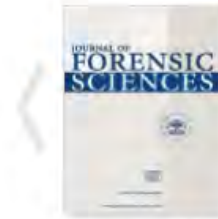

View issue TOC  
Volume 60, Issue 4  
July 2015  
Pages 1114-1116

observations indicating  
the need for STR data QC

Re-typing of a widely applied population dataset after 16 years revealed a certain number of **clerical, technical, and data/sample processing errors**

# Recommendations of the DNA Commission of the International Society for Forensic Genetics (ISFG) on quality control of autosomal Short Tandem Repeat allele frequency databasing (STRidER)

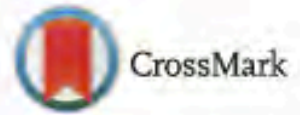

Martin Bodner<sup>a</sup>, Ingo Bastisch<sup>b</sup>, John M. Butler<sup>c</sup>, Rolf Fimmers<sup>d</sup>, Peter Gill<sup>e,f</sup>, Leonor Gusmão<sup>g,h,i</sup>, Niels Morling<sup>j</sup>, Christopher Phillips<sup>k</sup>, Mechthild Prinz<sup>l</sup>, Peter M. Schneider<sup>m</sup>, Walther Parson<sup>a,n,\*</sup>

## Content

- I) Positioning **STRidER** relative to other existing databases (STRbase, ALFRED, popSTR, popAffiliator, ALLST\*R); **important element of QC**
- II) Rationale, concept and workflow of **QC** via **STRidER**
- III) **Benefits** to forensic and other scientific community
- IV) Transparency, traceability and protection of data
- V) Outlook: **STR sequence data** in **STRidER** (MPS)



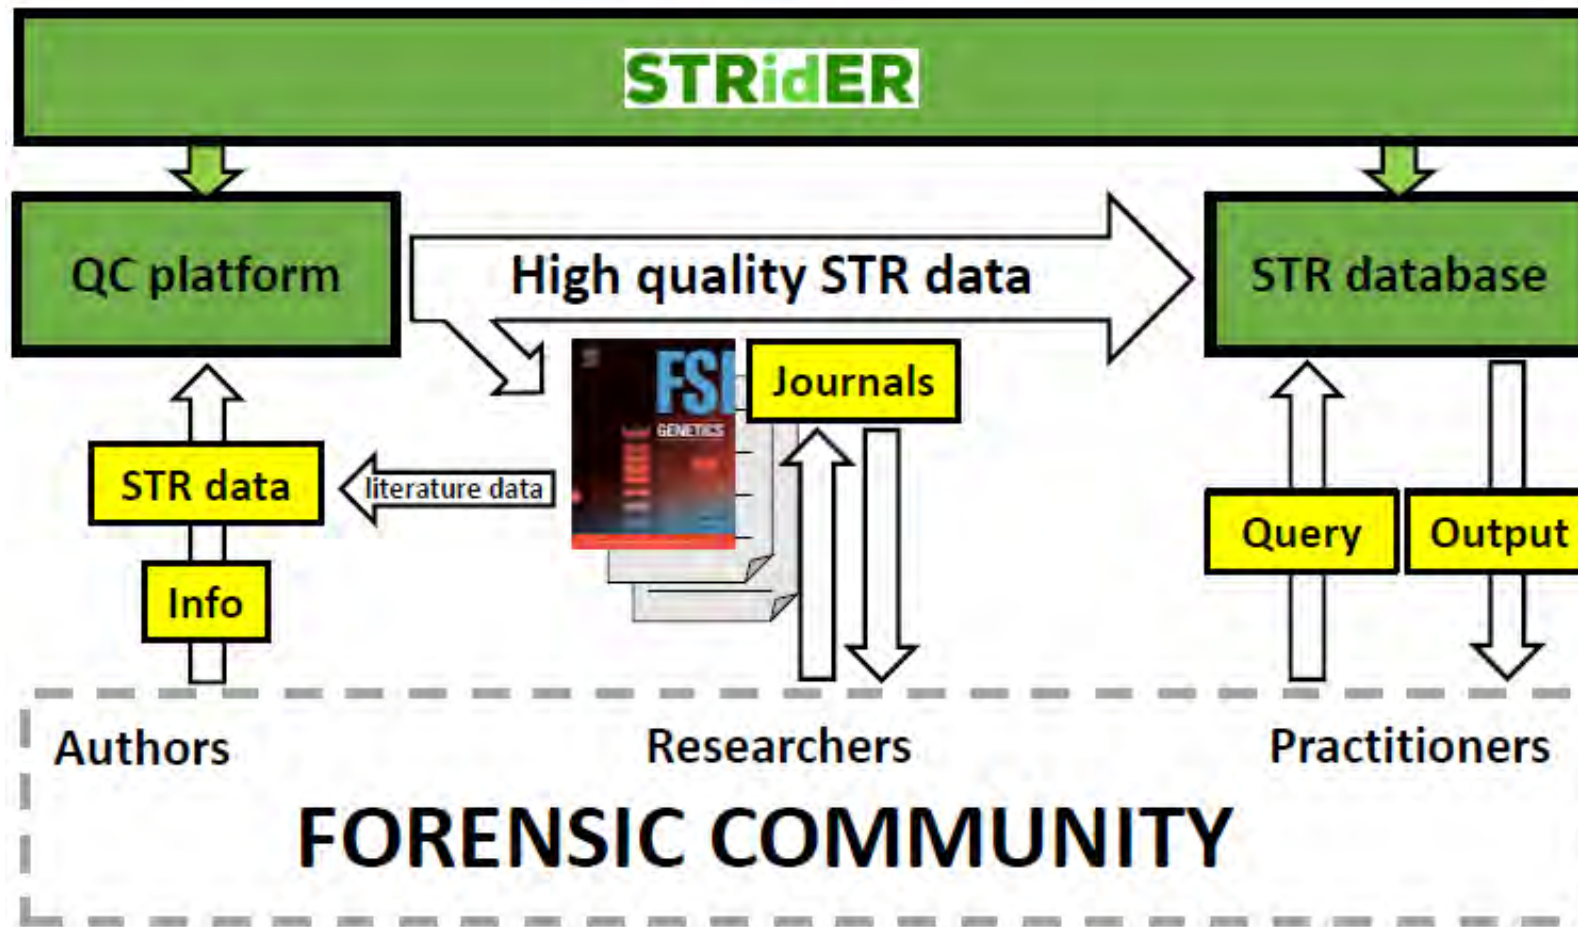

The ENFSI DNA Working Group provides an **updated version** to the previously published 'ENFSI DNA WG STR Population Database'

## Welcome to STRidER!

STRidER (STRs for Identity ENFSI Reference Database) is the expanded and enhanced version of the ENFSI STRbase (2004–2016). This curated online high quality STR allele frequency population database enables scientifically reliable **STR genotype probability estimates** and provides **quality control** of autosomal STR data. A suite of software tools has been developed at the Institute of Legal Medicine, Medical University of Innsbruck to scrutinize STR population data and thus increase the quality of datasets to ensure reliable allele frequency estimates. STRidER acts as **frequency database and software platform** for the development of novel tools for STR data QC and other forensic analyses.

STRidER serves the STR community in forensics and beyond in inter-related ways:

- The high-quality autosomal STR allele frequency database can be directly queried
- Allele frequency tables of STR loci from diverse populations can be downloaded and used for third party software
- Centralized STR data quality control is offered prior to publication
- Accepted datasets will become rapidly available online and receive a unique and traceable STRidER accession number
- Allele frequencies and forensic/population genetic parameters are calculated from datasets
- Individual STR genotypes are not accessible on STRidER to comply with privacy regulations

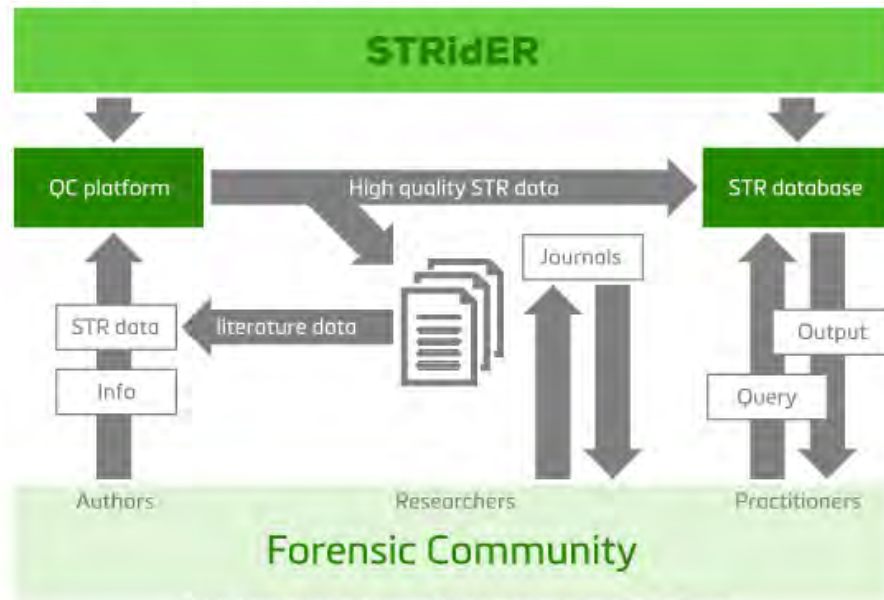

STRidER in the field of forensic STR typing (from Bodner et al. 2016)

The concept of STRidER has been developed together with the DNA Commission of the ISFG and is outlined in Bodner M, Bastisch I, Butler JM, Fimmers R, Gill P, Gusmão L, Marling N, Phillips C, Prinz M, Schneider PM, Parson W (2016) Recommendations of the DNA Commission of the International Society for Forensic Genetics (ISFG) on a quality control of autosomal Short Tandem Repeat allele frequency databasing (STRidER); *Forensic Sci Int Gen* 24:97-102.

The STRidER online platform is work in progress. Additional datasets and features will continuously become available. To receive periodic news and stay updated about STRidER, register here for the STRidER newsletter.

<https://strider.online/>

ongoing addition of  
data and functions

STRidER Newsletter enabled  
(via HOME tab)

## Query

The second version of STRidER holds STR loci defined in the specifications of the ENFSI DNA WG. Additional loci included in commercial kits are not included, as no high quality population data are available. Those loci are dimmed in the input form. [More...](#)

Kit  check/uncheck all

- AUSTRIA
- BELGIUM
- BOSNIA AND HERZEGOWINA
- CZECH REPUBLIC
- DENMARK
- FINLAND
- FRANCE
- GERMANY
- GREECE
- HUNGARY
- IRELAND
- MONTENEGRO
- NORWAY
- POLAND
- SLOVAKIA
- SLOVENIA
- SPAIN
- SWEDEN
- SWITZERLAND

|                      |                      |                      |                      |                      |
|----------------------|----------------------|----------------------|----------------------|----------------------|
| D3S1358              | VWA                  | D16S539              | CSF1PO               | TPOX                 |
| <input type="text"/> |
| <input type="text"/> |
| Y indel              | D8S1179              | D21S11               | D18S51               | DYS391               |
| <input type="text"/> |
| <input type="text"/> |
| D2S441               | D19S433              | TH01                 | FGA                  |                      |
| <input type="text"/> | <input type="text"/> | <input type="text"/> | <input type="text"/> |                      |
| <input type="text"/> | <input type="text"/> | <input type="text"/> | <input type="text"/> |                      |
| D22S1045             | D5S818               | D13S317              | D7S820               | SE33                 |
| <input type="text"/> |
| <input type="text"/> |
| D10S1248             | D1S1656              | D12S391              | D2S1338              |                      |
| <input type="text"/> | <input type="text"/> | <input type="text"/> | <input type="text"/> |                      |
| <input type="text"/> | <input type="text"/> | <input type="text"/> | <input type="text"/> |                      |

## QUERY

according to questionnaire among ENFSI labs

- only **uncorrected AMP** is calculated
- query profile is not added to database
- **correction factors not offered** any longer
- F alleles no longer allowed
- only correction used is **MAF (5/2n)**

Submit

Clear Form



## Query

The CSV file requires *commas (,)* as delimiters and *double quotes (")* as field enclosure characters.  
[Download a sample CSV file.](#)

File format:  CSV  GeneMapper

CSV file:  Keine Datei ausgewählt.

- check/uncheck all
- AUSTRIA
- BELGIUM
- BOSNIA AND HERZEGOWINA
- CZECH REPUBLIC
- DENMARK
- FINLAND
- FRANCE
- GERMANY
- GREECE
- HUNGARY
- IRELAND
- MONTENEGRO
- NORWAY
- POLAND
- SLOVAKIA
- SLOVENIA
- SPAIN
- SWEDEN
- SWITZERLAND

**BATCH QUERY**

Submit

## Frequencies

These tables include allele frequencies and number of samples (n) from the most recent database release sorted by marker and country. In these tables, „1” represents all rare alleles shorter than the accepted allele categories. The value „99” represents all rare alleles longer than the accepted categories.

This data can be downloaded as [XML file](#).

### VWA

| Allele | AUSTRIA   | BELGIUM   | BOSNIA AND HERZEGOWINA | CZECH REPUBLIC | DENMARK   | FINLAND   | FRANCE    | GERMANY   | GREECE    | HUNGARY   | IRELAND   | MONTENEGRO | NORWAY    | POLAND    | SLOVAKIA  | SLOVENIA  | SPAIN     | SWEDEN    | SWITZERLAND | Europe    | Entire Database |           |           |           |
|--------|-----------|-----------|------------------------|----------------|-----------|-----------|-----------|-----------|-----------|-----------|-----------|------------|-----------|-----------|-----------|-----------|-----------|-----------|-------------|-----------|-----------------|-----------|-----------|-----------|
| 11     | 222       | 206       | 171                    | 200            | 200       | 230       | 208       | 662       | 208       | 224       | 304       | 200        | 202       | 206       | 247       | 207       | 449       | 424       | 402         | 5172      | 5172            |           |           |           |
| 12     |           |           |                        |                |           |           |           | 7.5529e-4 |           |           |           |            |           |           |           |           |           |           |             |           | 9.6674e-5       | 9.6674e-5 |           |           |
| 13     |           |           | 1.1696e-2              |                |           |           | 2.2659e-3 | 2.4038e-3 | 2.2321e-3 |           |           |            | 2.4753e-3 |           | 2.0243e-3 | 2.4155e-3 | 6.6815e-3 | 1.1792e-3 |             |           | 1.8368e-3       | 1.8368e-3 |           |           |
| 14     | 1.0586e-1 | 1.0680e-1 | 1.1111e-1              | 1.0000e-1      | 7.0000e-2 | 1.3043e-1 | 8.6539e-2 | 9.7432e-2 | 9.3750e-2 | 1.1161e-1 | 1.1349e-1 | 1.4500e-1  | 8.6634e-2 | 7.7670e-2 | 1.1943e-1 | 1.0145e-1 | 1.1024e-1 | 9.4340e-2 | 1.0448e-1   | 1.0335e-1 | 1.0335e-1       |           |           |           |
| 15     | 9.2342e-2 | 1.2136e-1 | 1.2573e-1              | 9.7500e-2      | 9.7500e-2 | 5.2174e-2 | 1.2740e-1 | 1.0347e-1 | 7.9327e-2 | 1.1384e-1 | 1.0197e-1 | 9.0000e-2  | 9.9010e-2 | 8.4951e-2 | 1.1943e-1 | 1.2077e-1 | 1.2361e-1 | 8.9623e-2 | 1.0697e-1   | 1.0296e-1 | 1.0296e-1       |           |           |           |
| 16     | 1.7568e-1 | 1.9903e-1 | 2.0468e-1              | 1.7500e-1      | 2.6000e-1 | 1.7609e-1 | 2.4038e-1 | 2.2130e-1 | 1.6827e-1 | 2.0536e-1 | 2.1875e-1 | 1.7500e-1  | 2.2277e-1 | 2.2330e-1 | 1.9231e-1 | 1.8599e-1 | 2.4276e-1 | 2.0991e-1 | 2.0647e-1   | 2.0872e-1 | 2.0872e-1       |           |           |           |
| 17     | 2.8604e-1 | 2.7185e-1 | 2.3977e-1              | 3.1250e-1      | 2.3000e-1 | 2.7174e-1 | 2.3317e-1 | 2.5453e-1 | 3.1731e-1 | 3.0134e-1 | 2.7138e-1 | 2.8750e-1  | 2.8960e-1 | 2.7670e-1 | 2.7530e-1 | 2.8985e-1 | 2.7171e-1 | 2.6533e-1 | 2.7736e-1   | 2.7291e-1 | 2.7291e-1       |           |           |           |
| 18     | 2.5901e-1 | 2.0146e-1 | 2.1053e-1              | 2.2750e-1      | 2.4000e-1 | 2.0435e-1 | 2.1154e-1 | 2.2054e-1 | 2.4279e-1 | 1.7634e-1 | 1.9243e-1 | 2.1250e-1  | 1.9802e-1 | 2.4757e-1 | 2.0445e-1 | 2.1739e-1 | 1.7038e-1 | 2.4174e-1 | 2.0896e-1   | 2.1384e-1 | 2.1384e-1       |           |           |           |
| 19     | 7.2072e-2 | 8.0097e-2 | 9.0643e-2              | 7.2500e-2      | 8.2500e-2 | 1.3696e-1 | 8.6539e-2 | 8.6103e-2 | 7.4519e-2 | 7.1429e-2 | 9.3750e-2 | 7.2500e-2  | 8.6634e-2 | 8.0097e-2 | 7.6923e-2 | 5.5556e-2 | 6.1247e-2 | 7.9009e-2 | 8.2090e-2   | 8.0917e-2 | 8.0917e-2       |           |           |           |
| 20     | 9.0090e-3 | 1.9418e-2 | 5.8480e-3              | 1.5000e-2      | 1.7500e-2 | 2.1739e-2 | 1.4423e-2 | 1.2840e-2 | 1.4423e-2 | 1.5625e-2 | 8.2237e-3 | 1.7500e-2  | 1.4852e-2 | 9.7087e-3 | 1.0122e-2 | 2.1739e-2 | 1.3363e-2 | 1.6509e-2 | 1.3682e-2   | 1.4115e-2 | 1.4115e-2       |           |           |           |
| 21     |           |           |                        |                | 2.5000e-3 | 6.5217e-3 |           | 7.5529e-4 | 2.4038e-3 | 2.2321e-3 |           |            |           |           |           |           |           |           |             |           | 4.8309e-3       | 2.3585e-3 | 1.0634e-3 | 1.0634e-3 |

### TH01

| Allele | AUSTRIA   | BELGIUM   | BOSNIA AND HERZEGOWINA | CZECH REPUBLIC | DENMARK   | FINLAND   | FRANCE    | GERMANY   | GREECE    | HUNGARY   | IRELAND   | MONTENEGRO | NORWAY    | POLAND    | SLOVAKIA  | SLOVENIA  | SPAIN     | SWEDEN    | SWITZERLAND | Europe    | Entire Database |           |           |
|--------|-----------|-----------|------------------------|----------------|-----------|-----------|-----------|-----------|-----------|-----------|-----------|------------|-----------|-----------|-----------|-----------|-----------|-----------|-------------|-----------|-----------------|-----------|-----------|
| 5      | 2.2522e-3 | 2.4272e-3 | 1.71                   | 2.00           | 2.00      | 2.30      | 2.08      | 662       | 208       | 224       | 304       | 200        | 202       | 206       | 247       | 207       | 454       | 425       | 402         | 5178      | 5178            |           |           |
| 6      | 2.0946e-1 | 2.1359e-1 | 2.7778e-1              | 2.3750e-1      | 2.3750e-1 | 1.9565e-1 | 2.4038e-1 | 2.2659e-1 | 2.6923e-1 | 2.2098e-1 | 2.3191e-1 | 3.3500e-1  | 2.2030e-1 | 2.0631e-1 | 2.3077e-1 | 2.3430e-1 | 2.5330e-1 | 1.9529e-1 | 2.1890e-1   | 2.3165e-1 | 2.3165e-1       |           |           |
| 7      | 1.2613e-1 | 1.8689e-1 | 1.3158e-1              | 1.6000e-1      | 1.5250e-1 | 2.1522e-1 | 1.5865e-1 | 1.4804e-1 | 1.2019e-1 | 1.6071e-1 | 2.0230e-1 | 1.0750e-1  | 2.3267e-1 | 1.5291e-1 | 1.4372e-1 | 1.3043e-1 | 1.7181e-1 | 1.9059e-1 | 1.7537e-1   | 1.6348e-1 | 1.6348e-1       |           |           |
| 8      | 1.1486e-1 | 1.2136e-1 | 1.3158e-1              | 1.0000e-1      | 1.1250e-1 | 1.1522e-1 | 1.2019e-1 | 1.3897e-1 | 1.3462e-1 | 1.1384e-1 | 9.2105e-2 | 1.4500e-1  | 8.6634e-2 | 8.4951e-2 | 1.2348e-1 | 1.2560e-1 | 1.0573e-1 | 9.1765e-2 | 1.2189e-1   | 1.1529e-1 | 1.1529e-1       |           |           |
| 8.3    | 2.2522e-3 |           | 2.9240e-3              |                |           |           |           | 7.5529e-4 |           |           |           |            |           |           | 2.0243e-3 |           |           |           |             |           | 1.2438e-3       | 4.8281e-4 | 4.8281e-4 |
| 9      | 1.6441e-1 | 1.5049e-1 | 1.9883e-1              | 1.7750e-1      | 1.5250e-1 | 1.8913e-1 | 1.8269e-1 | 1.7523e-1 | 2.1635e-1 | 2.1205e-1 | 1.3651e-1 | 1.7750e-1  | 1.3366e-1 | 2.1359e-1 | 2.0040e-1 | 1.9565e-1 | 1.9053e-1 | 1.5765e-1 | 1.7413e-1   | 1.7748e-1 | 1.7748e-1       |           |           |
| 9.3    | 3.6712e-1 | 3.1796e-1 | 2.4561e-1              | 3.2250e-1      | 3.4000e-1 | 2.7826e-1 | 2.8365e-1 | 2.9305e-1 | 2.3077e-1 | 2.7679e-1 | 3.2895e-1 | 2.2250e-1  | 3.1436e-1 | 3.3010e-1 | 2.9555e-1 | 3.0193e-1 | 2.6982e-1 | 3.5647e-1 | 2.9353e-1   | 2.9973e-1 | 2.9973e-1       |           |           |
| 10     | 1.1261e-2 | 7.2816e-3 | 1.1696e-2              | 2.5000e-3      | 5.0000e-3 | 6.5217e-3 | 1.4423e-2 | 1.5861e-2 | 2.8846e-2 | 1.3393e-2 | 8.2237e-3 | 1.2500e-2  | 9.9010e-3 | 1.2136e-2 | 4.0486e-3 | 1.2077e-2 | 8.8106e-3 | 7.0588e-3 | 1.3682e-2   | 1.1008e-2 | 1.1008e-2       |           |           |
| 10.3   | 2.2522e-3 |           |                        |                |           |           |           |           |           |           |           |            |           |           |           |           |           |           |             |           | 9.6562e-5       | 9.6562e-5 |           |

## Formulae

### Actual matching probability

$$P_m = 2p_i p_j \quad \text{Heterozygotes}$$

$$P_m = p_i^2 \quad \text{Homozygotes}$$

A minimum allele frequency of  $5/2n$  [1] is used for calculations.

[1] National Research Council. (1996) The evaluation of forensic DNA evidence. National Academy Press, Washington D.C.



# MPS STR Nomenclature: ISFG considerations

Forensic Science International: Genetics 22 (2016) 54–63

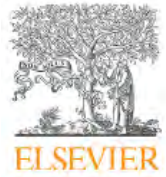

Contents lists available at ScienceDirect

Forensic Science International: Genetics

journal homepage: [www.elsevier.com/locate/fsig](http://www.elsevier.com/locate/fsig)

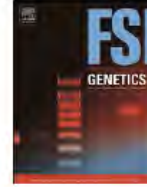

Massively parallel sequencing of forensic STRs: Considerations of the DNA commission of the International Society for Forensic Genetics (ISFG) on minimal nomenclature requirements

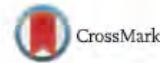

Walther Parson<sup>a,b,\*</sup>, David Ballard<sup>c</sup>, Bruce Budowle<sup>d,e</sup>, John M. Butler<sup>f</sup>, Katherine B. Gettings<sup>f</sup>, Peter Gill<sup>g,h</sup>, Leonor Gusmão<sup>i,j,k</sup>, Douglas R. Hares<sup>l</sup>, Jodi A. Irwin<sup>l</sup>, Jonathan L. King<sup>d</sup>, Peter de Knijff<sup>m</sup>, Niels Morling<sup>n</sup>, Mechthild Prinz<sup>o</sup>, Peter M. Schneider<sup>p</sup>, Christophe Van Neste<sup>q</sup>, Sascha Willuweit<sup>r</sup>, Christopher Phillips<sup>s</sup>

**ESM1 file showing STR sequence structure + flanking region**

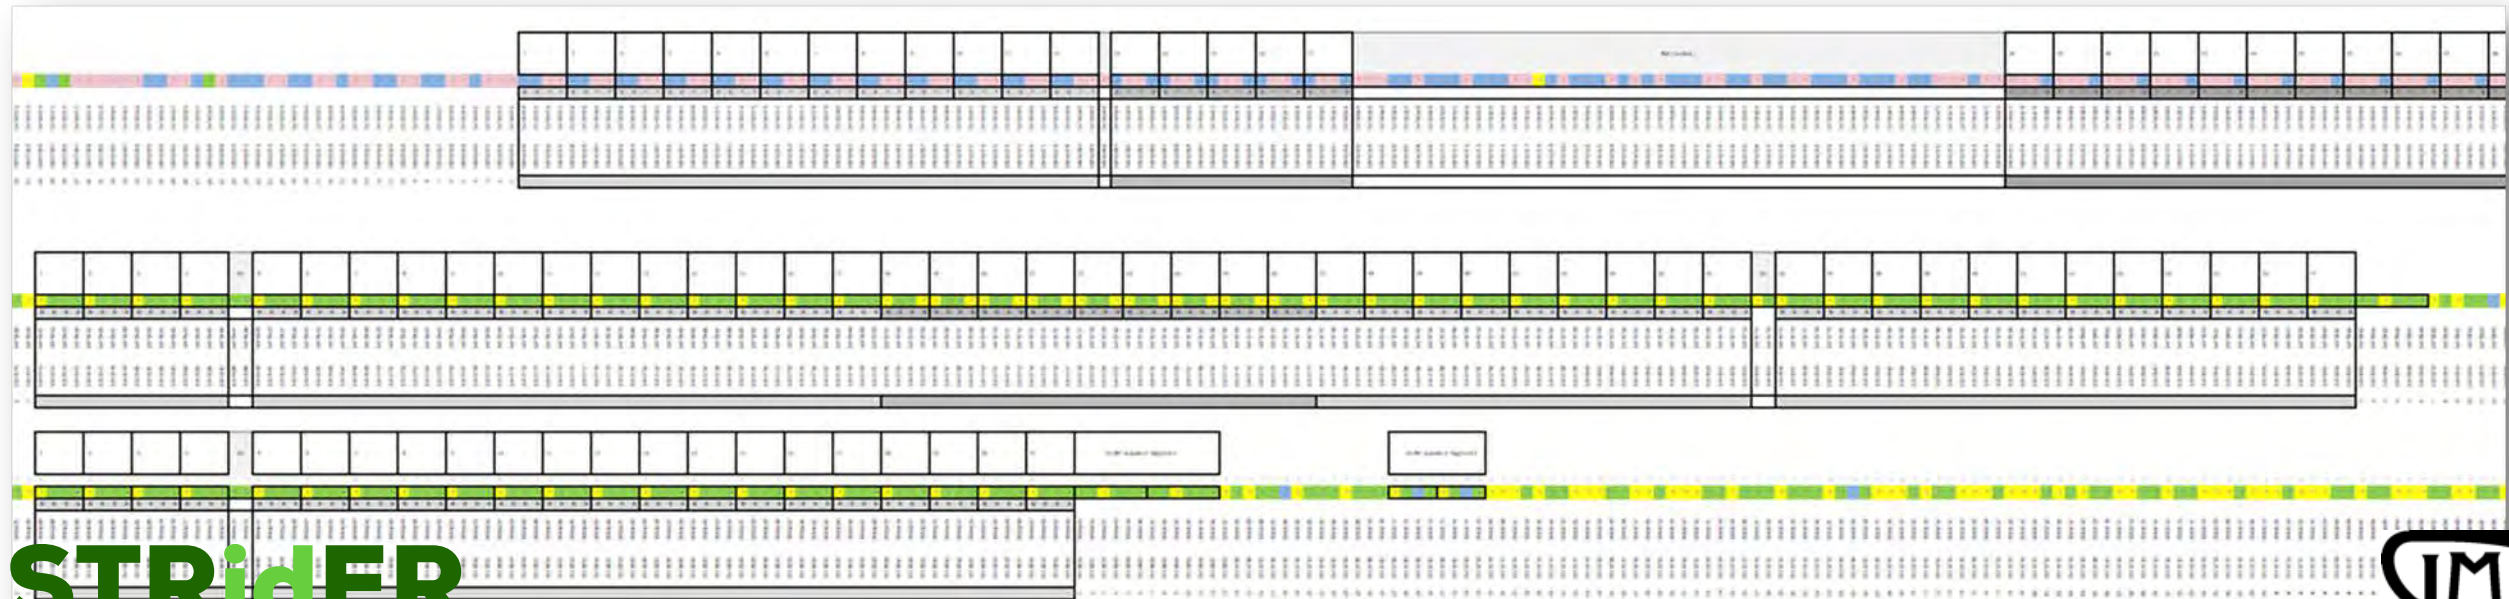

**STRidER**

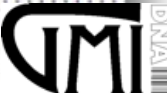

### STR Sequence Nomenclature

The 'Forensic STR Sequence Structure' file is an updated set of forensic STR sequences that was originally Parson W, Ballard D, Budowle B, Butler JM, Gettings KB, Gill P, Gusmão L, Hares DR, Irwin JA, King JL, de Kn Willuweit S, Phillips C: **Massively parallel sequencing of forensic STRs: Considerations of the DNA commission (ISFG) on minimal nomenclature requirements.** Forensic Science International Genetics 2016, 22: 54-63 (<http://www.isfg.org/Publication;Parson2016>).

The original file has been expanded, enhanced and revised as described in the publication Phillips C, Gettings KB: **"The devil's in the detail": Release of an expanded, enhanced and dynamically revised forensic STR Sequence Structure file.** The most recent version of this permanently curated and updated Forensic STR sequence structure file can be found [here](#). The updates since the last version are reported in a change log contained in the file. To receive information about the structure file and to stay updated about STRidER, [register here](#) for the STRidER newsletter.

Forensic Science International: Genetics 34 (2018) 162-169

Contents lists available at ScienceDirect

Forensic Science International: Genetics

journal homepage: [www.elsevier.com/locate/fsigen](http://www.elsevier.com/locate/fsigen)

ELSEVIER

FSI GENETICS

Check for updates

"The devil's in the detail": Release of an expanded, enhanced and dynamically revised forensic STR Sequence Guide

C. Phillips<sup>a,\*</sup>, K. Butler Gettings<sup>b</sup>, J.L. King<sup>c</sup>, D. Ballard<sup>d</sup>, M. Bodner<sup>e</sup>, L. Borsuk<sup>b</sup>, W. Parson<sup>e,f</sup>

<sup>a</sup> Forensic Genetics Unit, Institute of Forensic Sciences, University of Santiago de Compostela, Spain  
<sup>b</sup> National Institute of Standards and Technology, Biomolecular Measurement Division, Gaithersburg, MD, USA  
<sup>c</sup> Institute of Applied Genetics, Department of Molecular and Medical Genetics, University of North Texas Health Science Center, Fort Worth, TX, USA  
<sup>d</sup> King's Forensics, King's College London, Franklin-Wilkins Building, London, UK  
<sup>e</sup> Institute of Legal Medicine, Medical University of Innsbruck, Innsbruck, Austria  
<sup>f</sup> Forensic Science Program, The Pennsylvania State University, University Park, PA, USA, USA

**Updated Forensic STR Sequence Structure Guide and change log is available on STRidER**

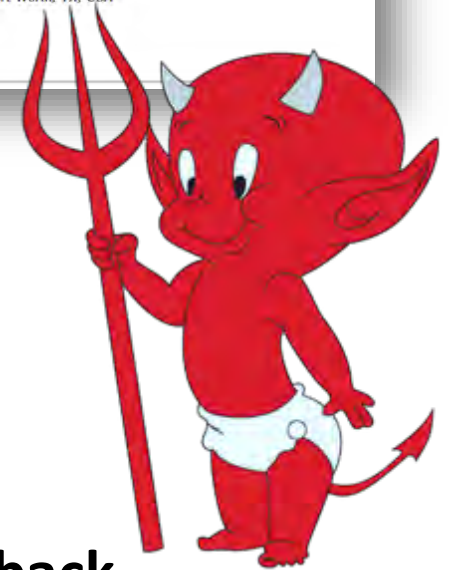



## Quality Control

STRidER provides quality control of autosomal STR data. STRidER is accepting datasets from diverse worldwide populations and forensically relevant autosomal STR markers that comply with ethical standards. Minimum requirements of journals might apply when datasets are intended for peer reviewed publication. A suite of software tools has been developed to scrutinize STR population data and thus increase the quality of datasets to ensure reliable allele frequency estimates. The board of the International Society of Forensic Genetics (ISFG) and the editors of *Forensic Science International: Genetics* [1] are 15 autosomal STR loci typed in 500 samples (for exceptional populations, the latter number can be smaller, please contact STRidER before submission). Before STR population papers are put forward to the editors for review, the authors are requested to submit the data to STRidER. After positive evaluation, the authors will be contacted with the respective STRidER accession numbers that serve as indicator of successful QC for the editors and reviewers. The necessary steps for submission of CE-based STR data to STRidER are outlined below. Please contact [STRidER](#) in case you want to submit STR sequence data.

### Step 1

Prepare your **STR data file** as shown in the example file [that can be downloaded](#) and used as template. It is a tab delimited text file that can be created using standard text software or MS Excel (then, save file under .txt format). The minimum requirements for population datasets for *Forensic Science International: Genetics* [1] are 15 autosomal STR loci typed in 500 samples (for exceptional populations, the latter number can be smaller, please contact STRidER before submission).

The initial lines (identified using the "#" symbol) specify details of the dataset and origin of the samples. Line 1 must contain a description of population(s) reported (e.g., the title of the study), number of samples, geographic origin, and the number of STR loci. Line 2 must indicate the contact author's name with email address. Further text lines marked with "#" can be included for comments or description of the detailed geographic background and the appropriate metapopulation affiliation of the genotypes. Lines below these text lines list the original STR genotypes. Allele nomenclature criteria are applied as described in the "About" tab of this website. The order of loci does not matter. Alleles for the same locus have to be reported in adjacent columns. Loci names must not contain spaces. Report both alleles for homozygous loci. Use "." instead of "," for incomplete alleles, e.g. "9.3" not "9,3". Note that only complete genotypes are accepted. It is imperative that STR genotypes are reported individually and unshuffled using a unique identifier for each genotype in the dataset. The names are necessary for correspondence.

Also prepare an **accompanying STR information file** per population containing additional information on the dataset [as outlined in the example information file](#). This information might be necessary for evaluation of the dataset. Keep raw data files available for any later inquiries. Please also send the allele frequency table and forensic parameters you have calculated from the dataset (no special format required).

### Step 2

Submit your files to STRidER by email (see [contact](#)). The genotype data should be submitted as a file containing the following notation: Author\_country\_number of samples.txt (e.g. Parson\_AUT\_573.txt), the accompanying file should be named Author\_country\_number of samples\_Info.xls or .xlsx (e.g. Parson\_AUT\_573\_Info.xls). The data will be quality checked as outlined in [2] using in-house software.

### Step 3

After STRidER evaluation, communication with respect to individual genotypes may follow. Once your data passed QC you will receive the STRidER accession number(s) for your data together with allele frequencies and forensic/population genetic parameters calculated from the dataset(s). Please provide accession number(s) to the journal editor and cite STRidER [2] in your manuscript.

### Step 4

Data that successfully passed QC will be uploaded onto the STRidER database.

### References

[1] Gusmão L, Butler JM, Linacre A, Parson W, Roewer L, Schneider PM, Carracedo A (2017) Revised guidelines for the publication of genetic population data; *Forensic Sci Int Gen* 30:160-163

[2] Bodner M, Bastisch I, Butler JM, Fimmers R, Gill P, Gusmão L, Morling N, Phillips C, Prinz M, Schneider PM, Parson W (2016) Recommendations of the DNA Commission of the International Society for Forensic Genetics (ISFG) on quality control of autosomal Short Tandem Repeat allele frequency databasing (STRidER); *Forensic Sci Int Gen* 24:97-102.

**QUALITY CONTROL**  
**instructions**



# FSI:G Guidelines 2017

Forensic Science International: Genetics xxx (2017) xxx–xxx

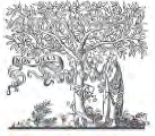

ELSEVIER

Contents lists available at ScienceDirect

Forensic Science International: Genetics

journal homepage: [www.elsevier.com/locate/fsig](http://www.elsevier.com/locate/fsig)

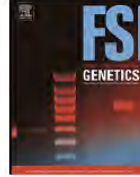

**STRidER QC  
is now mandatory**

Editorial

Revised guidelines for the publication of genetic population data

Since 2007, when the journal was launched, the number of submissions of manuscripts reporting population genetic data to FSI: Genetics has continuously increased. This type of data is very welcome, considering the importance of having accurate estimates

## 1. Quality control of population DNA databases

To improve the quality of the submitted to the journal, in 2010 [1]

Gusmao et al., 2017

To also improve the quality of the data generated from autosomal STRs, the ISFG executive board and the editors of FSI: Genetics have now invited STRidER (<http://strider.online>), a publicly available, centrally curated online allele frequency database and quality control platform for autosomal STRs [5], to logistically organize and perform quality control before autosomal STR manuscripts are put forward for review. Upon successful QC, STRidER accession numbers will be assigned to the submitted population data that serve as indicators of successful QC for the editors and reviewers. The necessary steps for submission of autosomal STR genotypes to STRidER are outlined below.

# Submission of STR data for QC to STRidER

- instructions on data preparation and submission in publication and on website
- template files on website

Please provide this information in as much detail as possible. It can be helpful for evaluating your STR genotype data.  
Please name this file "Author\_country\_number of samples\_info".xls

|                                                                             |                                                        |
|-----------------------------------------------------------------------------|--------------------------------------------------------|
| accompanying information file for STR dataset                               | Parson_AUT_527.txt                                     |
| submitting lab                                                              | Institute of Legal Medicine, Innsbruck, Austria        |
| contact person name                                                         | Walther Parson                                         |
| contact person e-mail                                                       | walther.parson@i-med.ac.at                             |
| lab accreditation status if any                                             | ISO 17025                                              |
| intention for manuscript publication                                        | yes or no                                              |
| manuscript running title                                                    | STR population data for Austria                        |
| intended journal                                                            | FSI Genetics                                           |
| informed consent/ethics approval/data generation according to national laws | not applicable / confirmed                             |
| type of sample set                                                          | tribe / admixed urban population                       |
| exclusion/inclusion criteria                                                | including all residents                                |
| unrelatedness                                                               | four generations, assessed by interviews               |
| geographic origin country/region/city                                       | Austria/Tyrol (province)                               |
| metapopulation                                                              | unspecified                                            |
| subpopulations                                                              | none                                                   |
| total number of individuals                                                 | 527                                                    |
| published data from overlapping samples                                     | yes, sample 1 published in XYZ                         |
| concordance if applicable                                                   | yes                                                    |
| type of specimen                                                            | buccal swabs                                           |
| DNA extraction method/direct amp.                                           | Chelex-100                                             |
| CE length based alleles/allele sequencing                                   | CE length based                                        |
| STR typing kit version/ homemade                                            | insert name of commercial kit                          |
| allelic ladder                                                              | ladder included in kit or other                        |
| detection platform                                                          | ABI3100                                                |
| detection chemistry (polymer)                                               | POP5, POP6                                             |
| data analysis software                                                      | insert name of software                                |
| data analysis software settings                                             | standard settings                                      |
| peak detection thresholds                                                   | insert rfu thresholds                                  |
| positive control(s) - pass/fail/none                                        | 6 of 6 passed                                          |
| raw data available                                                          | yes (if not: please contact STRidER before submission) |
| data transfer mode (manual/automated)                                       | manual                                                 |
| suspected null alleles                                                      | none                                                   |
| observed discordances from different chemistries                            | n.a.                                                   |
| additional comments concerning the dataset                                  | none                                                   |

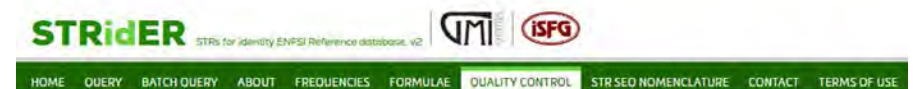

## Quality Control

STRidER provides quality control of autosomal STR data. STRidER is accepting datasets from diverse worldwide populations and forensically relevant autosomal STR markers that comply with ethical standards. Minimum requirements of journals might apply when datasets are intended for peer-reviewed publication. A suite of software tools has been developed to scrutinize STR population data and thus increase the quality of datasets to ensure reliable allele frequency estimates. The board of the International Society of Forensic Genetics (ISFG) and the editors of Forensic Science International: Genetics invited STRidER to logically organize and perform quality control (QC) of autosomal STR population data in the course of manuscript preparations for the journal [1]. Before STR population papers are put forward to the editors for review, the authors are requested to submit the data to STRidER. After positive evaluation, the authors will be contacted with the respective STRidER accession numbers that serve as an indicator of successful QC for the editors and reviewers. The necessary steps for submission of CE-based STR data to STRidER are outlined below. Please contact STRidER in case you want to submit STR sequence data.

### Step 1

Prepare your STR data file as shown in the example file that can be downloaded and used as template. It is a tab delimited text file that can be created using standard text software or MS Excel (then, save file under .txt format). The minimum requirements for population datasets for Forensic Science International: Genetics [1] are 15 autosomal STR loci typed in 500 samples (for exceptional populations, the latter number can be smaller, please contact STRidER before submission).

The initial lines (identified using the "#") specify details of the dataset and origin of the samples. Line 1 must contain a description of population(s) reported (e.g., the title of the study), number of samples, geographic origin, and the number of STR loci. Line 2 must indicate the contact author's name with email address. Further text lines marked with "#" can be included for comments or description of the detailed geographic background and the appropriate metapopulation/offspring of the genotypes. Lines below these text lines list the original STR genotypes. Allele nomenclature criteria are applied as described in the "About" tab of this website. The order of loci does not matter. Alleles for the same locus have to be reported in adjacent columns. Locus names must not contain spaces. Report both alleles for homozygous loci. Use "-" instead of "/" for incomplete alleles, e.g. "19.3" not "19.3:". Note that only complete genotypes are accepted. It is imperative that STR genotypes are reported individually and unshuffled using a unique identifier for each genotype in the dataset. The names are necessary for correspondence.

Also prepare an accompanying STR information file per population containing additional information on the dataset as outlined in the example information file. This information might be necessary for evaluation of the dataset. Keep raw data files available for any later inquiries. Please also send the allele frequency table and forensic parameters you have calculated from the dataset (no special format required).

### Step 2

Submit your files to STRidER by email (see contact). The genotype data should be submitted as a file containing the following notation: Author\_country\_number of samples.txt (e.g. Parson\_AUT\_527.txt), the accompanying file should be named Author\_country\_number of samples\_info.xls or xls (e.g. Parson\_AUT\_527\_info.xls). The data will be quality checked as outlined in [2] using in-house software.

### Step 3

After STRidER evaluation, communication with respect to individual genotypes may follow. Once your data passed QC you will receive the STRidER accession number(s) for your data together with allele frequencies and forensic/population genetic parameters calculated from the dataset(s). Please provide accession number(s) to the journal editor and cite STRidER [2] in your manuscript.

### Step 4

Data that successfully passed QC will be uploaded onto the STRidER database.

### References

[1] Guimó L, Butler JM, Lindors A, Parson W, Roewer L, Schneider PM, Carracedo A (2017) Revised guidelines for the publication of genetic population data. Forensic Sci Int Gen 30:160-163.

[2] Bodnar M, Bostasson I, Butler JM, Fimmers R, Gil P, Guimó L, Morling N, Phillips C, Prinz M, Schneider PM, Parson W (2016) Recommendations of the DNA Commission of the International Society for Forensic Genetics (ISFG) on quality control of autosomal Short Tandem Repeat allele frequency databasing (STRidER). Forensic Sci Int Gen 24:97-102.

```
# 527 unshuffled genotypes from Austria, Tyrol province, at 22 autosomal STR loci using kit XYZ
# submitted by Walther Parson, Institute of Legal Medicine, Medical University of Innsbruck, walther.parson@i-med.ac.at
# admixed urban population, random unrelated sample
# this file should be named "Author_country_number of samples.txt" (e.g., "Parson_AUT_527.txt")
# further lines marked with "#" can be included for comments or description of the detailed geographic background and the appropriate m
Sample ID      AMEL  AMEL  D3S1358  D3S1358  D1S1656  D1S1656  D2S441  D2S441  D10S1248  D10S1248  D13S317  D13S317  PENTA_E
sample1 X      Y      15    18      12      17.3    11.3    14      14      17      12      13      7      23      10      12
sample2 ...    ...    ...    ...    ...    ...    ...    ...    ...    ...    ...    ...    ...    ...    ...
sample3 ...    ...    ...    ...    ...    ...    ...    ...    ...    ...    ...    ...    ...    ...
sample4 ...    ...    ...    ...    ...    ...    ...    ...    ...    ...    ...    ...    ...    ...
...            ...    ...    ...    ...    ...    ...    ...    ...    ...    ...    ...    ...    ...
```

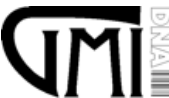

# QC of STR data on STRidER

Recommendations of the DNA Commission of the International Society for Forensic Genetics (ISFG) on quality control of autosomal Short Tandem Repeat allele frequency databasing (STRidER)

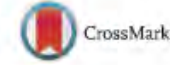

Martin Bodner<sup>a</sup>, Ingo Bastisch<sup>b</sup>, John M. Butler<sup>c</sup>, Rolf Fimmers<sup>d</sup>, Peter Gill<sup>e,f</sup>, Leonor Gusmão<sup>g,h,i</sup>, Niels Morling<sup>j</sup>, Christopher Phillips<sup>k</sup>, Mechthild Prinz<sup>l</sup>, Peter M. Schneider<sup>m</sup>, Walther Parson<sup>a,n,\*</sup>

- assessment of **non-DNA** information
- assessment of reported **genotypes** and allele frequencies in dataset
- EPGs / **raw data** might be requested for QC: **true variants or errors?**
- **optimized procedure** for the detection of common data idiosyncrasies
- not an independent evaluation of all raw data
- **communication** during entire QC: discussion of all findings





# Flowchart of QC on STRidER

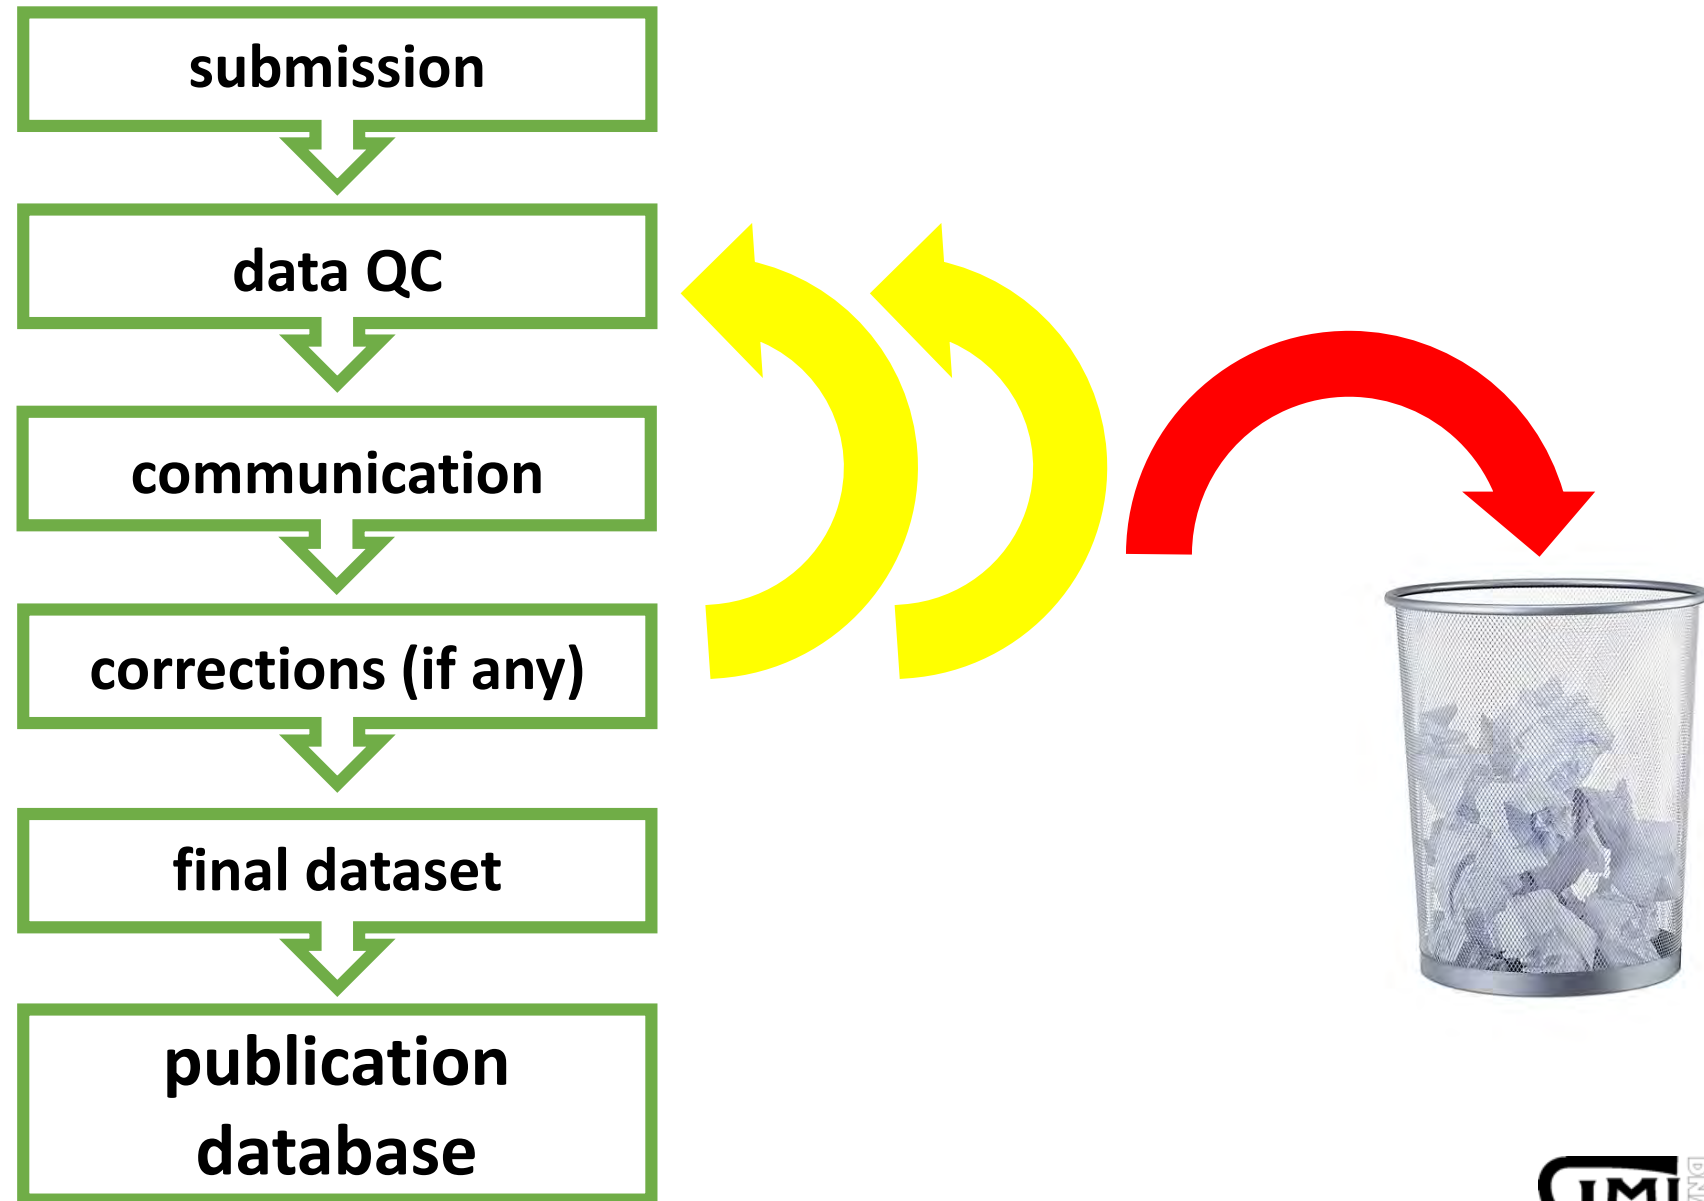

# Report on QC of STR data on **STRidER**

Information on **QC process**

Detailed **QC report**

- submitted data
- **corrections** made to dataset

**FIGURE REMOVED**

**STRidER accession number** (STR.....) for publication

(corrected) **dataset** + allele frequency table



# Submissions to STRidER Aug 2017 – March 2019

CE STR data  
**n = 144,511**  
**139 datasets**

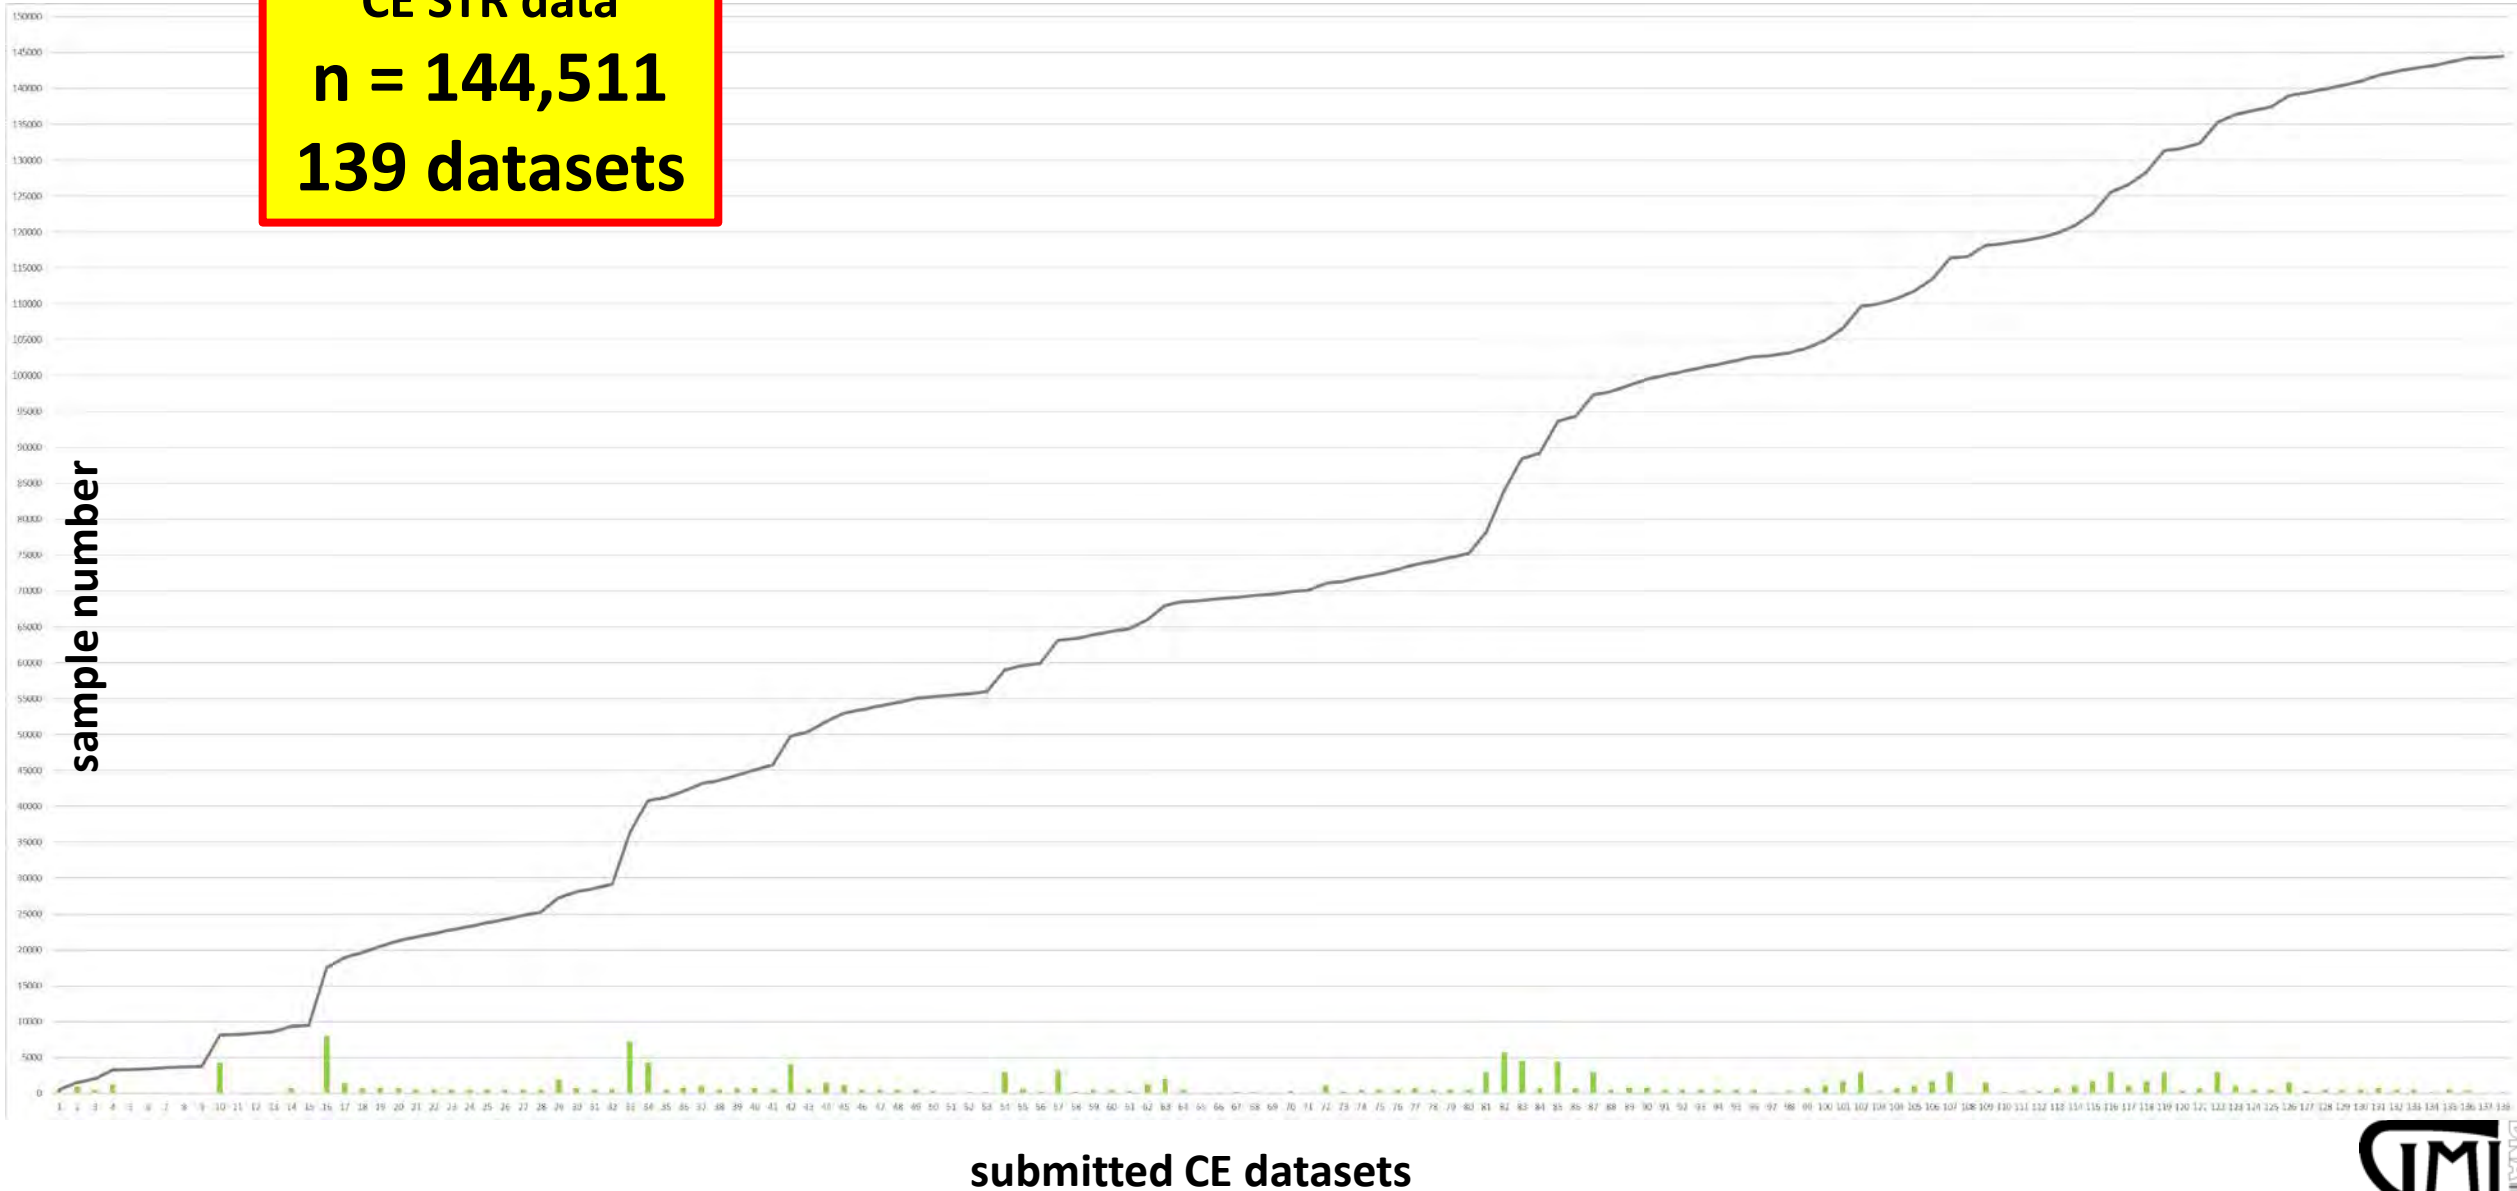

# Online submission tool for QC

- **form** to enter required non-genetic information (drop-down/free text)
- upload of **genotype table** in required format
- **initial plausibility tests** performed during submission process
- submission completed: e-mail notification to submitter and **STRidER**
- **external testing** ongoing **dna.bases**

**back to more basic checks  
(completeness etc.)**

# Related activities

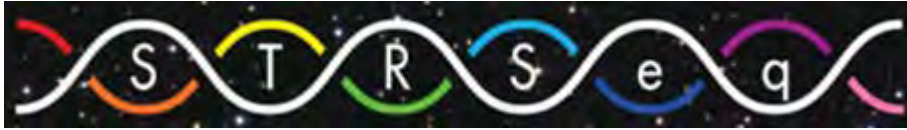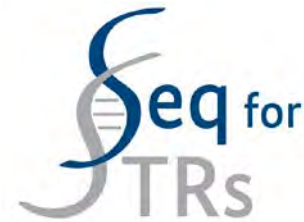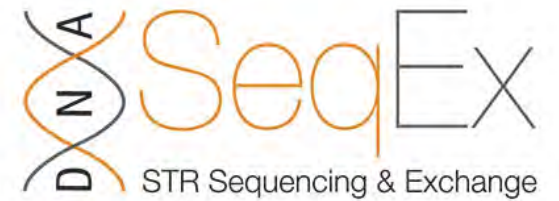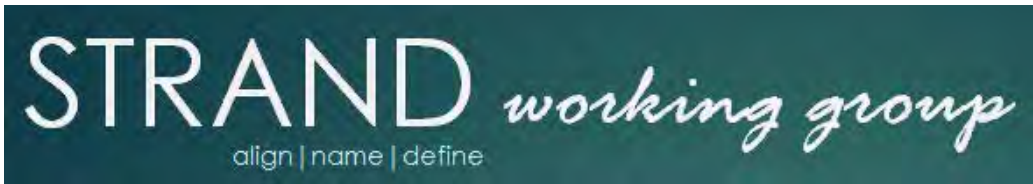

**dna.bases**

**STRidER**

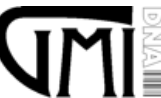

# (1) STRSeq NCBI BioProject

Mission: To provide **high-confidence STR allele sequence records** with uniform annotation, facilitating exchange of information across forensic laboratories.

- collaborators with large datasets “seed” the BioProject
- NIST evaluates raw sequence data with agnostic bioinformatic pipeline
- GenBank record for **all unique sequences**
- BioProject searchable by string (BLAST), locus, allele...

# STRAND *working group*

align | name | define

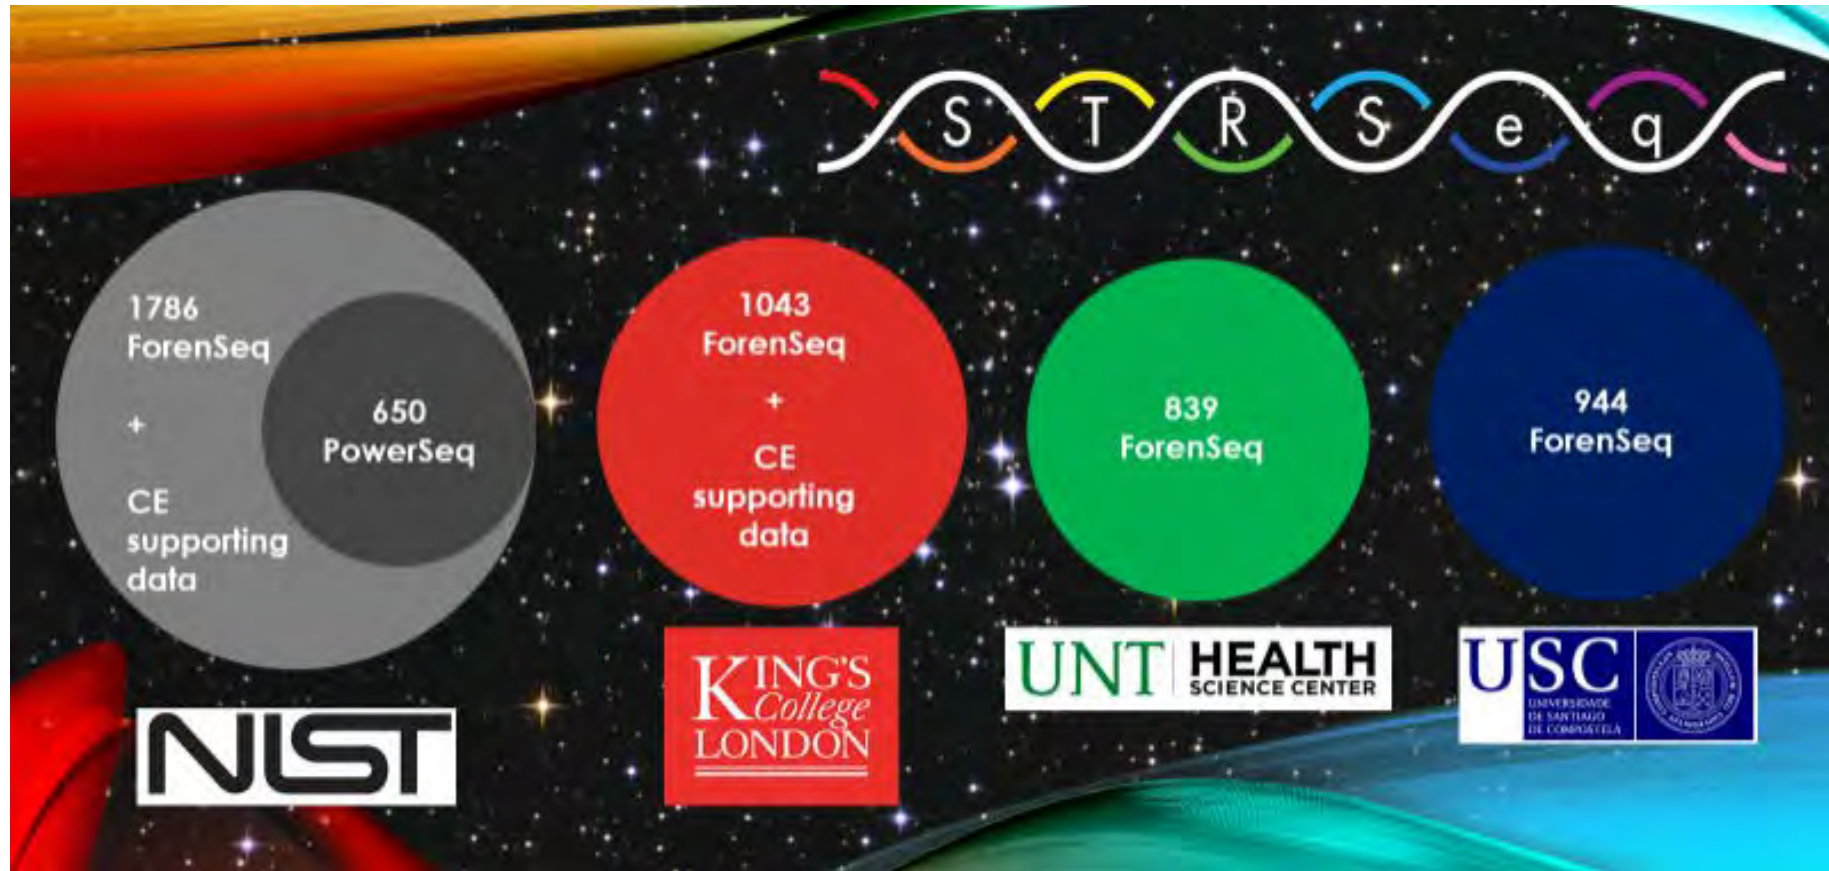

[www.ncbi.nlm.nih.gov/bioproject/PRJNA380127](http://www.ncbi.nlm.nih.gov/bioproject/PRJNA380127)



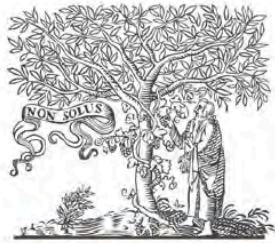

ELSEVIER

Contents lists available at [ScienceDirect](#)

## Forensic Science International: Genetics

journal homepage: [www.elsevier.com/locate/fsigen](http://www.elsevier.com/locate/fsigen)

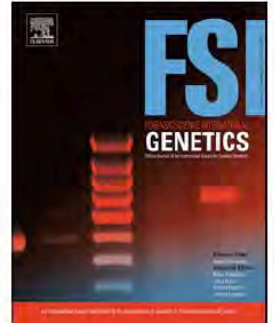

Research paper

### STRSeq: A catalog of sequence diversity at human identification Short Tandem Repeat loci

Katherine Butler Gettings<sup>a,\*</sup>, Lisa A. Borsuk<sup>a</sup>, David Ballard<sup>b</sup>, Martin Bodner<sup>c</sup>, Bruce Budowle<sup>d,e</sup>, Laurence Devesse<sup>b</sup>, Jonathan King<sup>d</sup>, Walther Parson<sup>c,f</sup>, Christopher Phillips<sup>g</sup>, Peter M. Vallone<sup>a</sup>

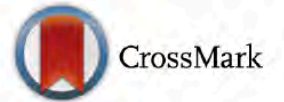

**NCBI BioProject-STRseq** and **STRidER**  
Collaboration in QC and exchange of data



# (2) DNASEQEX

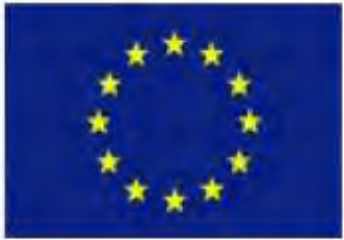

*DNA-STR Massive Sequencing & International Information Exchange*  
(HOME/2014/ISFP/AG/LAWX/4000007135)

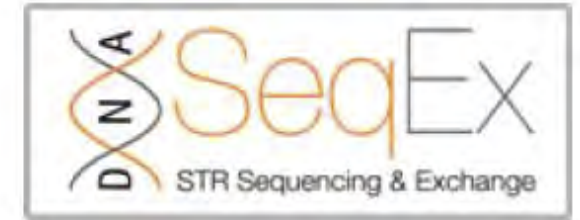

## DNASEqEx - DNA-STR Massive Sequencing & International Information Exchange

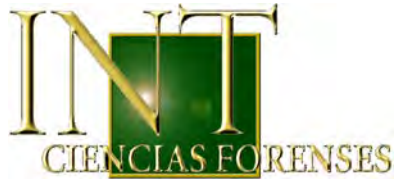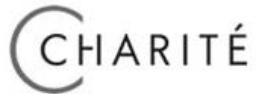

UNIVERSITÄTSMEDIZIN BERLIN

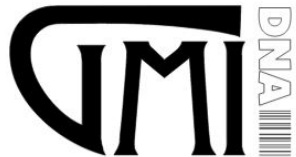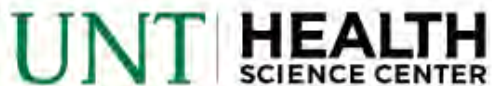

2 years (2016-2018)

Project

DNASEQEX

Lutz Roewer Walther Parson Antonio Alonso Sascha Willuweit  
 Bruce Budowle

**Institutions:** Charité Universitätsmedizin Berlin, Medizinische Universität Innsbruck, Instituto Nacional de Toxicología y Ciencias Forenses

**Goal:** DNASEQEX is an EU-funded project called "DNA-STR Massive Sequencing & International Information Exchange"; includes the validation of a global 23 STR & 27 Y-STR profiling system by Massively Parallel Sequencing (MPS); testing of 50 marker... [+](#)

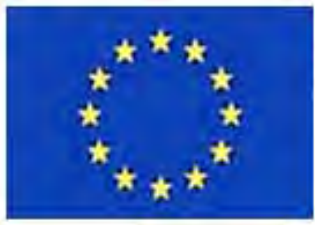

## Objectives

- Promote the implementation of MPS technology for improved STR profiling and international data exchange  
→ Inter-laboratory evaluation studies
- Evaluate the impact of STR sequencing on National DNA databases (EU Prüm)  
→ Alonso et al. 2017 **FSIG**
- Facilitate and standardize forensic STR sequence allele nomenclature  
→ **NOMAUT** - lead Berlin

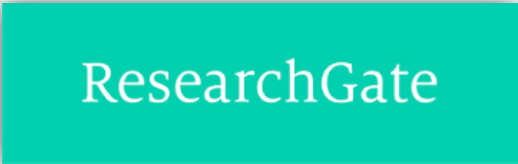

# European survey on forensic applications of massively parallel sequencing

Antonio Alonso

National Institute of Toxicology and Forensic Sciences, Madrid Department, Spain

Petra Müller

Institute of Legal Medicine, Medical University of Innsbruck, Austria

Lutz Roewer, Sascha Willuweit

Institute of Legal Medicine and Forensic Sciences, Charité–Universitätsmedizin Berlin, Germany

Bruce Budowle

Walther Parson

PlumX Metrics

DOI: <https://doi.org/10.1016/j.fsigen.2017.04.017> |

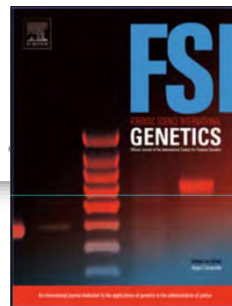

Research paper

# Inter-laboratory validation study of the ForenSeq™ DNA Signature Prep Kit

Steffi Köcher<sup>a,\*,1</sup>, Petra Müller<sup>b,1</sup>, Burkhard Berger<sup>b</sup>, Martin Bodner<sup>b</sup>, Walther Parson<sup>b,c</sup>, Lutz Roewer<sup>a</sup>, Sascha Willuweit<sup>a</sup>, The DNASEqEx Consortium

<sup>a</sup> Institute of Legal Medicine and Forensic Sciences, Charité – Universitätsmedizin Berlin, Germany

<sup>b</sup> Institute of Legal Medicine, Medical University of Innsbruck, Austria

<sup>c</sup> Forensic Science Program, The Pennsylvania State University, PA, USA

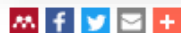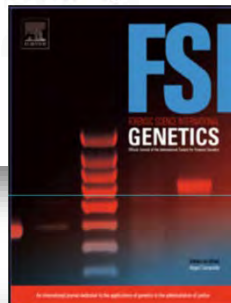

Research paper

# Systematic evaluation of the early access applied biosystems precision ID Globalfiler mixture ID and Globalfiler NGS STR panels for the ion S5 system

Petra Müller<sup>a</sup>, Antonio Alonso<sup>b</sup>, Pedro A. Barrio<sup>b</sup>, Burkhard Berger<sup>a</sup>, Martin Bodner<sup>a</sup>, Pablo Martin<sup>b</sup>, Walther Parson<sup>a,c,\*</sup>, The DNASEQEX Consortium

<sup>a</sup> Institute of Legal Medicine, Medical University of Innsbruck, Innsbruck, Austria

<sup>b</sup> National Institute of Toxicology and Forensic Sciences, Madrid Department, Las Rozas de Madrid, Spain

<sup>c</sup> Forensic Science Program, The Pennsylvania State University, PA, USA

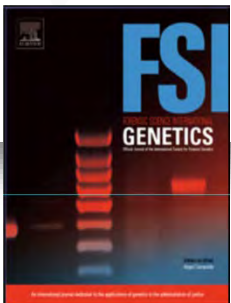

# ELECTROPHORESIS

Review

# Current state-of-art of STR sequencing in forensic genetics

Antonio Alonso , Pedro Alberto Barrio, Petra Müller, Steffi Köcher, Burkhard Berger, Pablo Martin, Martin Bodner, Sascha Willuweit, Walther Parson, Lutz Roewer, Bruce Budowle

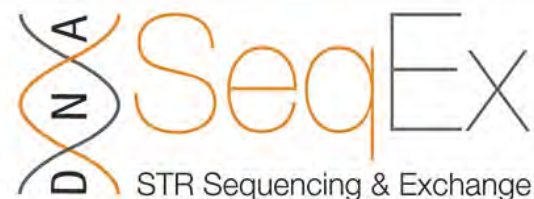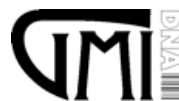



## (3) dna.bases

# MONOPOLY 2016 - STEFA - WP G7

Empowering forensic genetic DNA databases for the interpretation of next generation sequencing profiles (**dna.bases**)

STRidER & EmPOP

Jan 2018 - Dec 2019

Sequence alignments

Increase sample size

Increase markers/regions

Further develop QC tools

User-friendly access

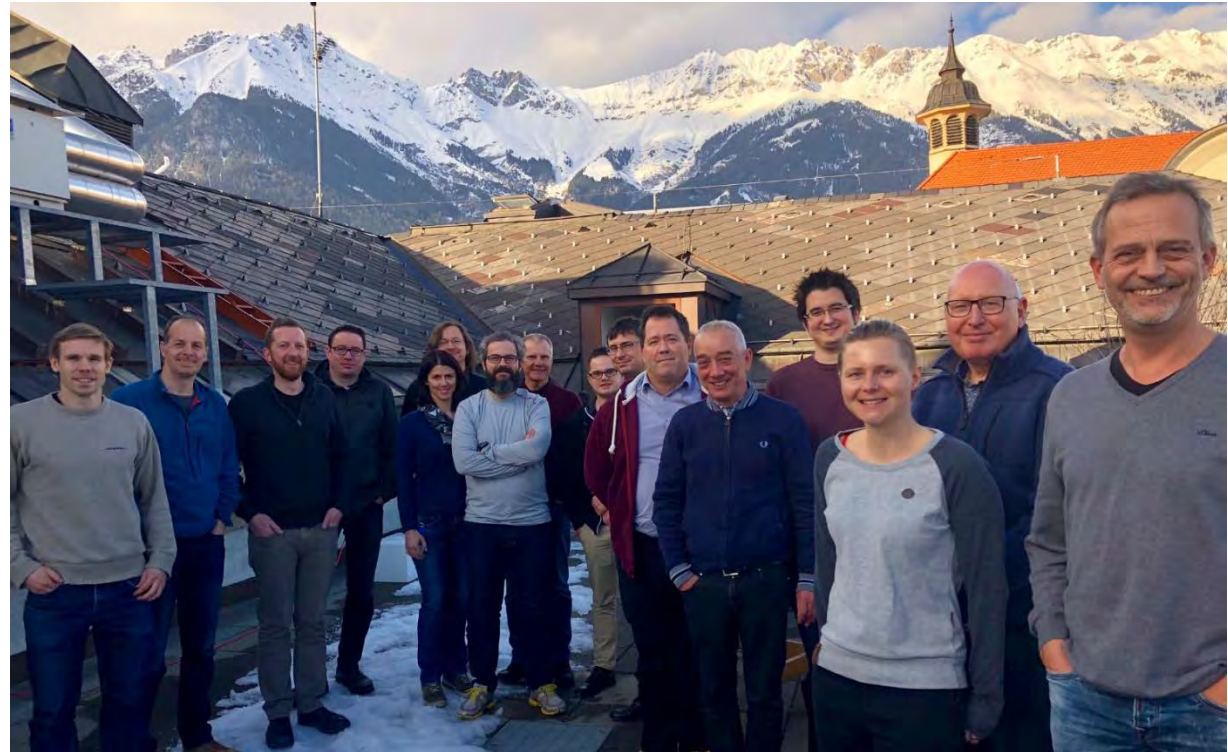

**STRidER**

**dna.bases**

**EMPOP**

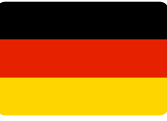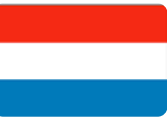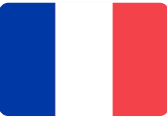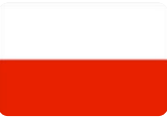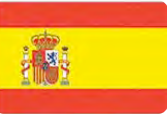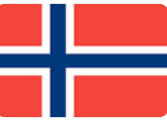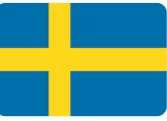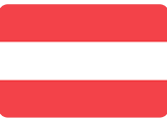

## Objectives of the work package

- 1) Develop a **new database engine concept** that enables event-based query of unaligned nucleotide sequence strings. This is relevant for the determination of DNA profiles with multiple sequence differences that are caused by single mutational events.

**Collaborate to use and further develop existing STR sequence alignment tools**

## Objectives of the work package

- 1) Develop a **new database engine concept** that enables event-based query of unaligned nucleotide sequence strings. This is relevant for the determination of DNA profiles with multiple sequence differences that are caused by single mutational events.
- 2) Extension of the number of **STR markers** and quality-controlled DNA profiles from global populations, including full mtGenome data and **STR sequences** generated by NGS.



## Objectives of the work package

- 1) Develop a **new database engine concept** that enables event-based query of unaligned nucleotide sequence strings. This is relevant for the determination of DNA profiles with multiple sequence differences that are caused by single mutational events.
- 2) Extension of the number of STR markers and quality-controlled DNA profiles from global populations, including full mtGenome data and STR sequences generated by NGS.
- 3) Update of existing and development of new tools for **quality control** of relevant genetic data. **Development and deployment of QC tools in database.**

## Objectives of the work package

- 1) Develop a **new database engine concept** that enables event-based query of unaligned nucleotide sequence strings. This is relevant for the determination of DNA profiles with multiple sequence differences that are caused by single mutational events.
- 2) Extension of the number of STR markers and quality-controlled DNA profiles from global populations, including full mtGenome data and STR sequences generated by NGS.
- 3) Update of existing and development of new tools for **quality control** of relevant genetic data.
- 4) Enable **user-friendly access** to the databases from diverse platforms including mobile devices and establish links to existing software for data interpretation of DNA evidence including Forensim and LRmix studio.

## (4) SeqForSTRs

# Sequencing of Forensic STRs

3 years (2017-2020)

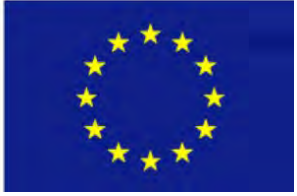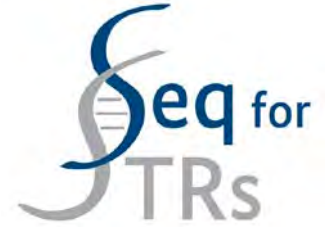

### Tasks

Population study STRs as data basis to evaluate MPS - STRidER

Concordance between CE and MPS

Validation Study

Cost - benefit study

Feedback to European Laboratories (ENFSI)

### Consortium

Federal crime lab **Wiesbaden** (Consortial leader)

**State crime labs:** Berlin, Bavaria, Rheinland-Pfalz

**Legal Medicine labs:** Berlin, Cologne, Innsbruck, Ulm

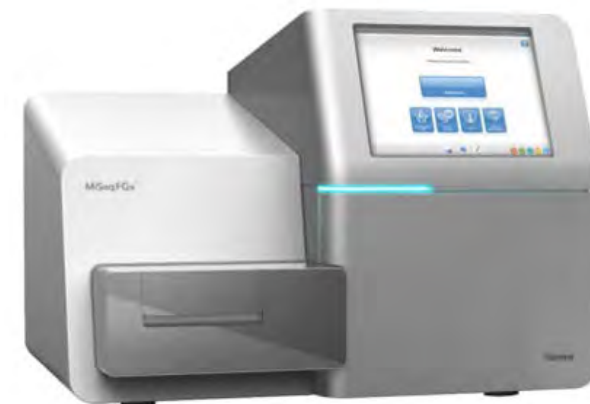

# Acknowledgements

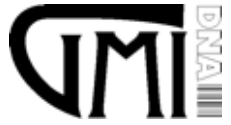

Richard Scheithauer, Daniela Niederwieser,  
Martin Pircher, Stefan Troger

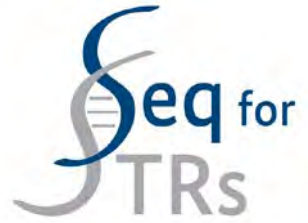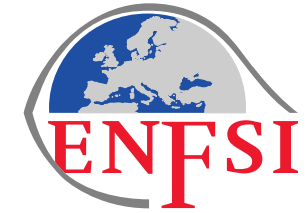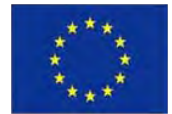

Monopoly 2010

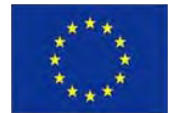

Monopoly 2014

vXWeb

ISFG Commission on MPS of STRs

ISFG Commission on STRidER

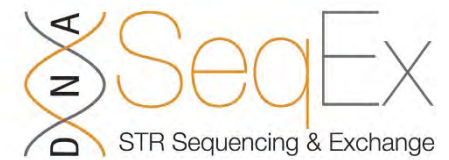

**dna.bases**

ENFSI laboratories

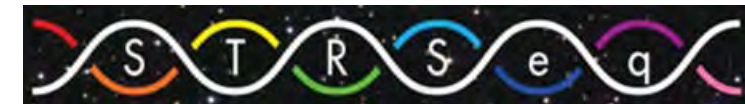

Peter Gill

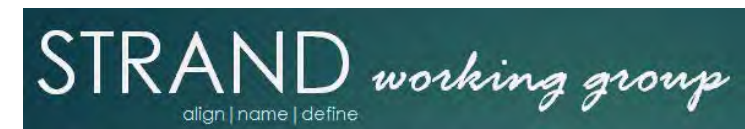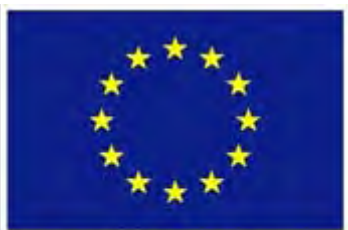

Co-funded by the Internal  
Security Fund of the  
European Union

*Thank you to all attendees!*

# STRAND *working group*

align | name | define

David Ballard  
Martin Bodner  
Lisa Borsuk  
Katherine Gettings  
Jonathan King  
Walther Parson  
Christopher Phillips

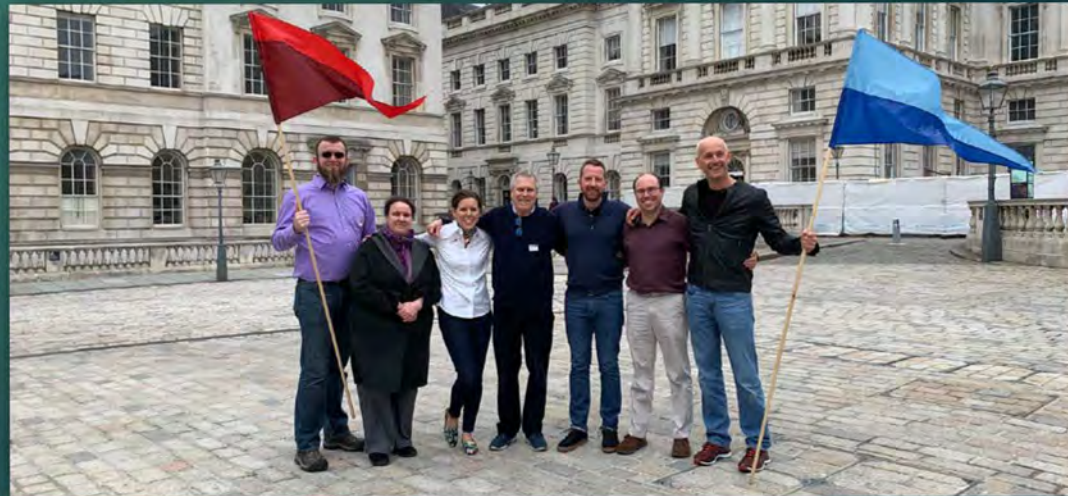

Supplement: NIHMS1588398-supplement-Supp1.pdf [file NIHMS1588398-supplement-Supp1.pdf]
